# Supplementary material
Source: MDPI journal article supplement (https://www.mdpi.com/2073-4395/11/12/2593)

**Figure S1.** Normal distribution of the observed data included in the meta-analysis after bootstrapping by SPSS Statistics 20 (IBM, USA). AV is ammonia volatilization ( $\text{kg N ha}^{-1}$ ), YSFP is yield scaled fertilizer productivity ( $\text{kg N Mg}^{-1}$  grains), NUE is nitrogen use efficiency (%), NAE is Nitrogen agronomic efficiency ( $\text{kg grains kg}^{-1}$  N) and PAN is productivity of applied nitrogen ( $\text{kg grains kg}^{-1}$  N).

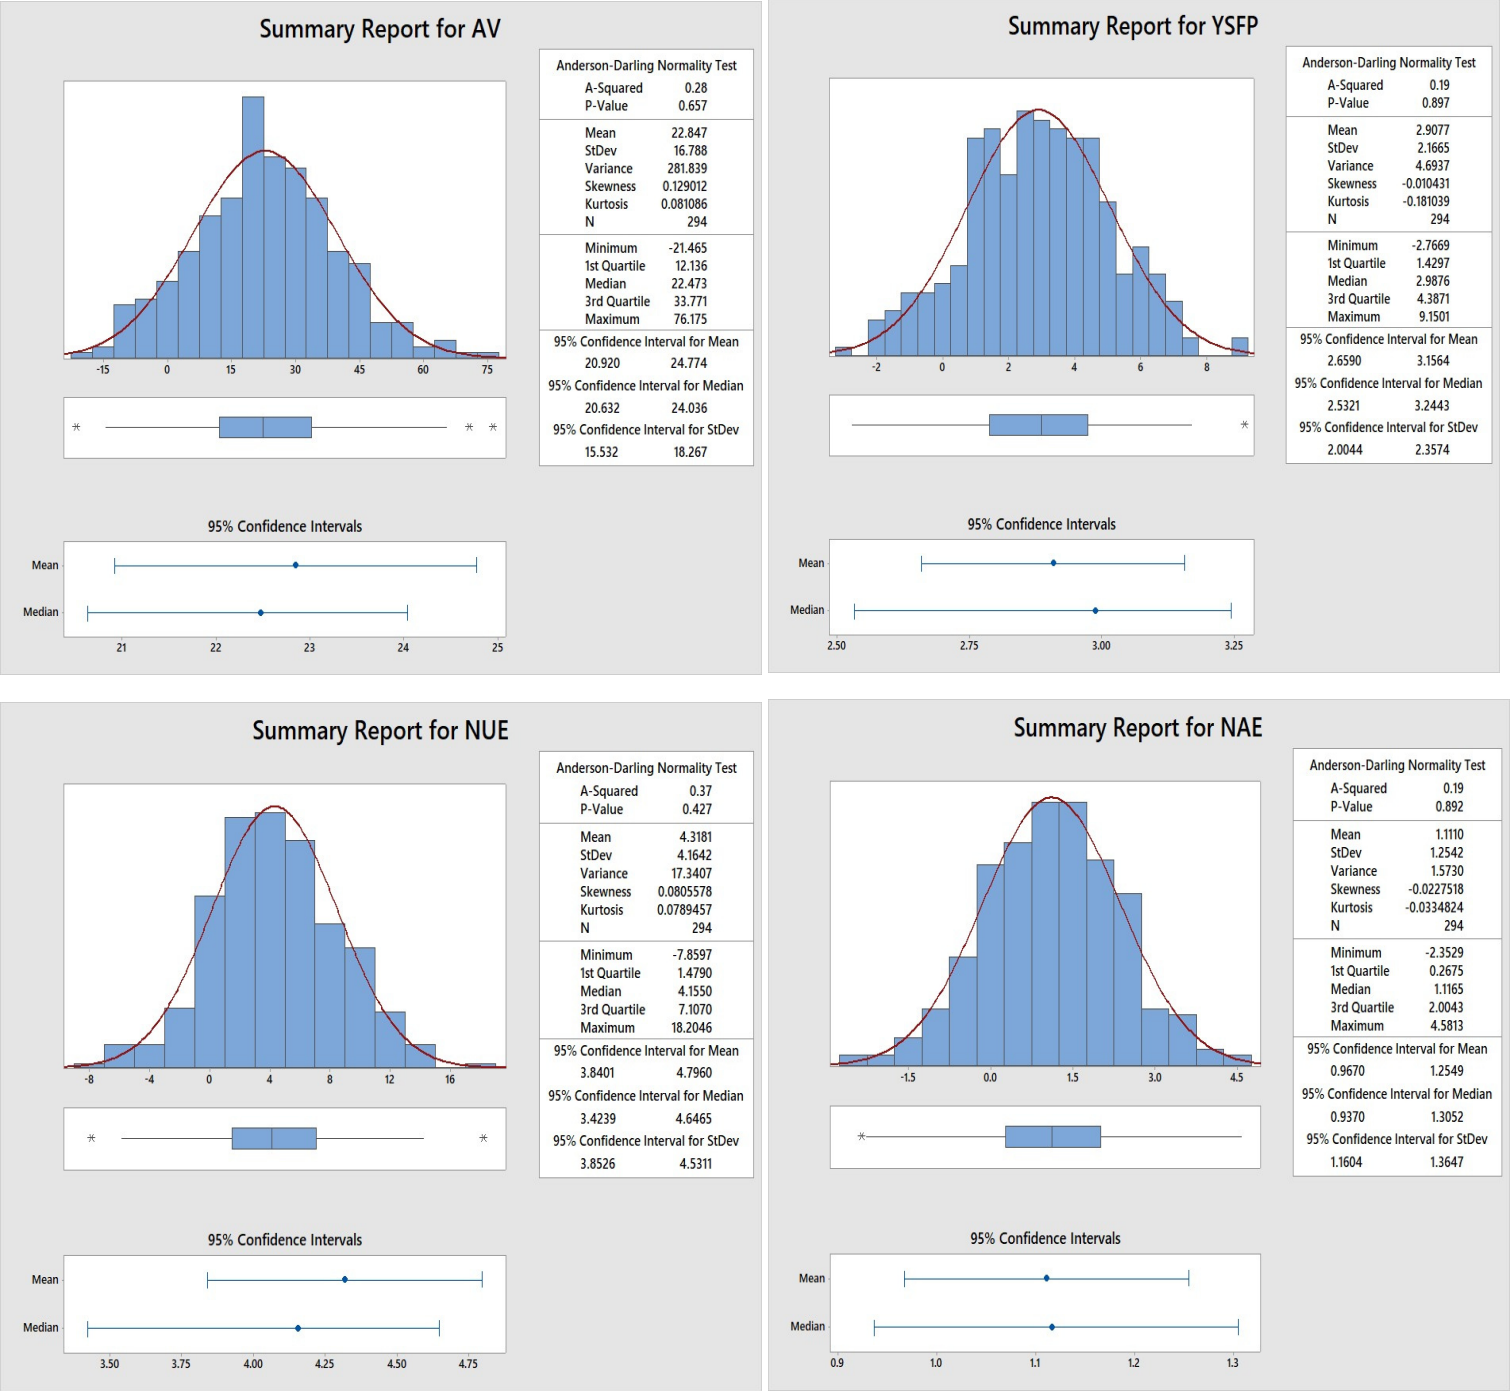

Summary Report for PAN

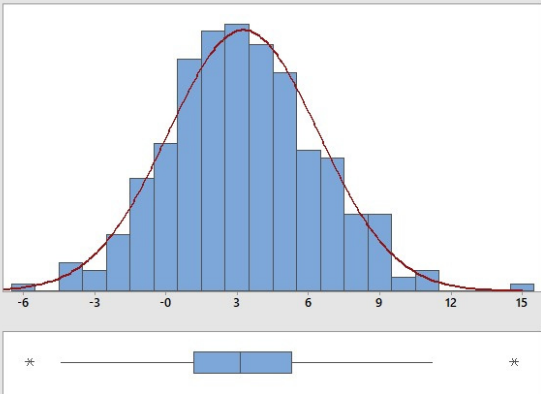

| Anderson-Darling Normality Test    |               |
|------------------------------------|---------------|
| A-Squared                          | 0.23          |
| P-Value                            | 0.805         |
| Mean                               | 3.2687        |
| StDev                              | 3.1642        |
| Variance                           | 10.0123       |
| Skewness                           | 0.167120      |
| Kurtosis                           | 0.207881      |
| N                                  | 294           |
| Minimum                            | -5.7237       |
| 1st Quartile                       | 1.1798        |
| Median                             | 3.1146        |
| 3rd Quartile                       | 5.3136        |
| Maximum                            | 14.6668       |
| 95% Confidence Interval for Mean   |               |
|                                    | 2.9055 3.6319 |
| 95% Confidence Interval for Median |               |
|                                    | 2.6932 3.5520 |
| 95% Confidence Interval for StDev  |               |
|                                    | 2.9275 3.4430 |

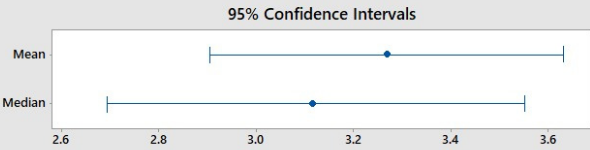

Supplement: s1 [file s1]
