# Supplementary material
Source: MDPI journal article supplement (https://www.mdpi.com/2073-4395/11/12/2593)
Supplement: s1 [file s1]

**Table S2.** List of abbreviations

| <b>Abbreviation</b>               | <b>Definition</b>                                                          |
|-----------------------------------|----------------------------------------------------------------------------|
| <b>AV</b>                         | Ammonia emission or volatilization                                         |
| <b>YSFP</b>                       | Yield scaled fertilizer productivity                                       |
| <b>NUE</b>                        | Nitrogen use efficiency                                                    |
| <b>NAE</b>                        | Nitrogen agronomic efficiency                                              |
| <b>PAN</b>                        | Productivity of applied nitrogen                                           |
| <b>SOM</b>                        | Soil organic matter content                                                |
| <b>STN</b>                        | Soil total N content                                                       |
| <b>CEC</b>                        | Cation exchange capacity                                                   |
| <b>N</b>                          | Nitrogen                                                                   |
| <b>NH<sub>4</sub><sup>+</sup></b> | Ammonium ions                                                              |
| <b>OH<sup>-</sup></b>             | Hydroxyl anion                                                             |
| <b>CMDC</b>                       | China Meteorological Data Service Center                                   |
| <b>ISI</b>                        | Web of Science                                                             |
| <b>CNKI</b>                       | China National Knowledge Infrastructure                                    |
| <b>SE</b>                         | Standard error                                                             |
| <b>STD</b>                        | Standard deviation                                                         |
| <b>CV</b>                         | Coefficient of variance                                                    |
| <b>CI</b>                         | Confidence interval                                                        |
| <b>GY</b>                         | Grain yield                                                                |
| <b>NU</b>                         | Nitrogen uptake                                                            |
| <b>OCF</b>                        | All mineral fertilizers except urea                                        |
| <b>IU</b>                         | Improved nitrogen fertilizers (The coated and slow released N fertilizers) |
| <b>OA</b>                         | Organic amendments                                                         |
| <b>CMA</b>                        | Comprehensive Meta-Analysis                                                |
| <b>ES</b>                         | Effect size                                                                |
| <b>SEM</b>                        | Structural equation model                                                  |
| <b>T</b>                          | Temperature                                                                |
| <b>P</b>                          | Precipitation                                                              |
| <b>C</b>                          | Clay                                                                       |
| <b>FT</b>                         | Fertilizer type                                                            |
| <b>FR</b>                         | Fertilizer rate                                                            |
| <b>AD</b>                         | Application depth                                                          |
| <b>A</b>                          | Amendments                                                                 |
