# Supplementary material
Source: MDPI journal article supplement (https://www.mdpi.com/2073-4395/11/12/2593)
Supplement: s1 [file s1]

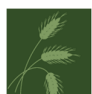

| Study name                             | Crop type | Fertilizer type | Fertilizer Rate (kg ha <sup>-1</sup> ) | Application depth | Amendments | T (°C) | P (mm) | Clay content (g kg <sup>-1</sup> ) | pH  | SOM (g kg <sup>-1</sup> ) | STN (g kg <sup>-1</sup> ) | Agronomic weights of ammonia volatilization |          |          |          |
|----------------------------------------|-----------|-----------------|----------------------------------------|-------------------|------------|--------|--------|------------------------------------|-----|---------------------------|---------------------------|---------------------------------------------|----------|----------|----------|
|                                        |           |                 |                                        |                   |            |        |        |                                    |     |                           |                           | Adj. YSFP                                   | Adj. NUE | Adj. NAE | Adj. PAN |
|                                        |           |                 |                                        |                   |            |        |        |                                    |     |                           |                           |                                             |          |          |          |
| Roelcke, <i>et al.</i> [1]             | W         | OCF             | 100                                    | SUR               | NA         | 65.4   | 211.1  | 230.0                              | 7.7 | 12.6                      | 0.8                       | 28.10                                       | 14.41    | 5.27     | 32.56    |
| Roelcke, Li, Tian, Gao and Richter [1] | W         | OCF             | 100                                    | SUB               | NA         | 65.4   | 211.1  | 230.0                              | 7.7 | 12.6                      | 0.8                       | 25.68                                       | 31.14    | 10.39    | 38.88    |
| Roelcke, Li, Tian, Gao and Richter [1] | W         | OCF             | 200                                    | SUR               | NA         | 65.4   | 211.1  | 230.0                              | 7.7 | 12.6                      | 0.8                       | 39.03                                       | 25.91    | 9.55     | 23.16    |
| Roelcke, Li, Tian, Gao and Richter [1] | W         | OCF             | 200                                    | SUB               | NA         | 65.4   | 211.1  | 230.0                              | 7.7 | 12.6                      | 0.8                       | 35.54                                       | 46.07    | 13.85    | 28.10    |
| Roelcke, Li, Tian, Gao and Richter [1] | W         | U               | 100                                    | SUR               | NA         | 62.6   | 258.9  | 230.0                              | 7.7 | 12.6                      | 0.8                       | 25.76                                       | 29.97    | 9.82     | 38.09    |
| Roelcke, Li, Tian, Gao and Richter [1] | W         | U               | 100                                    | SUB               | NA         | 62.6   | 258.9  | 230.0                              | 7.7 | 12.6                      | 0.8                       | 23.57                                       | 54.54    | 13.80    | 42.30    |
| Roelcke, Li, Tian, Gao and Richter [1] | W         | U               | 200                                    | SUR               | NA         | 62.6   | 258.9  | 230.0                              | 7.7 | 12.6                      | 0.8                       | 36.20                                       | 37.94    | 12.77    | 26.83    |
| Roelcke, Li, Tian, Gao and Richter [1] | W         | U               | 200                                    | SUB               | NA         | 62.6   | 258.9  | 230.0                              | 7.7 | 12.6                      | 0.8                       | 33.17                                       | 56.89    | 15.85    | 30.10    |
| Li, <i>et al.</i> [2]                  | W         | U               | 240                                    | SUB               | NA         | 66.2   | 220.3  | 60.0                               | 7.7 | 18.2                      | 1.2                       | 39.82                                       | 42.92    | 9.73     | 21.79    |
| Li et al. (2015b)                      | W         | U               | 150                                    | SUB               | NA         | 66.2   | 220.3  | 60.0                               | 7.7 | 18.2                      | 1.2                       | 26.56                                       | 46.58    | 12.32    | 31.23    |
| Li et al. (2015b)                      | W         | U               | 150                                    | SUR               | IA         | 66.2   | 220.3  | 60.0                               | 7.7 | 18.2                      | 1.2                       | 24.40                                       | 66.37    | 17.22    | 36.85    |
| Li et al. (2015b)                      | W         | U               | 150                                    | SUR               | NA         | 66.2   | 220.3  | 60.0                               | 7.7 | 18.2                      | 1.2                       | 22.90                                       | 35.10    | 9.52     | 26.02    |
| Li et al. (2015b)                      | W         | U               | 150                                    | SUB               | IA         | 66.2   | 220.3  | 60.0                               | 7.7 | 18.2                      | 1.2                       | 25.07                                       | 65.58    | 16.83    | 36.67    |
| Li et al. (2015b)                      | W         | U               | 120                                    | SUB               | NA         | 66.2   | 220.3  | 60.0                               | 7.7 | 18.2                      | 1.2                       | 20.55                                       | 71.69    | 18.91    | 43.33    |
| Jing, <i>et al.</i> [3]                | W         | U               | 90                                     | SUR               | NA         | 67.9   | 187.1  | 165.0                              | 8.5 | 13.0                      | 0.9                       | 22.60                                       | 32.99    | 9.52     | 39.35    |
| Jing et al. (2017)                     | W         | U               | 180                                    | SUR               | NA         | 67.9   | 187.1  | 165.0                              | 8.5 | 13.0                      | 0.9                       | 29.39                                       | 58.24    | 16.64    | 31.76    |

|                                 |   |    |       |     |    |      |       |       |     |      |     |       |       |       |       |
|---------------------------------|---|----|-------|-----|----|------|-------|-------|-----|------|-----|-------|-------|-------|-------|
| <b>Wu, <i>et al.</i> [4]</b>    | W | U  | 90    | SUR | NA | 69.0 | 190.8 | 165.0 | 8.3 | 17.8 | 1.3 | 18.68 | 40.39 | 13.96 | 48.61 |
| Wu et al. (2019)                | W | U  | 90    | SUR | BA | 69.0 | 190.8 | 165.0 | 8.3 | 17.8 | 1.3 | 17.62 | 50.76 | 16.73 | 51.31 |
| Wu et al. (2019)                | W | U  | 90    | SUR | BA | 69.0 | 190.8 | 165.0 | 8.3 | 17.8 | 1.3 | 17.61 | 51.56 | 17.10 | 51.82 |
| <b>Yang, <i>et al.</i> [5]</b>  | W | U  | 180   | SUB | NA | 66.2 | 220.3 | 165.0 | 8.3 | 13.0 | 0.9 | 32.15 | 50.40 | 13.92 | 29.52 |
| Yang et al. (2015a)             | W | U  | 180   | SUB | NA | 74.8 | 264.9 | 165.0 | 8.3 | 13.0 | 0.9 | 30.27 | 52.14 | 15.86 | 31.50 |
| Yang et al. (2015a)             | W | U  | 180   | SUB | MA | 66.2 | 220.3 | 165.0 | 8.3 | 13.0 | 0.9 | 29.78 | 58.49 | 14.44 | 31.89 |
| Yang et al. (2015a)             | W | U  | 180   | SUB | MA | 74.8 | 264.9 | 165.0 | 8.3 | 13.0 | 0.9 | 29.28 | 53.12 | 13.79 | 32.43 |
| <b>ShangGuan, <i>et al.</i></b> |   |    |       |     |    |      |       |       |     |      |     |       |       |       |       |
| <b>[6]</b>                      | W | U  | 180   | SUR | NA | 63.7 | 218.2 | 165.0 | 8.0 | 14.6 | 1.2 | 31.21 | 46.63 | 14.66 | 30.80 |
| ShangGuan et al. (2011)         | W | U  | 180   | SUR | NA | 63.7 | 218.2 | 165.0 | 8.0 | 14.6 | 1.2 | 30.24 | 57.10 | 16.30 | 32.65 |
| ShangGuan et al. (2011)         | W | U  | 240   | SUR | NA | 63.7 | 218.2 | 165.0 | 8.0 | 14.6 | 1.2 | 34.94 | 55.02 | 15.98 | 28.23 |
| <b>ShangGuan, <i>et al.</i></b> |   |    |       |     |    |      |       |       |     |      |     |       |       |       |       |
| <b>[7]</b>                      | W | U  | 180   | SUR | NA | 65.9 | 180.7 | 165.0 | 8.0 | 14.6 | 1.2 | 31.20 | 51.26 | 13.74 | 30.65 |
| ShangGuan et al. (2012)         | W | U  | 120   | SUR | NA | 65.9 | 180.7 | 165.0 | 8.0 | 14.6 | 1.2 | 22.71 | 56.59 | 17.53 | 43.28 |
| ShangGuan et al. (2012)         | W | U  | 180   | SUR | NA | 65.9 | 180.7 | 165.0 | 8.0 | 14.6 | 1.2 | 32.81 | 46.21 | 12.83 | 29.97 |
| ShangGuan et al. (2012)         | W | U  | 240   | SUR | NA | 65.9 | 180.7 | 165.0 | 8.0 | 14.6 | 1.2 | 36.93 | 47.01 | 13.68 | 26.49 |
| <b>Fu, <i>et al.</i> [8]</b>    | W | U  | 104   | SUB | NA | 39.8 | 91.7  | 528.0 | 8.2 | 17.4 | 0.9 | 20.88 | 30.42 | 8.06  | 43.84 |
| Fu et al. (2018)                | W | U  | 173   | SUB | NA | 39.8 | 91.7  | 528.0 | 8.2 | 17.4 | 0.9 | 30.28 | 41.70 | 8.97  | 30.39 |
| Fu et al. (2018)                | W | U  | 242   | SUB | NA | 39.8 | 91.7  | 528.0 | 8.2 | 17.4 | 0.9 | 36.86 | 42.87 | 9.66  | 24.92 |
| <b>Xu, <i>et al.</i> [9]</b>    | W | U  | 241.5 | SUB | NA | 39.8 | 91.7  | 528.0 | 8.2 | 17.4 | 0.9 | 37.75 | 41.99 | 10.17 | 24.31 |
| Xu et al. (2009a)               | W | U  | 151.8 | SUB | NA | 39.8 | 91.7  | 528.0 | 8.2 | 17.4 | 0.9 | 27.26 | 41.59 | 10.38 | 32.52 |
| Xu et al. (2009a)               | W | U  | 84.9  | SUB | NA | 39.8 | 91.7  | 528.0 | 8.2 | 17.4 | 0.9 | 14.28 | 29.38 | 8.39  | 41.96 |
| Xu et al. (2009a)               | W | U  | 216.7 | SUB | NA | 39.8 | 91.7  | 528.0 | 8.2 | 17.4 | 0.9 | 33.15 | 41.97 | 9.81  | 24.78 |
| <b>Wang, <i>et al.</i> [10]</b> | W | U  | 150   | SUB | NA | 63.4 | 88.1  | 202.0 | 8.2 | 11.4 | 0.7 | 30.16 | 64.74 | 10.76 | 31.64 |
| Wang et al. (2017)              | W | OA | 420   | SUB | NA | 63.4 | 88.1  | 202.0 | 8.2 | 11.4 | 0.7 | 79.20 | 42.45 | 4.80  | 12.34 |
| Wang et al. (2017)              | W | OA | 560   | SUB | NA | 63.4 | 88.1  | 202.0 | 8.2 | 11.4 | 0.7 | 97.86 | 40.98 | 4.30  | 9.94  |
| Wang et al. (2017)              | W | U  | 150   | SUB | NA | 68.4 | 127.6 | 202.0 | 8.2 | 11.4 | 0.7 | 29.74 | 59.83 | 11.22 | 32.09 |
| Wang et al. (2017)              | W | OA | 420   | SUB | NA | 68.4 | 127.6 | 202.0 | 8.2 | 11.4 | 0.7 | 80.72 | 36.52 | 4.57  | 12.10 |

|                          |   |    |       |     |    |      |       |       |     |      |     |       |       |       |       |
|--------------------------|---|----|-------|-----|----|------|-------|-------|-----|------|-----|-------|-------|-------|-------|
| Wang et al. (2017)       | W | OA | 560   | SUB | NA | 68.4 | 127.6 | 202.0 | 8.2 | 11.4 | 0.7 | 95.15 | 42.58 | 4.60  | 10.25 |
| Wang, <i>et al.</i> [11] | W | U  | 247.6 | SUB | NA | 88.7 | 394.9 | 192.0 | 8.0 | 10.3 | 0.8 | 36.43 | 49.34 | 6.45  | 17.66 |
| Wang et al. (2004)       | W | U  | 203.4 | SUB | NA | 88.7 | 394.9 | 192.0 | 8.0 | 10.3 | 0.8 | 31.88 | 54.08 | 7.24  | 21.22 |
| Wang et al. (2004)       | W | U  | 185.1 | SUB | NA | 88.7 | 394.9 | 192.0 | 8.0 | 10.3 | 0.8 | 30.59 | 52.28 | 7.17  | 22.74 |
| Wang et al. (2004)       | W | U  | 171   | SUB | NA | 88.7 | 394.9 | 192.0 | 8.0 | 10.3 | 0.8 | 29.99 | 50.85 | 6.73  | 23.79 |
| Wang et al. (2004)       | W | U  | 159.2 | SUB | NA | 88.7 | 394.9 | 192.0 | 8.0 | 10.3 | 0.8 | 29.02 | 50.43 | 6.65  | 25.20 |
| Wang et al. (2004)       | W | U  | 148.8 | SUB | NA | 88.7 | 394.9 | 192.0 | 8.0 | 10.3 | 0.8 | 30.97 | 41.72 | 4.12  | 24.21 |
| Wang et al. (2004)       | W | U  | 139.4 | SUB | NA | 88.7 | 394.9 | 192.0 | 8.0 | 10.3 | 0.8 | 29.39 | 42.51 | 4.45  | 26.19 |
| Liu, <i>et al.</i> [12]  | W | U  | 60    | SUB | NA | 74.2 | 229.8 | 170.0 | 7.8 | 26.7 | 1.4 | 15.28 | 43.02 | 10.20 | 59.10 |
| Liu et al. (2003)        | W | U  | 120   | SUB | NA | 74.2 | 229.8 | 170.0 | 7.8 | 26.7 | 1.4 | 25.90 | 48.35 | 9.65  | 33.35 |
| Liu et al. (2003)        | W | U  | 180   | SUB | NA | 74.2 | 229.8 | 170.0 | 7.8 | 26.7 | 1.4 | 31.29 | 54.11 | 8.77  | 23.40 |
| Yang, <i>et al.</i> [13] | W | U  | 120   | SUB | NA | 58.2 | 145.0 | 170.0 | 7.9 | 26.7 | 1.4 | 26.41 | 54.85 | 10.98 | 36.56 |
| Yang et al. (2019)       | W | U  | 240   | SUB | NA | 58.2 | 145.0 | 170.0 | 7.9 | 26.7 | 1.4 | 41.69 | 62.34 | 9.88  | 22.42 |
| Yang et al. (2019)       | W | U  | 360   | SUB | NA | 58.2 | 145.0 | 170.0 | 7.9 | 26.7 | 1.4 | 54.79 | 46.39 | 7.27  | 15.17 |
| Shan, <i>et al.</i> [14] | W | U  | 50    | SUB | NA | 44.9 | 85.8  | 355.0 | 8.3 | 12.1 | 0.9 | 9.73  | 93.30 | 35.17 | 88.28 |
| Shan et al. (2014)       | W | U  | 100   | SUB | NA | 44.9 | 85.8  | 355.0 | 8.3 | 12.1 | 0.9 | 19.32 | 74.72 | 19.67 | 46.68 |
| Shan et al. (2014)       | W | U  | 150   | SUB | NA | 44.9 | 85.8  | 355.0 | 8.3 | 12.1 | 0.9 | 25.39 | 81.67 | 17.17 | 35.03 |
| Shan et al. (2014)       | W | U  | 200   | SUB | NA | 44.9 | 85.8  | 355.0 | 8.3 | 12.1 | 0.9 | 36.34 | 66.28 | 11.36 | 24.83 |
| Shan et al. (2014)       | W | U  | 250   | SUB | NA | 44.9 | 85.8  | 355.0 | 8.3 | 12.1 | 0.9 | 48.28 | 54.80 | 8.02  | 18.84 |
| Shan et al. (2014)       | W | U  | 300   | SUB | NA | 44.9 | 85.8  | 355.0 | 8.3 | 12.1 | 0.9 | 64.87 | 46.04 | 5.02  | 14.03 |
| Shan et al. (2014)       | W | U  | 400   | SUB | NA | 44.9 | 85.8  | 355.0 | 8.3 | 12.1 | 0.9 | 89.87 | 35.53 | 3.68  | 10.57 |
| Shan et al. (2013)       | W | U  | 50    | SUR | NA | 50.3 | 79.4  | 355.0 | 8.3 | 12.1 | 0.9 | 12.50 | 57.95 | 17.65 | 75.51 |
| Shan, <i>et al.</i> [15] | W | U  | 75    | SUR | NA | 50.3 | 79.4  | 355.0 | 8.3 | 12.1 | 0.9 | 17.26 | 54.54 | 16.31 | 54.80 |
| Shan et al. (2013)       | W | U  | 100   | SUR | NA | 50.3 | 79.4  | 355.0 | 8.3 | 12.1 | 0.9 | 20.54 | 65.39 | 16.79 | 45.43 |
| Shan et al. (2013)       | W | U  | 125   | SUR | NA | 50.3 | 79.4  | 355.0 | 8.3 | 12.1 | 0.9 | 24.50 | 67.82 | 15.00 | 37.81 |
| Shan et al. (2013)       | W | U  | 150   | SUR | NA | 50.3 | 79.4  | 355.0 | 8.3 | 12.1 | 0.9 | 27.66 | 69.15 | 13.60 | 32.26 |
| Shan et al. (2013)       | W | U  | 175   | SUR | NA | 50.3 | 79.4  | 355.0 | 8.3 | 12.1 | 0.9 | 30.57 | 71.26 | 13.47 | 29.55 |
| Shan et al. (2013)       | W | U  | 200   | SUR | NA | 50.3 | 79.4  | 355.0 | 8.3 | 12.1 | 0.9 | 31.88 | 73.20 | 13.44 | 27.25 |

|                                  |   |     |     |     |    |      |       |       |     |      |     |       |       |       |       |
|----------------------------------|---|-----|-----|-----|----|------|-------|-------|-----|------|-----|-------|-------|-------|-------|
| <b>Wang, <i>et al.</i> [16]</b>  | W | U   | 180 | SUR | NA | 71.9 | 194.4 | 119.0 | 7.6 | 20.2 | 1.5 | 24.08 | 47.12 | 11.66 | 26.59 |
| <b>Wang et al. (2018b)</b>       | W | OA  | 90  | SUB | NA | 71.9 | 194.4 | 119.0 | 7.6 | 20.2 | 1.5 | 9.99  | 44.04 | 18.81 | 45.63 |
| <b>Wang et al. (2018b)</b>       | W | U   | 180 | SUR | NA | 76.2 | 169.8 | 119.0 | 7.6 | 20.2 | 1.5 | 27.05 | 60.24 | 14.69 | 31.57 |
| <b>Wang et al. (2018b)</b>       | W | OA  | 90  | SUB | NA | 76.2 | 169.8 | 119.0 | 7.6 | 20.2 | 1.5 | 14.48 | 53.52 | 20.72 | 53.39 |
| <b>Wang et al. (2018b)</b>       | W | U   | 180 | SUR | NA | 71.9 | 194.4 | 119.0 | 7.6 | 20.2 | 1.5 | 26.49 | 38.84 | 8.19  | 22.80 |
| <b>Wang et al. (2018b)</b>       | W | OA  | 90  | SUB | NA | 71.9 | 194.4 | 119.0 | 7.6 | 20.2 | 1.5 | 11.63 | 30.12 | 10.73 | 37.12 |
| <b>Wang et al. (2018b)</b>       | W | U   | 180 | SUR | NA | 76.2 | 169.8 | 119.0 | 7.6 | 20.2 | 1.5 | 30.78 | 49.12 | 10.90 | 27.80 |
| <b>Wang et al. (2018b)</b>       | W | OA  | 90  | SUB | NA | 76.2 | 169.8 | 119.0 | 7.6 | 20.2 | 1.5 | 16.83 | 36.59 | 12.98 | 45.52 |
| <b>Wang et al. (2018b)</b>       | W | U   | 180 | SUR | NA | 71.9 | 194.4 | 119.0 | 7.6 | 20.2 | 1.5 | 21.36 | 55.09 | 13.72 | 28.33 |
| <b>Wang et al. (2018b)</b>       | W | OA  | 90  | SUB | NA | 71.9 | 194.4 | 119.0 | 7.6 | 20.2 | 1.5 | 9.32  | 44.01 | 17.16 | 42.96 |
| <b>Wang et al. (2018b)</b>       | W | U   | 180 | SUR | NA | 76.2 | 169.8 | 119.0 | 7.6 | 20.2 | 1.5 | 23.49 | 74.08 | 19.40 | 36.26 |
| <b>Wang et al. (2018b)</b>       | W | OA  | 90  | SUB | NA | 76.2 | 169.8 | 119.0 | 7.6 | 20.2 | 1.5 | 13.03 | 63.21 | 25.20 | 57.41 |
| <b>Wang et al. (2018b)</b>       | W | U   | 180 | SUR | NA | 71.9 | 194.4 | 119.0 | 7.6 | 20.2 | 1.5 | 28.77 | 29.41 | 5.14  | 19.30 |
| <b>Wang et al. (2018b)</b>       | W | OA  | 90  | SUB | NA | 71.9 | 194.4 | 119.0 | 7.6 | 20.2 | 1.5 | 12.45 | 18.19 | 5.37  | 30.88 |
| <b>Wang et al. (2018b)</b>       | W | U   | 180 | SUR | NA | 76.2 | 169.8 | 119.0 | 7.6 | 20.2 | 1.5 | 36.72 | 35.18 | 6.20  | 22.99 |
| <b>Wang et al. (2018b)</b>       | W | OA  | 90  | SUB | NA | 76.2 | 169.8 | 119.0 | 7.6 | 20.2 | 1.5 | 18.51 | 25.56 | 7.98  | 40.08 |
| <b>Zheng, <i>et al.</i> [17]</b> | W | U   | 180 | SUR | NA | 76.2 | 169.8 | 128.0 | 7.2 | 19.4 | 1.5 | 25.90 | 18.79 | 9.52  | 24.70 |
| <b>Zheng et al. (2017)</b>       | W | OA  | 180 | SUB | NA | 76.2 | 169.8 | 128.0 | 7.2 | 19.4 | 1.5 | 31.25 | 17.37 | 10.19 | 27.36 |
| <b>Zheng et al. (2017)</b>       | W | OA  | 180 | SUB | NA | 76.2 | 169.8 | 128.0 | 7.2 | 19.4 | 1.5 | 26.53 | 25.33 | 11.93 | 28.09 |
| <b>Shan, Zhao, Bi, An,</b>       |   |     |     |     |    |      |       |       |     |      |     |       |       |       |       |
| <b>Zhao and Du [14]</b>          | W | U   | 50  | SUB | NA | 76.2 | 169.8 | 128.0 | 7.2 | 19.4 | 1.5 | 9.73  | 87.99 | 35.17 | 88.28 |
| <b>Shan et al. (2014)</b>        | W | U   | 100 | SUB | NA | 76.2 | 169.8 | 128.0 | 7.2 | 19.4 | 1.5 | 19.32 | 72.02 | 19.67 | 46.68 |
| <b>Shan et al. (2014)</b>        | W | U   | 150 | SUB | NA | 76.2 | 169.8 | 128.0 | 7.2 | 19.4 | 1.5 | 25.39 | 79.89 | 17.17 | 35.03 |
| <b>Shan et al. (2014)</b>        | W | U   | 200 | SUB | NA | 76.2 | 169.8 | 128.0 | 7.2 | 19.4 | 1.5 | 36.34 | 64.93 | 11.36 | 24.83 |
| <b>Shan et al. (2014)</b>        | W | U   | 250 | SUB | NA | 76.2 | 169.8 | 128.0 | 7.2 | 19.4 | 1.5 | 48.28 | 53.72 | 8.02  | 18.84 |
| <b>Shan et al. (2014)</b>        | W | U   | 300 | SUB | NA | 76.2 | 169.8 | 128.0 | 7.2 | 19.4 | 1.5 | 64.87 | 45.13 | 5.02  | 14.03 |
| <b>Shan et al. (2014)</b>        | W | U   | 400 | SUB | NA | 76.2 | 169.8 | 128.0 | 7.2 | 19.4 | 1.5 | 89.87 | 34.84 | 3.68  | 10.57 |
| <b>Xiao, <i>et al.</i> [18]</b>  | W | OCF | 225 | SUB | NA | 51.9 | 88.5  | 442.0 | 8.0 | 13.4 | 1.2 | 43.43 | 61.39 | 9.79  | 22.52 |

|                                                        |   |     |     |     |    |      |       |       |      |      |     |       |       |       |       |
|--------------------------------------------------------|---|-----|-----|-----|----|------|-------|-------|------|------|-----|-------|-------|-------|-------|
| Xiao et al. (2016)                                     | W | OA  | 225 | SUB | NA | 51.9 | 88.5  | 442.0 | 8.0  | 13.4 | 1.2 | 38.61 | 79.38 | 12.54 | 25.25 |
| Xiao et al. (2016)                                     | W | OA  | 225 | SUB | NA | 51.9 | 88.5  | 442.0 | 8.0  | 13.4 | 1.2 | 40.51 | 71.21 | 11.16 | 23.81 |
| Zhou, <i>et al.</i> [19]                               | W | OCF | 180 | SUB | NA | 57.1 | 74.4  | 245.0 | 8.2  | 5.6  | 0.2 | 43.69 | 40.28 | 3.33  | 22.64 |
| Zhou et al. (2016)                                     | W | U   | 180 | SUB | NA | 57.1 | 74.4  | 245.0 | 8.2  | 5.6  | 0.2 | 45.20 | 36.93 | 1.95  | 20.77 |
| Zhou et al. (2016)                                     | W | IU  | 180 | SUB | NA | 55.9 | 147.4 | 245.0 | 8.2  | 5.6  | 0.2 | 40.11 | 49.48 | 4.79  | 23.75 |
| Zhou et al. (2016)                                     | W | IU  | 180 | SUB | NA | 55.9 | 147.4 | 245.0 | 8.2  | 5.6  | 0.2 | 40.10 | 49.47 | 4.79  | 23.74 |
| Zhou et al. (2016)                                     | W | IU  | 180 | SUB | NA | 57.1 | 74.4  | 245.0 | 8.2  | 5.6  | 0.2 | 39.28 | 52.14 | 5.48  | 24.55 |
| Zhou et al. (2016)                                     | W | IU  | 180 | SUB | NA | 55.9 | 147.4 | 245.0 | 8.2  | 5.6  | 0.2 | 38.92 | 54.17 | 5.97  | 25.19 |
| Ji, <i>et al.</i> [20]                                 | W | U   | 75  | SUB | NA | 61.0 | 96.5  | 421.0 | 8.6  | 10.2 | 1.0 | 16.42 | 38.89 | 11.72 | 55.42 |
| Ji et al. (2010)                                       | W | U   | 150 | SUB | NA | 61.0 | 96.5  | 421.0 | 8.6  | 10.2 | 1.0 | 29.39 | 63.81 | 10.10 | 31.86 |
| Ji et al. (2010)                                       | W | U   | 225 | SUB | NA | 61.0 | 96.5  | 421.0 | 8.6  | 10.2 | 1.0 | 39.77 | 62.40 | 9.20  | 23.65 |
| Ji et al. (2010)                                       | W | U   | 300 | SUB | NA | 61.0 | 96.5  | 421.0 | 8.6  | 10.2 | 1.0 | 48.44 | 56.45 | 8.47  | 19.22 |
| Xiao, Fan, Ye, Liu, Yan, Luo, Houlbrooke and Ding [18] |   |     |     |     |    |      |       |       |      |      |     |       |       |       |       |
| Ding [18]                                              | W | OCF | 225 | SUB | NA | 51.9 | 88.5  | 275.0 | 8.0  | 10.6 | 1.1 | 38.84 | 50.21 | 6.37  | 20.06 |
| Xiao et al. (2016)                                     | W | OA  | 225 | SUB | NA | 51.9 | 88.5  | 275.0 | 8.0  | 10.6 | 1.1 | 36.74 | 65.62 | 9.42  | 23.86 |
| Xiao et al. (2016)                                     | W | OA  | 225 | SUB | NA | 51.9 | 88.5  | 275.0 | 8.0  | 10.6 | 1.1 | 35.86 | 73.19 | 10.59 | 25.26 |
| Ma, <i>et al.</i> [21]                                 | W | U   | 135 | SUR | NA | 58.7 | 58.7  | 421.0 | 8.6  | 10.2 | 1.0 | 27.19 | 58.79 | 10.18 | 32.87 |
| Ma et al. (2012)                                       | W | U   | 270 | SUR | NA | 58.7 | 58.7  | 421.0 | 8.6  | 10.2 | 1.0 | 45.34 | 61.84 | 8.51  | 19.85 |
| Ma et al. (2012)                                       | W | U   | 405 | SUR | NA | 58.7 | 58.7  | 421.0 | 8.6  | 10.2 | 1.0 | 61.69 | 52.70 | 7.03  | 14.57 |
| Ma et al. (2012)                                       | W | U   | 540 | SUR | NA | 58.7 | 58.7  | 421.0 | 8.6  | 10.2 | 1.0 | 80.93 | 42.50 | 5.44  | 11.09 |
| Wang, <i>et al.</i> [22]                               | W | U   | 300 | SUR | NA | 60.9 | 229.7 | 315.0 | 8.6  | 8.9  | 0.8 | 43.21 | 35.82 | 9.61  | 20.09 |
| Wang et al. (2009c)                                    | W | U   | 210 | SUR | NA | 60.9 | 229.7 | 315.0 | 8.6  | 8.9  | 0.8 | 30.54 | 35.93 | 13.35 | 28.39 |
| Wang et al. (2009c)                                    | W | U   | 210 | SUR | NA | 60.9 | 229.7 | 315.0 | 8.6  | 8.9  | 0.8 | 30.26 | 40.11 | 14.30 | 29.57 |
| Li, <i>et al.</i> [23]                                 | W | U   | 315 | SUR | NA | 60.9 | 219.0 | 22.3  | 13.2 | 8.5  | 0.8 | 44.92 | 29.77 | 7.94  | 17.64 |
| Li et al. (2020a)                                      | W | U   | 270 | SUR | NA | 60.9 | 219.0 | 22.3  | 13.2 | 8.5  | 0.8 | 36.34 | 32.64 | 9.79  | 21.76 |
| Li et al. (2020a)                                      | W | U   | 270 | SUR | NA | 60.9 | 219.0 | 22.3  | 13.2 | 8.5  | 0.8 | 40.87 | 27.34 | 8.93  | 19.85 |

|                      |     |     |       |     |    |       |       |       |      |      |     |       |       |       |       |
|----------------------|-----|-----|-------|-----|----|-------|-------|-------|------|------|-----|-------|-------|-------|-------|
| Li et al. (2020a)    | W   | U   | 270   | SUR | NA | 60.9  | 219.0 | 22.3  | 13.2 | 8.5  | 0.8 | 37.66 | 30.94 | 9.52  | 21.15 |
| Li et al. (2020a)    | W   | U   | 270   | SUR | NA | 60.9  | 219.0 | 22.3  | 13.2 | 8.5  | 0.8 | 40.92 | 30.76 | 9.68  | 21.52 |
| Li et al. (2020a)    | W   | U   | 270   | SUB | NA | 60.9  | 219.0 | 22.3  | 13.2 | 8.5  | 0.8 | 45.47 | 25.43 | 8.52  | 18.93 |
| Li et al. (2020a)    | W   | U   | 270   | SUB | NA | 60.9  | 219.0 | 22.3  | 13.2 | 8.5  | 0.8 | 45.50 | 26.17 | 8.68  | 19.30 |
| Meng, et al. [24]    | W   | OA  | 183.7 | SUB | NA | 58.7  | 320.0 | 23.3  | 9.2  | 5.8  | 1.1 | 23.40 | 42.64 | 0.00  | 40.14 |
| Meng et al. (2021)   | W   | OA  | 183.7 | SUB | NA | 58.7  | 320.0 | 23.3  | 9.2  | 5.8  | 1.1 | 21.28 | 48.72 | 3.94  | 44.03 |
| Meng et al. (2021)   | W   | OA  | 183.7 | SUB | NA | 58.7  | 320.0 | 23.3  | 9.2  | 5.8  | 1.1 | 20.23 | 56.96 | 6.35  | 46.52 |
| Huang, et al. [25]   | W   | U   | 300   | SUB | NA | 87.7  | 195.9 | 595.0 | 7.6  | 13.6 | 1.1 | 48.41 | 60.40 | 8.12  | 17.99 |
| Huang et al. (2017a) | W   | U   | 300   | SUB | NA | 87.7  | 195.9 | 595.0 | 7.6  | 13.6 | 1.1 | 49.41 | 69.80 | 9.10  | 19.45 |
| Huang et al. (2017a) | W   | U   | 300   | SUB | NA | 87.7  | 195.9 | 595.0 | 7.6  | 13.6 | 1.1 | 49.81 | 65.31 | 8.60  | 18.83 |
| Huang et al. (2017a) | W   | OA  | 300   | SUB | NA | 87.7  | 195.9 | 595.0 | 7.6  | 13.6 | 1.1 | 48.49 | 66.06 | 8.48  | 18.49 |
| Li, et al. [26]      | W-R | OCF | 180   | SUB | NA | 104.5 | 373.6 | 223.0 | 7.0  | 13.3 | 1.9 | 15.30 | 47.22 | 8.59  | 36.34 |
| Li et al. (2015c)    | W-R | OA  | 135   | SUB | NA | 104.5 | 373.6 | 223.0 | 7.0  | 13.3 | 1.9 | 9.93  | 55.66 | 11.89 | 46.85 |
| Li et al. (2015c)    | W-R | OA  | 90    | SUB | NA | 104.5 | 373.6 | 223.0 | 7.0  | 13.3 | 1.9 | 5.08  | 59.24 | 21.05 | 69.81 |
| Li et al. (2015c)    | W-R | OA  | 180   | SUB | NA | 104.5 | 373.6 | 223.0 | 7.0  | 13.3 | 1.9 | 14.78 | 52.23 | 11.69 | 40.10 |
| Li et al. (2015c)    | W-R | OA  | 270   | SUB | NA | 104.5 | 373.6 | 223.0 | 7.0  | 13.3 | 1.9 | 22.79 | 50.18 | 7.50  | 26.53 |
| Li et al. (2015c)    | W-R | OA  | 360   | SUB | NA | 104.5 | 373.6 | 223.0 | 7.0  | 13.3 | 1.9 | 31.91 | 40.83 | 4.90  | 19.23 |
| Zhang, et al. [27]   | W   | OCF | 130   | SUB | NA | 105.7 | 339.3 | 284.0 | 7.8  | 11.2 | 0.7 | 24.80 | 52.99 | 7.24  | 35.11 |
| Zhang et al. (2015a) | W   | U   | 130   | SUB | NA | 101.5 | 198.2 | 284.0 | 7.8  | 11.2 | 0.7 | 23.63 | 59.21 | 8.37  | 35.90 |
| Sun, et al. [28]     | W   | U   | 250   | SUB | NA | 84.1  | 250.4 | 205.0 | 5.7  | 25.2 | 2.5 | 40.36 | 59.27 | 9.10  | 20.99 |
| Sun et al. (2018b)   | W   | OA  | 250   | SUB | MA | 84.1  | 250.4 | 205.0 | 5.7  | 25.2 | 2.5 | 39.98 | 57.04 | 8.21  | 19.73 |
| Sun et al. (2018b)   | W   | OA  | 250   | SUB | MA | 84.1  | 250.4 | 205.0 | 5.7  | 25.2 | 2.5 | 41.47 | 52.63 | 7.17  | 18.57 |
| Tian, et al. [29]    | W   | OA  | 100   | SUB | MA | 79.8  | 371.0 | 275.0 | 6.3  | 9.9  | 0.7 | 23.97 | 26.63 | 8.36  | 35.78 |
| Tian et al. (2001)   | W   | OA  | 200   | SUB | MA | 79.8  | 371.0 | 275.0 | 6.3  | 9.9  | 0.7 | 41.94 | 44.12 | 7.43  | 21.43 |
| Tian et al. (2001)   | W   | OA  | 300   | SUB | MA | 79.8  | 371.0 | 275.0 | 6.3  | 9.9  | 0.7 | 54.72 | 56.76 | 7.20  | 16.57 |
| Tian et al. (2001)   | W   | U   | 200   | SUB | NA | 79.8  | 371.0 | 275.0 | 6.3  | 9.9  | 0.7 | 36.04 | 48.46 | 10.30 | 24.08 |
| Tian et al. (2001)   | W   | OA  | 100   | SUB | MA | 89.7  | 473.3 | 275.0 | 6.3  | 9.9  | 0.7 | 24.23 | 30.47 | 9.75  | 39.80 |
| Tian et al. (2001)   | W   | OA  | 200   | SUB | MA | 89.7  | 473.3 | 275.0 | 6.3  | 9.9  | 0.7 | 37.62 | 55.89 | 10.58 | 25.56 |

|                                                                                          |   |    |     |     |    |      |       |       |     |      |     |       |       |       |       |
|------------------------------------------------------------------------------------------|---|----|-----|-----|----|------|-------|-------|-----|------|-----|-------|-------|-------|-------|
| Tian et al. (2001)                                                                       | W | OA | 300 | SUB | MA | 89.7 | 473.3 | 275.0 | 6.3 | 9.9  | 0.7 | 55.03 | 59.93 | 7.54  | 17.54 |
| Tian et al. (2001)                                                                       | W | U  | 200 | SUB | MA | 89.7 | 473.3 | 275.0 | 6.3 | 9.9  | 0.7 | 35.68 | 55.02 | 11.95 | 26.93 |
| He, <i>et al.</i> [30]                                                                   | W | U  | 150 | SUB | NA | 96.2 | 384.3 | 268.0 | 5.6 | 34.9 | 1.8 | 30.54 | 43.19 | 10.22 | 29.70 |
| He et al. (2018a)                                                                        | W | U  | 125 | SUB | NA | 96.2 | 384.3 | 268.0 | 5.6 | 34.9 | 1.8 | 27.76 | 33.74 | 9.20  | 32.55 |
| He et al. (2018a)                                                                        | W | U  | 125 | SUB | BA | 96.2 | 384.3 | 268.0 | 5.6 | 34.9 | 1.8 | 25.62 | 41.39 | 11.05 | 34.00 |
| He et al. (2018a)                                                                        | W | U  | 125 | SUB | BA | 96.2 | 384.3 | 268.0 | 5.6 | 34.9 | 1.8 | 25.33 | 39.76 | 10.50 | 33.03 |
| He et al. (2018a)                                                                        | W | U  | 125 | SUB | BA | 96.2 | 384.3 | 268.0 | 5.6 | 34.9 | 1.8 | 25.95 | 49.23 | 12.52 | 36.36 |
| He et al. (2018a)                                                                        | W | U  | 125 | SUB | BA | 96.2 | 384.3 | 268.0 | 5.6 | 34.9 | 1.8 | 26.31 | 49.32 | 11.30 | 34.81 |
| He et al. (2018a)                                                                        | W | U  | 125 | SUB | IA | 96.2 | 384.3 | 268.0 | 5.6 | 34.9 | 1.8 | 26.21 | 47.97 | 10.88 | 34.12 |
| Tian, <i>et al.</i> [31]                                                                 | W | U  | 40  | SUB | MA | 92.0 | 392.5 | 275.0 | 6.3 | 9.9  | 0.7 | 9.08  | 39.60 | 12.85 | 75.94 |
| Tian et al. (1998)                                                                       | W | U  | 80  | SUB | MA | 92.0 | 392.5 | 275.0 | 6.3 | 9.9  | 0.7 | 17.24 | 49.03 | 11.71 | 44.63 |
| Tian et al. (1998)                                                                       | W | U  | 120 | SUB | MA | 92.0 | 392.5 | 275.0 | 6.3 | 9.9  | 0.7 | 23.28 | 59.44 | 11.69 | 33.84 |
| Tian et al. (1998)                                                                       | W | U  | 80  | SUB | NA | 92.0 | 392.5 | 275.0 | 6.3 | 9.9  | 0.7 | 17.09 | 38.70 | 9.52  | 41.23 |
| Tian et al. (1998)                                                                       | W | U  | 40  | SUB | MA | 92.0 | 392.5 | 275.0 | 6.3 | 9.9  | 0.7 | 9.84  | 60.08 | 21.83 | 93.00 |
| Tian et al. (1998)                                                                       | W | U  | 80  | SUB | MA | 92.0 | 392.5 | 275.0 | 6.3 | 9.9  | 0.7 | 17.92 | 59.58 | 15.36 | 50.67 |
| Tian et al. (1998)                                                                       | W | U  | 120 | SUB | MA | 92.0 | 392.5 | 275.0 | 6.3 | 9.9  | 0.7 | 23.56 | 71.67 | 15.24 | 38.84 |
| Tian et al. (1998)                                                                       | W | U  | 80  | SUR | NA | 92.0 | 392.5 | 275.0 | 6.3 | 9.9  | 0.7 | 18.94 | 47.76 | 12.55 | 47.82 |
| Sun, <i>et al.</i> [32]                                                                  | W | U  | 150 | SUB | BA | 99.3 | 843.3 | 268.0 | 7.3 | 5.7  | 1.5 | 28.70 | 51.20 | 7.81  | 25.98 |
| Sun et al. (2019a)                                                                       | W | U  | 150 | SUB | BA | 99.3 | 843.3 | 268.0 | 7.3 | 5.7  | 1.5 | 29.30 | 47.54 | 7.44  | 25.69 |
| Sun et al. (2019a)                                                                       | W | U  | 150 | SUB | BA | 99.3 | 843.3 | 268.0 | 7.3 | 5.7  | 1.5 | 30.25 | 42.95 | 6.11  | 24.11 |
| Li, Yang, Wang,<br>Roelcke, Chen,<br>Zhang, Pasda,<br>Zerulla, Wissemeier<br>and Liu [2] | W | U  | 240 | SUB | NA | 84.6 | 331.7 | 100.0 | 5.8 | 21.4 | 1.2 | 41.12 | 50.23 | 7.30  | 18.18 |
| Li et al. (2015b)                                                                        | W | U  | 150 | SUB | NA | 84.6 | 331.7 | 100.0 | 5.8 | 21.4 | 1.2 | 30.08 | 51.39 | 7.42  | 24.86 |
| Li et al. (2015b)                                                                        | W | U  | 150 | SUB | IA | 84.6 | 331.7 | 100.0 | 5.8 | 21.4 | 1.2 | 29.50 | 68.96 | 11.12 | 29.90 |
| Li et al. (2015b)                                                                        | W | U  | 150 | SUB | NA | 84.6 | 331.7 | 100.0 | 5.8 | 21.4 | 1.2 | 28.07 | 55.40 | 8.69  | 25.93 |

|                               |   |     |     |     |    |       |       |       |      |      |     |       |       |       |       |
|-------------------------------|---|-----|-----|-----|----|-------|-------|-------|------|------|-----|-------|-------|-------|-------|
| Li et al. (2015b)             | W | U   | 150 | SUB | IA | 84.6  | 331.7 | 100.0 | 5.8  | 21.4 | 1.2 | 31.18 | 68.81 | 10.81 | 30.17 |
| Li et al. (2015b)             | W | U   | 120 | SUB | IA | 84.6  | 331.7 | 100.0 | 5.8  | 21.4 | 1.2 | 24.85 | 88.10 | 14.02 | 38.42 |
| Pacholski, <i>et al.</i> [33] | W | U   | 120 | SUR | NA | 82.8  | 68.1  | 104.0 | 8.6  | 9.3  | 0.6 | 25.04 | 49.76 | 9.85  | 34.49 |
| Pacholski et al. (2006)       | W | U   | 120 | SUB | NA | 82.8  | 68.1  | 104.0 | 8.6  | 9.3  | 0.6 | 24.77 | 59.61 | 11.80 | 37.19 |
| Pacholski et al. (2006)       | W | U   | 100 | SUR | NA | 82.8  | 68.1  | 104.0 | 8.6  | 9.3  | 0.6 | 22.25 | 43.42 | 8.76  | 38.26 |
| Pacholski et al. (2006)       | W | U   | 100 | SUB | NA | 82.8  | 68.1  | 104.0 | 8.6  | 9.3  | 0.6 | 22.90 | 51.47 | 9.94  | 40.74 |
| Huang, <i>et al.</i> [34]     | W | U   | 150 | SUR | NA | 83.3  | 147.7 | 137.0 | 8.3  | 10.2 | 0.6 | 28.74 | 34.92 | 9.45  | 28.28 |
| Huang et al. (2015)           | W | U   | 150 | SUR | NA | 83.3  | 147.7 | 137.0 | 8.3  | 10.2 | 0.6 | 28.50 | 36.05 | 8.88  | 27.38 |
| Huang et al. (2015)           | W | U   | 150 | SUR | NA | 83.3  | 147.7 | 137.0 | 8.3  | 10.2 | 0.6 | 29.03 | 40.32 | 10.31 | 29.63 |
| Huang et al. (2015)           | W | U   | 190 | SUR | NA | 83.3  | 147.7 | 137.0 | 8.3  | 10.2 | 0.6 | 31.93 | 35.41 | 7.47  | 21.21 |
| Huang et al. (2015)           | W | U   | 190 | SUR | NA | 83.3  | 147.7 | 137.0 | 8.3  | 10.2 | 0.6 | 35.22 | 39.03 | 8.32  | 23.21 |
| Huang et al. (2015)           | W | U   | 190 | SUR | NA | 83.3  | 147.7 | 137.0 | 8.3  | 10.2 | 0.6 | 35.21 | 36.06 | 8.12  | 22.92 |
| Huang et al. (2015)           | W | U   | 190 | SUR | NA | 83.3  | 147.7 | 137.0 | 8.3  | 10.2 | 0.6 | 35.60 | 39.42 | 9.15  | 24.48 |
| Huang et al. (2015)           | W | U   | 230 | SUR | NA | 83.3  | 147.7 | 137.0 | 8.3  | 10.2 | 0.6 | 37.76 | 45.53 | 9.25  | 21.50 |
| Huang et al. (2015)           | W | U   | 230 | SUR | NA | 83.3  | 147.7 | 137.0 | 8.3  | 10.2 | 0.6 | 36.76 | 44.20 | 8.40  | 20.17 |
| Huang et al. (2015)           | W | U   | 230 | SUR | NA | 83.3  | 147.7 | 137.0 | 8.3  | 10.2 | 0.6 | 41.26 | 42.45 | 8.75  | 21.52 |
| Huang et al. (2015)           | W | U   | 270 | SUR | NA | 83.3  | 147.7 | 137.0 | 8.3  | 10.2 | 0.6 | 37.56 | 41.98 | 6.85  | 16.09 |
| Huang et al. (2015)           | W | U   | 270 | SUR | NA | 83.3  | 147.7 | 137.0 | 8.3  | 10.2 | 0.6 | 42.81 | 51.43 | 8.79  | 19.30 |
| Huang et al. (2015)           | W | U   | 270 | SUR | NA | 83.3  | 147.7 | 137.0 | 8.3  | 10.2 | 0.6 | 42.99 | 53.06 | 8.70  | 19.22 |
| Jiang, <i>et al.</i> [35]     | W | OCF | 200 | SUR | NA | 88.7  | 512.2 | 280.0 | 6.1  | 31.7 | 2.1 | 18.79 | 69.16 | 12.41 | 37.88 |
| Jiang et al. (2018)           | W | OCF | 200 | SUR | NA | 88.7  | 512.2 | 280.0 | 6.1  | 31.7 | 2.1 | 18.92 | 70.60 | 12.82 | 38.56 |
| Jiang et al. (2018)           | W | IU  | 200 | SUB | NA | 88.7  | 512.2 | 280.0 | 6.1  | 31.7 | 2.1 | 19.81 | 80.81 | 13.86 | 40.76 |
| Jiang et al. (2018)           | W | IU  | 200 | SUB | NA | 88.7  | 512.2 | 280.0 | 6.1  | 31.7 | 2.1 | 19.26 | 81.56 | 14.31 | 40.92 |
| Jiang et al. (2018)           | W | IU  | 200 | SUB | NA | 88.7  | 512.2 | 280.0 | 6.1  | 31.7 | 2.1 | 20.20 | 78.82 | 13.12 | 40.04 |
| Jiang et al. (2018)           | W | OA  | 200 | SUB | NA | 88.7  | 512.2 | 280.0 | 6.1  | 31.7 | 2.1 | 20.13 | 70.04 | 11.35 | 37.45 |
| Zhao, <i>et al.</i> [36]      | W | U   | 100 | SUR | NA | 119.5 | 623.0 | 266.0 | 27.8 | 6.1  | 1.8 | 25.49 | 52.27 | 10.34 | 38.72 |
| Zhao et al. (2009b)           | W | U   | 250 | SUR | NA | 119.5 | 623.0 | 266.0 | 27.8 | 6.1  | 1.8 | 51.58 | 48.50 | 7.82  | 19.18 |



**Roelcke, Li, Tian,**

|                                  |   |     |     |     |    |       |       |       |     |      |     |       |       |       |       |
|----------------------------------|---|-----|-----|-----|----|-------|-------|-------|-----|------|-----|-------|-------|-------|-------|
| <b>Gao and Richter [1]</b>       | M | OCF | 100 | SUR | NA | 94.3  | 431.9 | 230.0 | 7.7 | 12.6 | 0.8 | 15.36 | 28.51 | 18.36 | 59.91 |
| <b>Roelcke et al. (2002)</b>     | M | OCF | 100 | SUB | NA | 94.3  | 431.9 | 230.0 | 7.7 | 12.6 | 0.8 | 13.93 | 53.31 | 23.41 | 64.49 |
| <b>Roelcke et al. (2002)</b>     | M | OCF | 200 | SUR | NA | 94.3  | 431.9 | 230.0 | 7.7 | 12.6 | 0.8 | 27.11 | 32.14 | 13.18 | 33.79 |
| <b>Roelcke et al. (2002)</b>     | M | OCF | 200 | SUB | NA | 94.3  | 431.9 | 230.0 | 7.7 | 12.6 | 0.8 | 24.03 | 48.75 | 16.89 | 37.28 |
| <b>Roelcke et al. (2002)</b>     | M | U   | 100 | SUR | NA | 96.7  | 311.9 | 230.0 | 7.7 | 12.6 | 0.8 | 19.74 | 25.14 | 6.37  | 48.52 |
| <b>Roelcke et al. (2002)</b>     | M | U   | 100 | SUB | NA | 96.7  | 311.9 | 230.0 | 7.7 | 12.6 | 0.8 | 17.99 | 48.42 | 11.67 | 54.18 |
| <b>Roelcke et al. (2002)</b>     | M | U   | 200 | SUR | NA | 96.7  | 311.9 | 230.0 | 7.7 | 12.6 | 0.8 | 26.14 | 42.91 | 15.37 | 36.35 |
| <b>Roelcke et al. (2002)</b>     | M | U   | 200 | SUB | NA | 96.7  | 311.9 | 230.0 | 7.7 | 12.6 | 0.8 | 23.72 | 65.06 | 19.01 | 39.96 |
| <b>Han, <i>et al.</i> [37]</b>   | M | U   | 59  | SUB | NA | 92.3  | 331.0 | 230.0 | 7.9 | 12.2 | 1.2 | 11.94 | 32.40 | 7.78  | 84.66 |
| <b>Han et al. (2014)</b>         | M | U   | 59  | SUR | NA | 94.0  | 353.9 | 230.0 | 7.9 | 12.2 | 1.2 | 11.08 | 47.29 | 7.99  | 80.20 |
| <b>Han et al. (2014)</b>         | M | U   | 200 | SUB | NA | 92.3  | 331.0 | 230.0 | 7.9 | 12.2 | 1.2 | 26.05 | 53.24 | 15.09 | 36.05 |
| <b>Han et al. (2014)</b>         | M | U   | 200 | SUR | NA | 94.0  | 353.9 | 230.0 | 7.9 | 12.2 | 1.2 | 21.56 | 55.50 | 14.33 | 32.77 |
| <b>Han et al. (2014)</b>         | M | U   | 200 | SUR | BA | 92.3  | 331.0 | 230.0 | 7.9 | 12.2 | 1.2 | 24.88 | 70.64 | 16.42 | 37.24 |
| <b>Han et al. (2014)</b>         | M | U   | 341 | SUB | NA | 94.0  | 353.9 | 230.0 | 7.9 | 12.2 | 1.2 | 39.73 | 43.04 | 11.31 | 23.47 |
| <b>Han et al. (2014)</b>         | M | U   | 341 | SUR | NA | 92.3  | 331.0 | 230.0 | 7.9 | 12.2 | 1.2 | 36.14 | 45.05 | 11.55 | 23.10 |
| <b>Han et al. (2014)</b>         | M | U   | 400 | SUR | BA | 94.0  | 353.9 | 230.0 | 7.9 | 12.2 | 1.2 | 44.40 | 43.19 | 10.65 | 21.00 |
| <b>Zhang, <i>et al.</i> [38]</b> | M | U   | 220 | SUB | NA | 67.9  | 187.1 | 301.0 | 8.0 | 10.5 | 0.3 | 27.54 | 18.00 | 5.58  | 19.77 |
| <b>Zhang et al. (2018)</b>       | M | U   | 220 | SUB | IA | 67.9  | 187.1 | 301.0 | 8.0 | 10.5 | 0.3 | 27.55 | 49.15 | 15.11 | 32.53 |
| <b>Zhang et al. (2018)</b>       | M | U   | 220 | SUR | IA | 67.9  | 187.1 | 301.0 | 8.0 | 10.5 | 0.3 | 28.26 | 48.79 | 13.59 | 30.77 |
| <b>Zhang et al. (2018)</b>       | M | U   | 220 | SUB | NA | 67.9  | 187.1 | 301.0 | 8.0 | 10.5 | 0.3 | 32.05 | 21.40 | 6.20  | 21.71 |
| <b>Zhang et al. (2018)</b>       | M | U   | 220 | SUB | IA | 67.9  | 187.1 | 301.0 | 8.0 | 10.5 | 0.3 | 27.83 | 56.17 | 17.24 | 35.39 |
| <b>Zhang et al. (2018)</b>       | M | U   | 220 | SUR | IA | 67.9  | 187.1 | 301.0 | 8.0 | 10.5 | 0.3 | 29.22 | 52.15 | 15.36 | 33.44 |
| <b>Zhang et al. (2018)</b>       | M | U   | 220 | SUB | NA | 67.9  | 187.1 | 301.0 | 8.0 | 10.5 | 0.3 | 33.94 | 29.58 | 6.67  | 24.72 |
| <b>Zhang et al. (2018)</b>       | M | U   | 220 | SUB | IA | 67.9  | 187.1 | 301.0 | 8.0 | 10.5 | 0.3 | 26.54 | 67.77 | 17.68 | 37.17 |
| <b>Zhang et al. (2018)</b>       | M | U   | 220 | SUR | IA | 67.9  | 187.1 | 301.0 | 8.0 | 10.5 | 0.3 | 27.72 | 60.22 | 16.03 | 35.49 |
| <b>Li, <i>et al.</i> [39]</b>    | M | U   | 250 | SUB | NA | 103.9 | 559.8 | 339.0 | 5.5 | 17.6 | 1.2 | 26.96 | 54.04 | 18.43 | 31.22 |
| <b>Li et al. (2015a)</b>         | M | U   | 200 | SUB | NA | 103.9 | 559.8 | 339.0 | 5.5 | 17.6 | 1.2 | 24.80 | 52.28 | 18.94 | 35.24 |

|                                                 |   |   |        |     |    |       |       |       |     |      |     |       |       |       |       |
|-------------------------------------------------|---|---|--------|-----|----|-------|-------|-------|-----|------|-----|-------|-------|-------|-------|
| Li et al. (2015a)                               | M | U | 300    | SUB | NA | 103.9 | 559.8 | 339.0 | 5.5 | 17.6 | 1.2 | 28.42 | 48.03 | 18.69 | 29.34 |
| Li et al. (2015a)                               | M | U | 200    | SUB | NA | 103.9 | 559.8 | 339.0 | 5.5 | 17.6 | 1.2 | 19.55 | 45.34 | 18.76 | 33.21 |
| <b>Wu, Sun, Guo, Huang, Zhang and Zhang [4]</b> |   |   |        |     |    |       |       |       |     |      |     |       |       |       |       |
| Wu et al. (2019)                                | M | U | 90     | SUR | NA | 99.3  | 359.4 | 165.0 | 8.3 | 17.8 | 1.3 | 16.46 | 49.52 | 18.15 | 55.31 |
| Wu et al. (2019)                                | M | U | 90     | SUR | BA | 99.3  | 359.4 | 165.0 | 8.3 | 17.8 | 1.3 | 14.36 | 67.62 | 26.04 | 63.12 |
| Wu et al. (2019)                                | M | U | 90     | SUR | BA | 99.3  | 359.4 | 165.0 | 8.3 | 17.8 | 1.3 | 13.91 | 70.03 | 27.62 | 64.53 |
| Lei, <i>et al.</i> [40]                         | M | U | 256.08 | SUB | NA | 90.9  | 481.1 | 230.0 | 7.9 | 12.2 | 1.2 | 33.57 | 45.13 | 11.40 | 26.82 |
| Lei et al. (2009)                               | M | U | 256.08 | SUB | NA | 90.9  | 481.1 | 230.0 | 7.9 | 12.2 | 1.2 | 32.45 | 51.65 | 12.94 | 28.57 |
| Lei et al. (2009)                               | M | U | 43.92  | SUB | NA | 90.9  | 481.1 | 230.0 | 7.9 | 12.2 | 1.2 | 4.89  | 25.55 | 10.61 | 79.97 |
| Lei et al. (2009)                               | M | U | 43.92  | SUB | NA | 90.9  | 481.1 | 230.0 | 7.9 | 12.2 | 1.2 | 3.01  | 33.20 | 12.45 | 73.31 |
| Lei et al. (2009)                               | M | U | 300    | SUB | NA | 90.9  | 481.1 | 230.0 | 7.9 | 12.2 | 1.2 | 34.20 | 44.37 | 11.59 | 24.24 |
| Lei et al. (2009)                               | M | U | 150    | SUB | NA | 90.9  | 481.1 | 230.0 | 7.9 | 12.2 | 1.2 | 21.35 | 34.97 | 7.73  | 31.13 |
| Lei et al. (2009)                               | M | U | 150    | SUB | NA | 90.9  | 481.1 | 230.0 | 7.9 | 12.2 | 1.2 | 19.98 | 55.73 | 15.80 | 41.52 |
| Lei et al. (2009)                               | M | U | 150    | SUB | NA | 90.9  | 481.1 | 230.0 | 7.9 | 12.2 | 1.2 | 19.53 | 46.82 | 13.72 | 38.30 |
| Lei et al. (2009)                               | M | U | 150    | SUB | NA | 90.9  | 481.1 | 230.0 | 7.9 | 12.2 | 1.2 | 19.53 | 46.82 | 13.72 | 38.30 |
| Lei et al. (2009)                               | M | U | 150    | SUB | NA | 90.9  | 481.1 | 230.0 | 7.9 | 12.2 | 1.2 | 19.53 | 46.82 | 13.72 | 38.30 |
| Lei et al. (2009)                               | M | U | 150    | SUB | NA | 90.9  | 481.1 | 230.0 | 7.9 | 12.2 | 1.2 | 19.53 | 46.82 | 13.72 | 38.30 |
| Lei et al. (2009)                               | M | U | 150    | SUB | NA | 90.9  | 481.1 | 230.0 | 7.9 | 12.2 | 1.2 | 19.53 | 46.82 | 13.72 | 38.30 |
| Lei et al. (2009)                               | M | U | 300    | SUB | NA | 90.9  | 481.1 | 230.0 | 7.9 | 12.2 | 1.2 | 26.69 | 51.40 | 14.62 | 26.47 |
| Han, <i>et al.</i> [41]                         | M | U | 59     | SUB | NA | 92.3  | 331.0 | 230.0 | 7.9 | 12.2 | 1.2 | 11.23 | 30.98 | 12.00 | 32.56 |
| Han et al. (2011)                               | M | U | 59     | SUB | NA | 92.3  | 331.0 | 230.0 | 7.9 | 12.2 | 1.2 | 7.88  | 58.04 | 11.55 | 39.40 |
| Han et al. (2011)                               | M | U | 200    | SUB | NA | 92.3  | 331.0 | 230.0 | 7.9 | 12.2 | 1.2 | 37.81 | 28.85 | 10.96 | 32.56 |
| Han et al. (2011)                               | M | U | 200    | SUB | NA | 92.3  | 331.0 | 230.0 | 7.9 | 12.2 | 1.2 | 27.43 | 50.20 | 8.55  | 40.12 |
| Han et al. (2011)                               | M | U | 200    | SUB | NA | 92.3  | 331.0 | 230.0 | 7.9 | 12.2 | 1.2 | 32.44 | 42.89 | 11.88 | 31.25 |
| Han et al. (2011)                               | M | U | 341    | SUB | NA | 92.3  | 331.0 | 230.0 | 7.9 | 12.2 | 1.2 | 61.81 | 24.14 | 12.33 | 35.15 |
| Han et al. (2011)                               | M | U | 341    | SUB | NA | 92.3  | 331.0 | 230.0 | 7.9 | 12.2 | 1.2 | 48.72 | 35.63 | 12.10 | 33.52 |
| Han et al. (2011)                               | M | U | 400    | SUB | NA | 92.3  | 331.0 | 230.0 | 7.9 | 12.2 | 1.2 | 65.74 | 25.18 | 14.20 | 40.12 |

|                          |   |      |       |     |    |       |       |       |     |      |     |       |       |       |       |
|--------------------------|---|------|-------|-----|----|-------|-------|-------|-----|------|-----|-------|-------|-------|-------|
| Han et al. (2011)        | M | U    | 300   | SUB | NA | 92.3  | 331.0 | 230.0 | 7.9 | 12.2 | 1.2 | 55.05 | 25.78 | 13.25 | 33.11 |
| Li, <i>et al.</i> [42]   | M | U    | 150   | SUB | NA | 114.3 | 314.8 | 43.0  | 8.7 | 17.9 | 1.3 | 24.31 | 53.44 | 16.35 | 38.73 |
| Li et al. (2007)         | M | U    | 150   | SUB | NA | 114.3 | 314.8 | 43.0  | 8.7 | 17.9 | 1.3 | 24.54 | 48.24 | 15.68 | 37.92 |
| Li et al. (2007)         | M | U    | 150   | SUB | NA | 114.3 | 314.8 | 43.0  | 8.7 | 17.9 | 1.3 | 23.37 | 56.03 | 17.75 | 40.06 |
| Li et al. (2007)         | M | U    | 150   | SUB | NA | 114.3 | 314.8 | 43.0  | 8.7 | 17.9 | 1.3 | 22.57 | 63.81 | 19.56 | 42.00 |
| Yan, <i>et al.</i> [43]  | M | U    | 240   | SUB | NA | 110.9 | 387.9 | 339.0 | 6.6 | 29.6 | 1.7 | 35.70 | 31.83 | 8.58  | 23.26 |
| Yan et al. (2016)        | M | U    | 215.4 | SUB | MA | 110.9 | 387.9 | 339.0 | 6.6 | 29.6 | 1.7 | 30.90 | 37.18 | 10.41 | 26.77 |
| Yan et al. (2016)        | M | IU   | 240   | SUB | NA | 110.9 | 387.9 | 339.0 | 6.6 | 29.6 | 1.7 | 33.77 | 40.31 | 10.24 | 25.05 |
| Han, <i>et al.</i> [44]  | M | UOCF | 224   | SUB | NA | 113.1 | 440.9 | 263.0 | 7.1 | 21.6 | 1.6 | 20.45 | 25.89 | 10.90 | 36.68 |
| Han et al. (2016)        | M | IU   | 224   | SUB | NA | 113.1 | 440.9 | 263.0 | 7.1 | 21.6 | 1.6 | 22.20 | 33.12 | 10.91 | 38.10 |
| Han et al. (2016)        | M | IU   | 224   | SUB | NA | 113.1 | 440.9 | 263.0 | 7.1 | 21.6 | 1.6 | 19.84 | 34.02 | 9.23  | 33.86 |
| Han et al. (2016)        | M | IU   | 224   | SUB | NA | 113.1 | 440.9 | 263.0 | 7.1 | 21.6 | 1.6 | 22.54 | 33.56 | 10.15 | 37.25 |
| Han et al. (2016)        | M | IU   | 224   | SUB | NA | 113.1 | 440.9 | 263.0 | 7.1 | 21.6 | 1.6 | 21.69 | 33.05 | 11.58 | 38.67 |
| Han et al. (2016)        | M | IU   | 224   | SUB | NA | 113.1 | 440.9 | 263.0 | 7.1 | 21.6 | 1.6 | 21.00 | 34.12 | 12.89 | 39.99 |
| Han et al. (2016)        | M | IU   | 224   | SUB | NA | 113.1 | 440.9 | 263.0 | 7.1 | 21.6 | 1.6 | 21.99 | 32.55 | 11.20 | 38.36 |
| Han et al. (2016)        | M | IU   | 224   | SUB | NA | 113.1 | 440.9 | 263.0 | 7.1 | 21.6 | 1.6 | 20.72 | 35.61 | 13.40 | 40.49 |
| Han et al. (2016)        | M | IU   | 224   | SUB | NA | 113.1 | 440.9 | 263.0 | 7.1 | 21.6 | 1.6 | 22.13 | 34.56 | 10.79 | 37.87 |
| Song, <i>et al.</i> [45] | M | U    | 180   | SUB | NA | 106.0 | 592.6 | 227.0 | 5.5 | 25.7 | 1.4 | 14.14 | 51.06 | 27.57 | 36.91 |
| Song et al. (2018)       | M | IU   | 180   | SUB | NA | 106.0 | 592.6 | 227.0 | 5.5 | 25.7 | 1.4 | 13.86 | 50.02 | 26.66 | 35.84 |
| Song et al. (2018)       | M | IU   | 144   | SUB | NA | 106.0 | 592.6 | 227.0 | 5.5 | 25.7 | 1.4 | 9.97  | 67.30 | 32.61 | 43.70 |
| Li, <i>et al.</i> [46]   | M | U    | 224   | SUB | NA | 104.1 | 553.9 | 227.0 | 7.9 | 17.6 | 1.2 | 21.15 | 47.21 | 4.76  | 30.11 |
| Li et al. (2015e)        | M | IU   | 224   | SUB | NA | 104.1 | 553.9 | 227.0 | 7.9 | 17.6 | 1.2 | 20.76 | 43.74 | 4.77  | 29.84 |
| Li et al. (2015e)        | M | U    | 224   | SUB | NA | 104.1 | 553.9 | 227.0 | 7.9 | 17.6 | 1.2 | 20.52 | 47.14 | 6.61  | 32.38 |
| Li et al. (2015e)        | M | IU   | 224   | SUB | NA | 104.1 | 553.9 | 227.0 | 7.9 | 17.6 | 1.2 | 22.13 | 54.47 | 5.02  | 31.18 |
| Li et al. (2015e)        | M | IU   | 224   | SUB | NA | 104.1 | 553.9 | 227.0 | 7.9 | 17.6 | 1.2 | 21.77 | 63.46 | 6.06  | 32.50 |
| Li et al. (2015e)        | M | IU   | 224   | SUB | IA | 104.1 | 553.9 | 227.0 | 7.9 | 17.6 | 1.2 | 21.30 | 55.27 | 6.32  | 32.54 |
| Wang, <i>et al.</i> [47] | M | U    | 225   | SUR | NA | 113.3 | 363.4 | 360.0 | 7.1 | 22.3 | 1.6 | 22.25 | 52.10 | 15.19 | 30.76 |
| Wang et al. (2009a)      | M | U    | 98    | SUR | NA | 113.3 | 363.4 | 360.0 | 7.1 | 22.3 | 1.6 | 14.78 | 39.48 | 13.60 | 51.77 |

|                           |   |     |       |     |    |       |       |       |     |      |     |       |       |       |       |
|---------------------------|---|-----|-------|-----|----|-------|-------|-------|-----|------|-----|-------|-------|-------|-------|
| Wang et al. (2009a)       | M | U   | 225   | SUR | NA | 113.3 | 363.4 | 360.0 | 7.1 | 22.3 | 1.6 | 26.38 | 45.14 | 14.17 | 30.97 |
| Wang et al. (2009a)       | M | U   | 157   | SUR | NA | 113.3 | 363.4 | 360.0 | 7.1 | 22.3 | 1.6 | 22.53 | 42.05 | 12.51 | 36.93 |
| Wang et al. (2009a)       | M | OA  | 225   | SUR | NA | 113.3 | 363.4 | 360.0 | 7.1 | 22.3 | 1.6 | 24.84 | 67.17 | 17.98 | 35.13 |
| Wang et al. (2009a)       | M | OA  | 98    | SUR | NA | 113.3 | 363.4 | 360.0 | 7.1 | 22.3 | 1.6 | 15.05 | 64.01 | 20.87 | 61.62 |
| Wang et al. (2009a)       | M | OA  | 225   | SUR | NA | 113.3 | 363.4 | 360.0 | 7.1 | 22.3 | 1.6 | 24.09 | 62.30 | 17.63 | 34.36 |
| Wang et al. (2009a)       | M | OA  | 157   | SUR | NA | 113.3 | 363.4 | 360.0 | 7.1 | 22.3 | 1.6 | 21.11 | 53.15 | 14.66 | 38.49 |
| Chen, <i>et al.</i> [48]  | M | U   | 150   | SUR | NA | 108.0 | 385.8 | 339.0 | 6.8 | 20.1 | 1.1 | 23.40 | 36.42 | 13.35 | 38.45 |
| Chen et al. (2015)        | M | U   | 225   | SUR | NA | 108.0 | 385.8 | 339.0 | 6.8 | 20.1 | 1.1 | 26.67 | 50.76 | 17.07 | 33.69 |
| Chen et al. (2015)        | M | U   | 300   | SUR | NA | 108.0 | 385.8 | 339.0 | 6.8 | 20.1 | 1.1 | 32.84 | 50.39 | 14.89 | 27.31 |
| Chen et al. (2015)        | M | U   | 225   | SUR | NA | 108.0 | 385.8 | 339.0 | 6.8 | 20.1 | 1.1 | 26.23 | 49.53 | 18.13 | 34.89 |
| Ji, <i>et al.</i> [49]    | M | U   | 150   | SUR | NA | 108.4 | 359.8 | 339.0 | 6.8 | 12.1 | 1.1 | 23.40 | 38.93 | 13.35 | 38.45 |
| Ji et al. (2009)          | M | U   | 225   | SUR | NA | 108.4 | 359.8 | 339.0 | 6.8 | 12.1 | 1.1 | 26.67 | 52.43 | 17.07 | 33.69 |
| Ji et al. (2009)          | M | U   | 300   | SUR | NA | 108.4 | 359.8 | 339.0 | 6.8 | 12.1 | 1.1 | 32.84 | 51.63 | 14.89 | 27.31 |
| Ji et al. (2009)          | M | U   | 225   | SUR | NA | 108.4 | 359.8 | 339.0 | 6.8 | 12.1 | 1.1 | 26.23 | 51.21 | 18.13 | 34.89 |
| Zhao, <i>et al.</i> [50]  | M | OA  | 187.5 | SUR | NA | 107.1 | 445.8 | 421.0 | 6.4 | 7.3  | 0.3 | 32.59 | 42.45 | 6.18  | 28.62 |
| Zhao et al. (2010b)       | M | OA  | 262.5 | SUR | NA | 107.1 | 445.8 | 421.0 | 6.4 | 7.3  | 0.3 | 37.30 | 23.59 | 8.86  | 24.67 |
| Zhao et al. (2010b)       | M | OCF | 187.5 | SUR | NA | 107.1 | 445.8 | 421.0 | 6.4 | 7.3  | 0.3 | 27.51 | 38.03 | 11.46 | 33.90 |
| Zhao et al. (2010b)       | M | OCF | 262.5 | SUR | NA | 107.1 | 445.8 | 421.0 | 6.4 | 7.3  | 0.3 | 32.97 | 21.12 | 12.09 | 27.91 |
| Zhao et al. (2010b)       | M | OA  | 187.5 | SUR | NA | 107.1 | 445.8 | 421.0 | 6.4 | 7.3  | 0.3 | 27.09 | 41.06 | 11.99 | 34.43 |
| Ba, <i>et al.</i> [51]    | M | U   | 240   | SUB | NA | 122.1 | 406.4 | 379.0 | 6.6 | 14.6 | 1.3 | 32.73 | 50.49 | 8.18  | 24.89 |
| Ba et al. (2018)          | M | IU  | 240   | SUB | NA | 122.1 | 406.4 | 379.0 | 6.6 | 14.6 | 1.3 | 31.77 | 67.82 | 11.69 | 29.54 |
| Ba et al. (2018)          | M | IU  | 240   | SUB | IA | 122.1 | 406.4 | 379.0 | 6.6 | 14.6 | 1.3 | 29.28 | 81.68 | 14.25 | 32.11 |
| Ba et al. (2018)          | M | IU  | 240   | SUB | IA | 122.1 | 406.4 | 379.0 | 6.6 | 14.6 | 1.3 | 28.53 | 86.53 | 14.83 | 32.59 |
| Ba et al. (2018)          | M | IU  | 240   | SUB | IA | 122.1 | 406.4 | 379.0 | 6.6 | 14.6 | 1.3 | 29.15 | 81.34 | 14.19 | 31.98 |
| Cheng, <i>et al.</i> [52] | M | U   | 160   | SUR | NA | 105.1 | 295.9 | 371.0 | 8.1 | 18.8 | 1.4 | 21.90 | 40.49 | 13.96 | 33.28 |
| Cheng et al. (2016)       | M | U   | 160   | SUR | BA | 106.8 | 378.5 | 371.0 | 8.1 | 18.8 | 1.4 | 21.71 | 47.78 | 16.60 | 36.68 |
| Cheng et al. (2016)       | M | U   | 160   | SUR | BA | 106.8 | 378.5 | 371.0 | 8.1 | 18.8 | 1.4 | 27.49 | 27.04 | 9.92  | 30.47 |
| Jiang, <i>et al.</i> [53] | M | U   | 240   | SUB | NA | 109.4 | 397.5 | 371.0 | 5.4 | 18.1 | 1.2 | 27.87 | 52.90 | 11.01 | 27.93 |

|                                              |   |     |       |     |    |       |       |       |     |      |     |       |       |       |       |
|----------------------------------------------|---|-----|-------|-----|----|-------|-------|-------|-----|------|-----|-------|-------|-------|-------|
| <b>Jiang et al. (2019)</b>                   | M | IU  | 240   | SUB | NA | 109.4 | 397.5 | 371.0 | 5.4 | 18.1 | 1.2 | 25.91 | 70.53 | 15.07 | 32.62 |
| <b>Jiang et al. (2019)</b>                   | M | IU  | 210   | SUB | NA | 109.4 | 397.5 | 371.0 | 5.4 | 18.1 | 1.2 | 26.96 | 53.70 | 10.78 | 30.66 |
| <b>Jiang et al. (2019)</b>                   | M | IU  | 180   | SUB | NA | 109.4 | 397.5 | 371.0 | 5.4 | 18.1 | 1.2 | 24.39 | 50.08 | 10.21 | 33.23 |
| <b>Yang and Yang [54]</b>                    | M | U   | 300   | SUB | MA | 73.8  | 128.3 | 123.0 | 8.3 | 11.2 | 1.0 | 30.96 | 46.49 | 9.71  | 28.06 |
| <b>Yang and Yang (2017)</b>                  | M | U   | 300   | SUB | MA | 73.8  | 128.3 | 123.0 | 8.3 | 11.2 | 1.0 | 28.34 | 53.15 | 12.36 | 30.74 |
| <b>Yang and Yang (2017)</b>                  | M | U   | 300   | SUB | NA | 73.8  | 128.3 | 123.0 | 8.3 | 11.2 | 1.0 | 38.26 | 27.71 | 4.06  | 22.24 |
| <b>Yang and Yang (2017)</b>                  | M | OCF | 140   | SUB | NA | 73.8  | 128.3 | 123.0 | 8.3 | 11.2 | 1.0 | 17.56 | 32.35 | 9.38  | 49.37 |
| <b>Yang and Yang (2017)</b>                  | M | U   | 300   | SUB | IA | 73.8  | 128.3 | 123.0 | 8.3 | 11.2 | 1.0 | 37.06 | 36.83 | 4.29  | 22.19 |
| <b>Yang and Yang (2017)</b>                  | M | U   | 300   | SUB | MA | 73.8  | 128.3 | 123.0 | 8.3 | 11.2 | 1.0 | 37.49 | 33.57 | 4.60  | 22.83 |
| <b>Yang and Yang (2017)</b>                  | M | U   | 300   | SUB | MA | 73.8  | 128.3 | 123.0 | 8.3 | 11.2 | 1.0 | 37.31 | 32.71 | 4.36  | 22.38 |
| <b>Xu, et al. [9]</b>                        | M | U   | 241.5 | SUB | NA | 73.8  | 128.3 | 123.0 | 8.3 | 11.2 | 1.0 | 24.82 | 59.53 | 15.03 | 32.26 |
| <b>Xu et al. (2009b)</b>                     | M | U   | 151.8 | SUB | NA | 73.8  | 128.3 | 123.0 | 8.3 | 11.2 | 1.0 | 17.97 | 65.46 | 18.02 | 45.78 |
| <b>Xu et al. (2009b)</b>                     | M | U   | 84.9  | SUB | NA | 73.8  | 128.3 | 123.0 | 8.3 | 11.2 | 1.0 | 14.51 | 24.51 | 5.25  | 53.73 |
| <b>Xu et al. (2009b)</b>                     | M | U   | 216.7 | SUB | NA | 73.8  | 128.3 | 123.0 | 8.3 | 11.2 | 1.0 | 23.67 | 58.45 | 16.27 | 36.03 |
| <b>Liu, Ju, Zhang, Pan and Christie [12]</b> | M | U   | 60    | SUB | NA | 74.9  | 226.0 | 170.0 | 7.8 | 26.7 | 1.4 | 13.58 | 29.01 | 5.11  | 53.36 |
| <b>Liu et al. (2003)</b>                     | M | U   | 120   | SUB | NA | 74.9  | 226.0 | 170.0 | 7.8 | 26.7 | 1.4 | 25.27 | 34.96 | 6.70  | 31.14 |
| <b>Liu et al. (2003)</b>                     | M | U   | 180   | SUB | NA | 74.9  | 226.0 | 170.0 | 7.8 | 26.7 | 1.4 | 34.48 | 36.04 | 6.96  | 23.27 |
| <b>Yang, Liu, Dong, Zhang and Zhao [13]</b>  | M | U   | 120   | SUB | NA | 53.5  | 98.6  | 170.0 | 7.9 | 26.7 | 1.4 | 27.43 | 31.59 | 7.36  | 33.02 |
| <b>Yang et al. (2019)</b>                    | M | U   | 240   | SUB | NA | 53.5  | 98.6  | 170.0 | 7.9 | 26.7 | 1.4 | 43.76 | 46.24 | 8.04  | 20.86 |
| <b>Yang et al. (2019)</b>                    | M | U   | 360   | SUB | NA | 53.5  | 98.6  | 170.0 | 7.9 | 26.7 | 1.4 | 56.64 | 26.35 | 7.48  | 15.98 |
| <b>Yang, et al. [55]</b>                     | M | OA  | 200   | SUR | NA | 100.4 | 633.1 | 140.0 | 7.3 | 10.8 | 0.8 | 27.38 | 64.93 | 5.97  | 33.27 |
| <b>Yang et al. (2015b)</b>                   | M | OA  | 100   | SUB | NA | 100.4 | 633.1 | 140.0 | 7.3 | 10.8 | 0.8 | 14.12 | 61.99 | 6.03  | 59.49 |
| <b>Yang et al. (2015b)</b>                   | M | U   | 200   | SUR | NA | 102.0 | 426.9 | 140.0 | 7.3 | 10.8 | 0.8 | 22.80 | 64.16 | 8.02  | 33.08 |
| <b>Yang et al. (2015b)</b>                   | M | U   | 100   | SUR | NA | 102.0 | 426.9 | 140.0 | 7.3 | 10.8 | 0.8 | 11.05 | 61.91 | 8.59  | 55.43 |
| <b>Yang et al. (2015b)</b>                   | M | OA  | 200   | SUB | NA | 100.4 | 633.1 | 140.0 | 7.3 | 10.8 | 0.8 | 27.47 | 62.53 | 5.38  | 32.36 |

|                          |   |    |     |     |    |       |       |       |     |      |     |       |       |       |       |
|--------------------------|---|----|-----|-----|----|-------|-------|-------|-----|------|-----|-------|-------|-------|-------|
| Yang et al. (2015b)      | M | OA | 100 | SUB | NA | 100.4 | 633.1 | 140.0 | 7.3 | 10.8 | 0.8 | 14.21 | 58.31 | 4.70  | 57.48 |
| Yang et al. (2015b)      | M | U  | 200 | SUR | NA | 102.0 | 426.9 | 140.0 | 7.3 | 10.8 | 0.8 | 24.04 | 60.90 | 6.80  | 32.11 |
| Yang et al. (2015b)      | M | U  | 100 | SUR | NA | 102.0 | 426.9 | 140.0 | 7.3 | 10.8 | 0.8 | 11.60 | 58.76 | 7.01  | 54.39 |
| Yang et al. (2015b)      | M | OA | 200 | SUB | NA | 100.4 | 633.1 | 140.0 | 7.3 | 10.8 | 0.8 | 28.17 | 59.53 | 4.45  | 31.35 |
| Yang et al. (2015b)      | M | OA | 100 | SUB | NA | 100.4 | 633.1 | 140.0 | 7.3 | 10.8 | 0.8 | 14.22 | 56.28 | 4.00  | 56.31 |
| Yang et al. (2015b)      | M | U  | 200 | SUR | NA | 102.0 | 426.9 | 140.0 | 7.3 | 10.8 | 0.8 | 24.58 | 55.17 | 5.16  | 29.97 |
| Yang et al. (2015b)      | M | U  | 100 | SUR | NA | 102.0 | 426.9 | 140.0 | 7.3 | 10.8 | 0.8 | 11.50 | 53.29 | 5.10  | 51.29 |
| Yang et al. (2015b)      | M | OA | 200 | SUB | NA | 100.4 | 633.1 | 140.0 | 7.3 | 10.8 | 0.8 | 29.59 | 57.25 | 3.50  | 30.79 |
| Yang et al. (2015b)      | M | OA | 100 | SUB | NA | 100.4 | 633.1 | 140.0 | 7.3 | 10.8 | 0.8 | 15.22 | 54.78 | 2.62  | 56.78 |
| Yang et al. (2015b)      | M | U  | 200 | SUR | NA | 102.0 | 426.9 | 140.0 | 7.3 | 10.8 | 0.8 | 25.03 | 65.50 | 8.61  | 35.63 |
| Yang et al. (2015b)      | M | U  | 100 | SUR | NA | 102.0 | 426.9 | 140.0 | 7.3 | 10.8 | 0.8 | 11.09 | 55.06 | 8.05  | 54.74 |
| Lin, <i>et al.</i> [56]  | M | U  | 330 | SUB | NA | 95.2  | 668.3 | 122.5 | 7.5 | 12.6 | 0.8 | 26.23 | 46.16 | 6.44  | 19.22 |
| Lin et al. (2011)        | M | U  | 240 | SUB | NA | 95.2  | 668.3 | 122.5 | 7.5 | 12.6 | 0.8 | 21.42 | 66.50 | 10.56 | 29.77 |
| Lin et al. (2011)        | M | U  | 168 | SUB | NA | 95.2  | 668.3 | 122.5 | 7.5 | 12.6 | 0.8 | 17.42 | 64.76 | 17.29 | 48.39 |
| Yang, <i>et al.</i> [57] | M | U  | 200 | SUB | NA | 100.4 | 633.1 | 128.0 | 7.2 | 19.4 | 1.5 | 21.03 | 40.43 | 12.35 | 34.47 |
| Yang et al. (2018)       | M | OA | 200 | SUB | NA | 100.4 | 633.1 | 128.0 | 7.2 | 19.4 | 1.5 | 23.68 | 37.25 | 12.85 | 36.87 |
| Yang et al. (2018)       | M | OA | 200 | SUB | NA | 100.4 | 633.1 | 128.0 | 7.2 | 19.4 | 1.5 | 21.17 | 50.47 | 14.08 | 36.94 |
| Yang et al. (2018)       | M | U  | 200 | SUB | NA | 102.0 | 426.9 | 128.0 | 7.2 | 19.4 | 1.5 | 22.07 | 48.34 | 10.62 | 33.93 |
| Yang et al. (2018)       | M | OA | 200 | SUB | NA | 102.0 | 426.9 | 128.0 | 7.2 | 19.4 | 1.5 | 25.88 | 46.79 | 9.60  | 35.00 |
| Yang et al. (2018)       | M | OA | 200 | SUB | NA | 102.0 | 426.9 | 128.0 | 7.2 | 19.4 | 1.5 | 21.46 | 54.61 | 13.00 | 36.88 |
| Lu, <i>et al.</i> [58]   | M | U  | 210 | SUR | NA | 95.1  | 473.0 | 128.0 | 8.5 | 6.2  | 0.4 | 33.36 | 51.12 | 2.16  | 25.50 |
| Lu et al. (2010)         | M | U  | 300 | SUR | NA | 95.1  | 473.0 | 128.0 | 8.5 | 6.2  | 0.4 | 42.60 | 50.34 | 3.34  | 19.36 |
| Lu et al. (2010)         | M | IU | 210 | SUR | NA | 95.1  | 473.0 | 128.0 | 8.5 | 6.2  | 0.4 | 33.27 | 56.42 | 2.78  | 26.52 |
| Lu et al. (2010)         | M | IU | 300 | SUR | NA | 95.1  | 473.0 | 128.0 | 8.5 | 6.2  | 0.4 | 42.99 | 56.36 | 4.08  | 20.66 |
| Lu et al. (2010)         | M | IU | 210 | SUR | NA | 95.1  | 473.0 | 128.0 | 8.5 | 6.2  | 0.4 | 32.65 | 59.22 | 3.56  | 27.49 |
| Lu et al. (2010)         | M | IU | 300 | SUR | NA | 95.1  | 473.0 | 128.0 | 8.5 | 6.2  | 0.4 | 42.04 | 58.88 | 4.72  | 21.39 |
| Liu, <i>et al.</i> [59]  | M | U  | 250 | SUR | NA | 101.8 | 295.8 | 128.0 | 8.5 | 12.2 | 0.8 | 43.87 | 16.01 | 0.00  | 19.61 |
| Liu et al. (2016)        | M | U  | 250 | SUR | NA | 101.8 | 295.8 | 128.0 | 8.5 | 12.2 | 0.8 | 41.27 | 16.87 | 0.65  | 19.81 |

|                                      |   |     |     |     |    |       |       |       |      |      |     |        |       |       |       |
|--------------------------------------|---|-----|-----|-----|----|-------|-------|-------|------|------|-----|--------|-------|-------|-------|
| Liu et al. (2016)                    | M | U   | 250 | SUB | NA | 101.8 | 295.8 | 128.0 | 8.5  | 12.2 | 0.8 | 44.01  | 17.77 | 0.46  | 20.51 |
| Zhao, et al. [60]                    | M | U   | 100 | SUR | NA | 98.1  | 785.1 | 126.0 | 7.9  | 10.3 | 1.0 | 13.56  | 34.99 | 11.24 | 60.45 |
| Zhao et al. (2009a)                  | M | U   | 150 | SUR | NA | 98.1  | 785.1 | 126.0 | 7.9  | 10.3 | 1.0 | 19.71  | 38.09 | 7.19  | 39.01 |
| Zhao et al. (2009a)                  | M | U   | 225 | SUR | NA | 98.1  | 785.1 | 126.0 | 7.9  | 10.3 | 1.0 | 151.48 | 46.13 | 6.51  | 5.07  |
| Zhao et al. (2009a)                  | M | U   | 300 | SUR | NA | 98.1  | 785.1 | 126.0 | 7.9  | 10.3 | 1.0 | 34.15  | 50.11 | 5.53  | 20.91 |
| Zhao et al. (2009a)                  | M | U   | 150 | SUB | NA | 98.7  | 439.9 | 126.0 | 7.9  | 10.3 | 1.0 | 19.66  | 45.41 | 7.04  | 38.72 |
| Zhao et al. (2009a)                  | M | U   | 225 | SUB | NA | 98.7  | 439.9 | 126.0 | 7.9  | 10.3 | 1.0 | 25.74  | 59.40 | 6.89  | 27.26 |
| Zhao et al. (2009a)                  | M | U   | 300 | SUB | NA | 98.7  | 439.9 | 126.0 | 7.9  | 10.3 | 1.0 | 34.12  | 54.25 | 5.52  | 20.89 |
| Zhou, Yang, Bai, Lu, Wang and Ni     |   |     |     |     |    |       |       |       |      |      |     |        |       |       |       |
| [19]                                 | M | OCF | 180 | SUB | NA | 96.6  | 312.2 | 245.0 | 8.2  | 5.6  | 0.2 | 28.98  | 47.71 | 4.99  | 33.94 |
| Zhou et al. (2016)                   | M | U   | 180 | SUB | NA | 96.6  | 312.2 | 245.0 | 8.2  | 5.6  | 0.2 | 29.57  | 44.00 | 2.88  | 30.74 |
| Zhou et al. (2016)                   | M | IU  | 180 | SUB | NA | 97.2  | 310.4 | 245.0 | 8.2  | 5.6  | 0.2 | 26.34  | 59.35 | 7.12  | 35.28 |
| Zhou et al. (2016)                   | M | IU  | 180 | SUB | NA | 97.2  | 310.4 | 245.0 | 8.2  | 5.6  | 0.2 | 26.34  | 59.34 | 7.12  | 35.27 |
| Zhou et al. (2016)                   | M | IU  | 180 | SUB | NA | 96.6  | 312.2 | 245.0 | 8.2  | 5.6  | 0.2 | 25.88  | 62.63 | 8.16  | 36.57 |
| Zhou et al. (2016)                   | M | IU  | 180 | SUB | NA | 97.2  | 310.4 | 245.0 | 8.2  | 5.6  | 0.2 | 25.76  | 65.26 | 8.93  | 37.69 |
| Ma, Ji, Li, Zhang, Ju and Zhang [21] |   |     |     |     |    |       |       |       |      |      |     |        |       |       |       |
| Ju and Zhang [21]                    | M | U   | 135 | SUR | NA | 101.3 | 301.1 | 421.0 | 8.6  | 10.2 | 1.0 | 22.04  | 31.25 | 6.11  | 36.80 |
| Ma et al. (2012)                     | M | U   | 270 | SUR | NA | 101.3 | 301.1 | 421.0 | 8.6  | 10.2 | 1.0 | 36.03  | 56.95 | 8.04  | 23.63 |
| Ma et al. (2012)                     | M | U   | 405 | SUR | NA | 101.3 | 301.1 | 421.0 | 8.6  | 10.2 | 1.0 | 46.96  | 51.36 | 8.14  | 18.65 |
| Ma et al. (2012)                     | M | U   | 540 | SUR | NA | 101.3 | 301.1 | 421.0 | 8.6  | 10.2 | 1.0 | 59.21  | 43.40 | 6.70  | 14.50 |
| Wang, et al. [22]                    | M | U   | 300 | SUR | NA | 97.3  | 439.5 | 315.0 | 8.6  | 8.9  | 0.8 | 32.13  | 37.18 | 10.05 | 26.26 |
| Wang et al. (2009b)                  | M | U   | 210 | SUR | NA | 97.3  | 439.5 | 315.0 | 8.6  | 8.9  | 0.8 | 22.77  | 40.80 | 14.00 | 37.33 |
| Wang et al. (2009b)                  | M | U   | 210 | SUR | NA | 97.3  | 439.5 | 315.0 | 8.6  | 8.9  | 0.8 | 22.63  | 45.43 | 15.04 | 38.70 |
| An, et al. [61]                      | M | U   | 240 | SUB | NA | 97.3  | 412.2 | 22.3  | 26.1 | 7.0  | 1.6 | 22.09  | 52.48 | 5.56  | 39.81 |
| An et al. (2020)                     | M | IU  | 180 | SUB | NA | 97.3  | 412.2 | 22.3  | 26.1 | 7.0  | 1.6 | 17.84  | 53.77 | 6.49  | 54.50 |
| An et al. (2020)                     | M | IU  | 180 | SUB | NA | 97.3  | 412.2 | 22.3  | 26.1 | 7.0  | 1.6 | 18.67  | 53.06 | 4.23  | 52.37 |
| An et al. (2020)                     | M | IU  | 180 | SUB | NA | 97.3  | 412.2 | 22.3  | 26.1 | 7.0  | 1.6 | 18.20  | 58.81 | 5.53  | 53.63 |

|                                            |   |    |        |     |    |       |       |       |      |      |     |       |       |       |        |
|--------------------------------------------|---|----|--------|-----|----|-------|-------|-------|------|------|-----|-------|-------|-------|--------|
| <b>Shan, <i>et al.</i> [62]</b>            | M | U  | 50     | SUB | NA | 97.3  | 332.9 | 21.6  | 15.8 | 8.3  | 0.9 | 4.52  | 48.76 | 19.37 | 163.21 |
| <b>Shan et al. (2020)</b>                  | M | U  | 100    | SUB | NA | 97.3  | 332.9 | 21.6  | 15.8 | 8.3  | 0.9 | 8.62  | 60.39 | 20.68 | 93.72  |
| <b>Shan et al. (2020)</b>                  | M | U  | 150    | SUB | NA | 97.3  | 332.9 | 21.6  | 15.8 | 8.3  | 0.9 | 12.47 | 59.25 | 18.24 | 67.44  |
| <b>Shan et al. (2020)</b>                  | M | U  | 200    | SUB | NA | 97.3  | 332.9 | 21.6  | 15.8 | 8.3  | 0.9 | 17.04 | 60.14 | 13.48 | 50.67  |
| <b>Shan et al. (2020)</b>                  | M | U  | 250    | SUB | NA | 97.3  | 332.9 | 21.6  | 15.8 | 8.3  | 0.9 | 23.22 | 49.57 | 7.76  | 37.60  |
| <b>Shan et al. (2020)</b>                  | M | U  | 300    | SUB | NA | 97.3  | 332.9 | 21.6  | 15.8 | 8.3  | 0.9 | 28.84 | 40.12 | 4.49  | 28.73  |
| <b>Shan et al. (2020)</b>                  | M | U  | 400    | SUB | NA | 97.3  | 332.9 | 21.6  | 15.8 | 8.3  | 0.9 | 40.14 | 29.95 | 2.66  | 20.92  |
| <b>Meng, Wang, Pang and Zou [24]</b>       |   |    |        |     |    |       |       |       |      |      |     |       |       |       |        |
| <b>Meng et al. (2021)</b>                  | M | OA | 198.35 | SUB | NA | 97.5  | 480.0 | 23.3  | 9.2  | 5.8  | 1.1 | 19.13 | 51.27 | 4.26  | 36.97  |
| <b>Meng et al. (2021)</b>                  | M | OA | 198.35 | SUB | NA | 97.5  | 480.0 | 23.3  | 9.2  | 5.8  | 1.1 | 19.21 | 43.83 | 2.55  | 34.36  |
| <b>Meng et al. (2021)</b>                  | M | OA | 198.35 | SUB | NA | 97.5  | 480.0 | 23.3  | 9.2  | 5.8  | 1.1 | 15.84 | 61.37 | 9.93  | 41.75  |
| <b>Liu, <i>et al.</i> [63]</b>             | M | IU | 180    | SUR | NA | 107.8 | 476.1 | 270.0 | 7.3  | 39.6 | 1.8 | 15.86 | 35.97 | 2.78  | 48.41  |
| <b>Liu et al. (2019)</b>                   | M | IU | 180    | SUB | NA | 107.8 | 476.1 | 270.0 | 7.3  | 39.6 | 1.8 | 16.58 | 44.07 | 4.96  | 53.79  |
| <b>Liu et al. (2019)</b>                   | M | IU | 180    | SUB | NA | 107.8 | 476.1 | 270.0 | 7.3  | 39.6 | 1.8 | 16.49 | 46.03 | 5.99  | 55.37  |
| <b>Liu et al. (2019)</b>                   | M | IU | 180    | SUB | NA | 107.8 | 476.1 | 270.0 | 7.3  | 39.6 | 1.8 | 16.22 | 48.83 | 6.26  | 55.17  |
| <b>Liu et al. (2019)</b>                   | M | IU | 180    | SUB | NA | 107.8 | 476.1 | 270.0 | 7.3  | 39.6 | 1.8 | 17.61 | 42.37 | 2.04  | 51.05  |
| <b>Yan, <i>et al.</i> [64]</b>             | M | U  | 240    | SUB | NA | 116.9 | 340.7 | 176.0 | 58.0 | 62.5 | 3.5 | 24.52 | 38.58 | 14.53 | 29.61  |
| <b>Yan et al. (2014)</b>                   | M | IU | 240    | SUB | NA | 116.9 | 340.7 | 176.0 | 58.0 | 62.5 | 3.5 | 25.95 | 51.04 | 17.93 | 34.49  |
| <b>Yan et al. (2014)</b>                   | M | IU | 216    | SUB | NA | 116.9 | 340.7 | 176.0 | 58.0 | 62.5 | 3.5 | 24.39 | 47.36 | 17.89 | 36.22  |
| <b>Yan et al. (2014)</b>                   | M | IU | 192    | SUB | NA | 116.9 | 340.7 | 176.0 | 58.0 | 62.5 | 3.5 | 22.55 | 46.32 | 18.02 | 38.56  |
| <b>Yan et al. (2014)</b>                   | M | IU | 168    | SUB | NA | 116.9 | 340.7 | 176.0 | 58.0 | 62.5 | 3.5 | 20.92 | 43.69 | 17.37 | 40.71  |
| <b>Xie, <i>et al.</i> [65]</b>             | M | U  | 240    | SUR | NA | 108.0 | 577.0 | 236.0 | 5.8  | 62.2 | 3.5 | 29.86 | 36.88 | 11.80 | 26.85  |
| <b>Xie et al. (2016)</b>                   | M | IU | 240    | SUR | NA | 108.0 | 577.0 | 236.0 | 5.8  | 62.2 | 3.5 | 27.75 | 44.29 | 13.37 | 28.28  |
| <b>Xie et al. (2016)</b>                   | M | IU | 216    | SUR | NA | 108.0 | 577.0 | 236.0 | 5.8  | 62.2 | 3.5 | 25.59 | 42.60 | 13.90 | 30.46  |
| <b>Xie et al. (2016)</b>                   | M | IU | 192    | SUR | NA | 108.0 | 577.0 | 236.0 | 5.8  | 62.2 | 3.5 | 23.03 | 44.55 | 15.18 | 33.87  |
| <b>Xie et al. (2016)</b>                   | M | IU | 168    | SUR | NA | 108.0 | 577.0 | 236.0 | 5.8  | 62.2 | 3.5 | 20.57 | 43.26 | 16.29 | 37.67  |
| <b>Huang, Duan, Xu, Zhai, Zhang, Wang,</b> |   |    |        |     |    |       |       |       |      |      |     |       |       |       |        |
|                                            | M | U  | 300    | SUB | NA | 101.1 | 457.2 | 595.0 | 7.6  | 13.6 | 1.1 | 35.19 | 50.34 | 9.95  | 22.62  |



### Zhang, Gao and Sun [25]

|                      |   |    |     |     |    |       |       |       |     |      |     |       |       |       |       |
|----------------------|---|----|-----|-----|----|-------|-------|-------|-----|------|-----|-------|-------|-------|-------|
| Huang et al. (2017a) | M | U  | 300 | SUB | NA | 101.1 | 457.2 | 595.0 | 7.6 | 13.6 | 1.1 | 36.06 | 66.54 | 12.37 | 26.04 |
| Huang et al. (2017a) | M | U  | 300 | SUB | NA | 101.1 | 457.2 | 595.0 | 7.6 | 13.6 | 1.1 | 35.99 | 59.14 | 11.34 | 24.64 |
| Huang et al. (2017a) | M | OA | 300 | SUB | NA | 101.1 | 457.2 | 595.0 | 7.6 | 13.6 | 1.1 | 35.70 | 57.86 | 10.57 | 23.54 |

### Zhang, Han, Li, Huang, Zhu, Su and Ju [27]

|                           |   |   |     |     |    |       |       |       |     |      |     |       |       |       |       |
|---------------------------|---|---|-----|-----|----|-------|-------|-------|-----|------|-----|-------|-------|-------|-------|
| Zhang et al. (2015a)      | M | U | 90  | SUR | NA | 99.7  | 884.6 | 284.0 | 7.8 | 11.2 | 0.7 | 6.49  | 30.17 | 20.11 | 48.47 |
| Zhang et al. (2015a)      | M | U | 60  | SUR | NA | 99.7  | 884.6 | 284.0 | 7.8 | 11.2 | 0.7 | 2.01  | 29.06 | 23.36 | 59.76 |
| Zhang, <i>et al.</i> [66] | M | U | 79  | SUR | NA | 102.7 | 324.2 | 104.0 | 7.9 | 35.5 | 1.2 | 11.78 | 38.89 | 11.20 | 55.23 |
| Zhang et al. (2015b)      | M | U | 147 | SUR | NA | 102.7 | 324.2 | 104.0 | 7.9 | 35.5 | 1.2 | 18.72 | 52.31 | 15.94 | 40.56 |
| Zhang et al. (2015b)      | M | U | 215 | SUR | NA | 102.7 | 324.2 | 104.0 | 7.9 | 35.5 | 1.2 | 26.01 | 63.31 | 13.60 | 30.65 |
| Zhang et al. (2015b)      | M | U | 375 | SUR | NA | 102.7 | 324.2 | 104.0 | 7.9 | 35.5 | 1.2 | 42.51 | 50.75 | 9.44  | 19.26 |
| Zhang et al. (2015b)      | M | U | 79  | SUB | NA | 103.4 | 537.2 | 104.0 | 7.9 | 35.5 | 1.2 | 10.43 | 28.26 | 8.95  | 49.43 |
| Zhang et al. (2015b)      | M | U | 147 | SUB | NA | 103.4 | 537.2 | 104.0 | 7.9 | 35.5 | 1.2 | 18.10 | 43.34 | 13.92 | 37.43 |
| Zhang et al. (2015b)      | M | U | 215 | SUB | NA | 103.4 | 537.2 | 104.0 | 7.9 | 35.5 | 1.2 | 25.73 | 56.82 | 12.57 | 29.21 |
| Zhang et al. (2015b)      | M | U | 375 | SUB | NA | 103.4 | 537.2 | 104.0 | 7.9 | 35.5 | 1.2 | 43.71 | 46.37 | 8.72  | 18.49 |

### Pacholski, Cai, Nieder, Richter, Fan, Zhu and Roelcke [33]

|                         |   |   |     |     |    |       |       |       |     |     |     |       |       |       |       |
|-------------------------|---|---|-----|-----|----|-------|-------|-------|-----|-----|-----|-------|-------|-------|-------|
| Pacholski et al. (2006) | M | U | 75  | SUR | NA | 103.4 | 526.7 | 104.0 | 8.6 | 9.3 | 0.6 | 13.71 | 37.62 | 12.44 | 63.19 |
| Pacholski et al. (2006) | M | U | 75  | SUR | NA | 103.4 | 526.7 | 104.0 | 8.6 | 9.3 | 0.6 | 14.19 | 29.40 | 11.26 | 62.59 |
| Pacholski et al. (2006) | M | U | 200 | SUR | NA | 103.4 | 526.7 | 104.0 | 8.6 | 9.3 | 0.6 | 24.38 | 66.80 | 15.50 | 33.50 |
| Pacholski et al. (2006) | M | U | 200 | SUB | NA | 103.4 | 526.7 | 104.0 | 8.6 | 9.3 | 0.6 | 24.93 | 73.80 | 16.48 | 35.05 |
| Pacholski et al. (2006) | M | U | 150 | SUR | NA | 82.8  | 68.1  | 104.0 | 8.6 | 9.3 | 0.6 | 30.12 | 55.46 | 9.31  | 29.05 |
| Pacholski et al. (2006) | M | U | 150 | SUB | NA | 82.8  | 68.1  | 104.0 | 8.6 | 9.3 | 0.6 | 29.87 | 64.11 | 10.81 | 31.12 |

**Huang, Zhang,  
Zhu, Xin, Zhang,  
Ma, Yang, Mirza  
and Wu [34]**

|                                |   |   |     |     |    |       |       |       |     |      |     |       |       |       |       |
|--------------------------------|---|---|-----|-----|----|-------|-------|-------|-----|------|-----|-------|-------|-------|-------|
| <b>Huang et al. (2015)</b>     | M | U | 150 | SUB | NA | 100.0 | 426.7 | 137.0 | 8.3 | 10.2 | 0.6 | 17.88 | 45.91 | 14.74 | 39.68 |
| <b>Huang et al. (2015)</b>     | M | U | 150 | SUB | NA | 100.0 | 426.7 | 137.0 | 8.3 | 10.2 | 0.6 | 18.86 | 55.50 | 16.79 | 43.30 |
| <b>Huang et al. (2015)</b>     | M | U | 150 | SUB | NA | 100.0 | 426.7 | 137.0 | 8.3 | 10.2 | 0.6 | 18.82 | 53.07 | 15.82 | 41.92 |
| <b>Huang et al. (2015)</b>     | M | U | 190 | SUB | NA | 100.0 | 426.7 | 137.0 | 8.3 | 10.2 | 0.6 | 22.75 | 63.42 | 16.81 | 38.21 |
| <b>Huang et al. (2015)</b>     | M | U | 190 | SUB | NA | 100.0 | 426.7 | 137.0 | 8.3 | 10.2 | 0.6 | 22.13 | 57.50 | 14.85 | 35.23 |
| <b>Huang et al. (2015)</b>     | M | U | 190 | SUB | NA | 100.0 | 426.7 | 137.0 | 8.3 | 10.2 | 0.6 | 21.22 | 50.43 | 13.69 | 33.21 |
| <b>Huang et al. (2015)</b>     | M | U | 190 | SUB | NA | 100.0 | 426.7 | 137.0 | 8.3 | 10.2 | 0.6 | 21.17 | 48.16 | 12.86 | 32.08 |
| <b>Huang et al. (2015)</b>     | M | U | 230 | SUB | NA | 100.0 | 426.7 | 137.0 | 8.3 | 10.2 | 0.6 | 25.53 | 62.43 | 14.42 | 31.39 |
| <b>Huang et al. (2015)</b>     | M | U | 230 | SUB | NA | 100.0 | 426.7 | 137.0 | 8.3 | 10.2 | 0.6 | 26.30 | 68.17 | 15.06 | 32.55 |
| <b>Huang et al. (2015)</b>     | M | U | 230 | SUB | NA | 100.0 | 426.7 | 137.0 | 8.3 | 10.2 | 0.6 | 22.80 | 52.97 | 12.74 | 28.22 |
| <b>Huang et al. (2015)</b>     | M | U | 270 | SUB | NA | 100.0 | 426.7 | 137.0 | 8.3 | 10.2 | 0.6 | 28.56 | 68.47 | 12.99 | 27.22 |
| <b>Huang et al. (2015)</b>     | M | U | 270 | SUB | NA | 100.0 | 426.7 | 137.0 | 8.3 | 10.2 | 0.6 | 28.51 | 69.44 | 13.25 | 27.54 |
| <b>Huang et al. (2015)</b>     | M | U | 270 | SUB | NA | 100.0 | 426.7 | 137.0 | 8.3 | 10.2 | 0.6 | 28.53 | 74.82 | 13.91 | 28.40 |
| <b>Li, <i>et al.</i> [67]</b>  | R | U | 75  | SUR | NA | 83.8  | 379.2 | 360.0 | 7.9 | 19.2 | 2.4 | 8.48  | 8.98  | 6.61  | 67.08 |
| <b>Li et al. (2017)</b>        | R | U | 150 | SUR | NA | 83.8  | 379.2 | 360.0 | 7.9 | 19.2 | 2.4 | 17.69 | 11.62 | 7.57  | 37.77 |
| <b>Li et al. (2017)</b>        | R | U | 225 | SUR | NA | 83.8  | 379.2 | 360.0 | 7.9 | 19.2 | 2.4 | 22.83 | 19.49 | 12.23 | 32.96 |
| <b>Li et al. (2017)</b>        | R | U | 300 | SUR | NA | 83.8  | 379.2 | 360.0 | 7.9 | 19.2 | 2.4 | 26.77 | 26.59 | 13.01 | 28.49 |
| <b>Li et al. (2017)</b>        | R | U | 75  | SUR | NA | 84.8  | 229.4 | 360.0 | 7.9 | 19.2 | 2.4 | 7.85  | 12.39 | 4.57  | 57.40 |
| <b>Li et al. (2017)</b>        | R | U | 150 | SUR | NA | 84.8  | 229.4 | 360.0 | 7.9 | 19.2 | 2.4 | 18.80 | 14.81 | 5.18  | 34.43 |
| <b>Li et al. (2017)</b>        | R | U | 225 | SUR | NA | 84.8  | 229.4 | 360.0 | 7.9 | 19.2 | 2.4 | 23.12 | 11.83 | 9.17  | 28.71 |
| <b>Li et al. (2017)</b>        | R | U | 300 | SUR | NA | 84.8  | 229.4 | 360.0 | 7.9 | 19.2 | 2.4 | 28.10 | 19.65 | 10.76 | 25.92 |
| <b>Han, <i>et al.</i> [68]</b> | R | U | 75  | SUR | NA | 88.6  | 323.5 | 306.0 | 7.2 | 15.6 | 1.2 | 8.96  | 15.69 | 13.15 | 70.10 |
| <b>Han et al. (2003)</b>       | R | U | 75  | SUR | NA | 84.9  | 304.3 | 306.0 | 7.2 | 15.6 | 1.2 | 9.93  | 8.37  | 17.11 | 79.82 |
| <b>Han et al. (2003)</b>       | R | U | 75  | SUR | NA | 84.9  | 304.3 | 306.0 | 7.2 | 15.6 | 1.2 | 9.71  | 21.36 | 15.06 | 75.78 |
| <b>Han et al. (2003)</b>       | R | U | 150 | SUR | NA | 88.6  | 323.5 | 306.0 | 7.2 | 15.6 | 1.2 | 18.41 | 18.55 | 12.01 | 43.47 |

|                            |   |    |     |     |    |       |       |       |     |      |     |       |       |       |       |
|----------------------------|---|----|-----|-----|----|-------|-------|-------|-----|------|-----|-------|-------|-------|-------|
| <b>Han et al. (2003)</b>   | R | U  | 150 | SUR | NA | 88.6  | 323.5 | 306.0 | 7.2 | 15.6 | 1.2 | 17.79 | 27.13 | 16.65 | 49.53 |
| <b>Han et al. (2003)</b>   | R | U  | 150 | SUR | NA | 84.9  | 304.3 | 306.0 | 7.2 | 15.6 | 1.2 | 17.96 | 19.60 | 14.76 | 47.00 |
| <b>Sun, et al. [69]</b>    | R | U  | 150 | SUB | NA | 88.7  | 623.5 | 300.0 | 6.8 | 11.4 | 0.7 | 17.79 | 5.11  | 10.94 | 44.51 |
| <b>Sun et al. (2019c)</b>  | R | U  | 150 | SUB | NA | 88.7  | 623.5 | 300.0 | 6.8 | 11.4 | 0.7 | 18.02 | 5.81  | 12.42 | 47.03 |
| <b>Sun et al. (2019c)</b>  | R | U  | 150 | SUB | NA | 88.7  | 623.5 | 300.0 | 6.8 | 11.4 | 0.7 | 18.02 | 0.16  | 13.53 | 48.71 |
| <b>Sun et al. (2019c)</b>  | R | U  | 150 | SUB | NA | 88.7  | 623.5 | 300.0 | 6.8 | 11.4 | 0.7 | 17.86 | 0.65  | 11.35 | 45.21 |
| <b>Sun et al. (2019c)</b>  | R | U  | 150 | SUB | NA | 88.7  | 623.5 | 300.0 | 6.8 | 11.4 | 0.7 | 17.98 | 5.97  | 12.64 | 47.31 |
| <b>Sun et al. (2019c)</b>  | R | U  | 150 | SUB | NA | 88.7  | 623.5 | 300.0 | 6.8 | 11.4 | 0.7 | 18.02 | 0.23  | 13.85 | 49.19 |
| <b>Sun et al. (2019c)</b>  | R | U  | 150 | SUB | NA | 88.8  | 619.7 | 300.0 | 6.8 | 11.4 | 0.7 | 17.74 | 5.48  | 11.44 | 45.19 |
| <b>Sun et al. (2019c)</b>  | R | U  | 150 | SUB | NA | 88.8  | 619.7 | 300.0 | 6.8 | 11.4 | 0.7 | 17.97 | 6.35  | 13.10 | 47.98 |
| <b>Sun et al. (2019c)</b>  | R | U  | 150 | SUB | NA | 88.8  | 619.7 | 300.0 | 6.8 | 11.4 | 0.7 | 17.83 | 0.19  | 14.45 | 49.82 |
| <b>Sun et al. (2019c)</b>  | R | U  | 150 | SUB | NA | 88.8  | 619.7 | 300.0 | 6.8 | 11.4 | 0.7 | 17.92 | 5.44  | 11.45 | 45.43 |
| <b>Sun et al. (2019c)</b>  | R | U  | 150 | SUB | NA | 88.8  | 619.7 | 300.0 | 6.8 | 11.4 | 0.7 | 17.99 | 6.42  | 12.95 | 47.80 |
| <b>Sun et al. (2019c)</b>  | R | U  | 150 | SUB | NA | 88.8  | 619.7 | 300.0 | 6.8 | 11.4 | 0.7 | 17.89 | 8.57  | 14.66 | 50.22 |
| <b>Sun, et al. [70]</b>    | R | U  | 180 | SUR | NA | 90.2  | 459.5 | 176.0 | 7.8 | 13.7 | 1.2 | 20.76 | 18.50 | 17.72 | 43.97 |
| <b>Sun et al. (2016b)</b>  | R | U  | 180 | SUR | IA | 86.5  | 488.5 | 176.0 | 7.8 | 13.7 | 1.2 | 19.23 | 26.99 | 22.16 | 48.76 |
| <b>Sun et al. (2016b)</b>  | R | U  | 180 | SUR | IA | 84.2  | 320.8 | 176.0 | 7.8 | 13.7 | 1.2 | 19.29 | 26.92 | 22.08 | 48.70 |
| <b>Sun et al. (2016b)</b>  | R | U  | 180 | SUR | IA | 87.9  | 597.5 | 176.0 | 7.8 | 13.7 | 1.2 | 19.41 | 26.23 | 21.36 | 47.83 |
| <b>Sun et al. (2016b)</b>  | R | U  | 180 | SUR | IA | 87.1  | 322.7 | 176.0 | 7.8 | 13.7 | 1.2 | 19.85 | 24.14 | 19.16 | 45.20 |
| <b>Sun et al. (2016b)</b>  | R | U  | 180 | SUR | IA | 87.1  | 505.7 | 176.0 | 7.8 | 13.7 | 1.2 | 19.14 | 27.34 | 22.54 | 49.19 |
| <b>Sun et al. (2016b)</b>  | R | U  | 180 | SUR | IA | 89.5  | 550.7 | 176.0 | 7.8 | 13.7 | 1.2 | 18.65 | 29.14 | 24.47 | 51.34 |
| <b>Sun et al. (2016b)</b>  | R | IU | 180 | SUR | NA | 88.0  | 198.1 | 176.0 | 7.8 | 13.7 | 1.2 | 18.81 | 28.75 | 24.03 | 50.90 |
| <b>Sun et al. (2016b)</b>  | R | IU | 180 | SUR | NA | 88.9  | 271.8 | 176.0 | 7.8 | 13.7 | 1.2 | 18.43 | 29.74 | 23.60 | 52.02 |
| <b>Wang, et al. [71]</b>   | R | U  | 160 | SUR | NA | 95.3  | 429.2 | 311.0 | 7.3 | 13.8 | 1.6 | 19.20 | 31.33 | 15.99 | 46.89 |
| <b>Wang et al. (2018a)</b> | R | U  | 160 | SUR | NA | 95.3  | 429.2 | 311.0 | 7.3 | 13.8 | 1.6 | 18.84 | 32.56 | 17.36 | 48.48 |
| <b>Wang et al. (2018a)</b> | R | U  | 160 | SUR | NA | 95.3  | 429.2 | 311.0 | 7.3 | 13.8 | 1.6 | 15.88 | 19.48 | 9.74  | 35.06 |
| <b>Wang et al. (2018a)</b> | R | U  | 160 | SUR | NA | 95.3  | 429.2 | 311.0 | 7.3 | 13.8 | 1.6 | 16.23 | 20.28 | 10.50 | 36.36 |
| <b>Wang, et al. [72]</b>   | R | U  | 160 | SUR | NA | 109.4 | 397.5 | 371.0 | 5.4 | 18.1 | 1.2 | 23.77 | 22.79 | 13.45 | 36.13 |

|                           |   |    |     |     |    |       |        |       |     |      |     |       |       |       |       |
|---------------------------|---|----|-----|-----|----|-------|--------|-------|-----|------|-----|-------|-------|-------|-------|
| Wang et al. (2019)        | R | U  | 160 | SUR | MA | 109.4 | 397.5  | 371.0 | 5.4 | 18.1 | 1.2 | 21.90 | 35.42 | 16.62 | 39.33 |
| Liang, <i>et al.</i> [73] | R | U  | 135 | SUB | NA | 77.8  | 708.1  | 530.0 | 7.5 | 80.0 | 4.5 | 17.54 | 22.21 | 8.32  | 41.08 |
| Liang et al. (2017)       | R | U  | 180 | SUB | NA | 77.8  | 708.1  | 530.0 | 7.5 | 80.0 | 4.5 | 21.04 | 22.35 | 9.57  | 34.06 |
| Liang et al. (2017)       | R | U  | 225 | SUB | NA | 77.8  | 708.1  | 530.0 | 7.5 | 80.0 | 4.5 | 21.99 | 28.54 | 12.90 | 32.45 |
| Liang et al. (2017)       | R | U  | 270 | SUB | NA | 77.8  | 708.1  | 530.0 | 7.5 | 80.0 | 4.5 | 24.43 | 28.38 | 12.57 | 28.74 |
| Liang et al. (2017)       | R | U  | 380 | SUB | NA | 77.8  | 708.1  | 530.0 | 7.5 | 80.0 | 4.5 | 30.75 | 25.19 | 11.41 | 22.91 |
| Shi, <i>et al.</i> [74]   | R | U  | 180 | SUR | NA | 77.8  | 708.1  | 149.0 | 7.5 | 80.0 | 4.5 | 23.37 | 27.55 | 10.80 | 36.27 |
| Shi et al. (2014)         | R | U  | 90  | SUR | NA | 77.8  | 708.1  | 149.0 | 7.5 | 80.0 | 4.5 | 12.39 | 16.24 | 5.53  | 50.43 |
| Shi et al. (2014)         | R | U  | 180 | SUR | NA | 77.8  | 708.1  | 149.0 | 7.5 | 80.0 | 4.5 | 21.98 | 21.46 | 9.05  | 32.76 |
| Shi et al. (2014)         | R | U  | 270 | SUR | NA | 77.8  | 708.1  | 149.0 | 7.5 | 80.0 | 4.5 | 25.89 | 29.10 | 13.23 | 29.40 |
| Shi et al. (2014)         | R | U  | 360 | SUR | NA | 77.8  | 708.1  | 149.0 | 7.5 | 80.0 | 4.5 | 31.79 | 25.34 | 11.17 | 23.11 |
| Xue, <i>et al.</i> [75]   | R | U  | 185 | SUR | NA | 82.9  | 1026.9 | 106.0 | 5.0 | 26.5 | 1.4 | 20.14 | 20.25 | 8.59  | 30.74 |
| Xue et al. (2018)         | R | OA | 185 | SUR | NA | 82.9  | 1026.9 | 106.0 | 5.0 | 26.5 | 1.4 | 23.74 | 19.95 | 7.07  | 30.73 |
| Xue et al. (2018)         | R | OA | 185 | SUR | NA | 82.9  | 1026.9 | 106.0 | 5.0 | 26.5 | 1.4 | 23.79 | 24.31 | 8.09  | 32.27 |
| Xue et al. (2018)         | R | OA | 185 | SUR | NA | 82.9  | 1026.9 | 106.0 | 5.0 | 26.5 | 1.4 | 24.53 | 17.44 | 4.53  | 27.41 |
| Ahmed, <i>et al.</i> [76] | R | U  | 180 | SUB | NA | 106.1 | 1391.4 | 333.0 | 6.0 | 41.3 | 1.6 | 22.61 | 15.06 | 7.43  | 38.35 |
| Ahmed et al. (2018)       | R | U  | 150 | SUB | NA | 106.1 | 1391.4 | 333.0 | 6.0 | 41.3 | 1.6 | 15.29 | 10.64 | 5.58  | 36.76 |
| Ahmed et al. (2018)       | R | U  | 150 | SUB | NA | 106.1 | 1391.4 | 333.0 | 6.0 | 41.3 | 1.6 | 16.34 | 10.48 | 6.27  | 38.94 |
| Ahmed et al. (2018)       | R | U  | 210 | SUB | NA | 106.1 | 1391.4 | 333.0 | 6.0 | 41.3 | 1.6 | 26.15 | 15.81 | 7.01  | 28.16 |
| Ahmed et al. (2018)       | R | U  | 180 | SUB | NA | 106.1 | 1391.4 | 333.0 | 6.0 | 41.3 | 1.6 | 19.77 | 10.39 | 7.93  | 30.89 |
| Ahmed et al. (2018)       | R | U  | 180 | SUB | NA | 106.1 | 1391.4 | 333.0 | 6.0 | 41.3 | 1.6 | 25.18 | 10.80 | 4.26  | 28.90 |
| Yang, <i>et al.</i> [77]  | R | U  | 100 | SUR | NA | 96.9  | 606.5  | 140.0 | 7.3 | 8.2  | 0.5 | 12.76 | 38.30 | 9.98  | 62.13 |
| Yang et al. (2013)        | R | U  | 200 | SUR | NA | 96.9  | 606.5  | 140.0 | 7.3 | 8.2  | 0.5 | 21.12 | 49.93 | 9.01  | 33.79 |
| Yang et al. (2013)        | R | U  | 300 | SUR | NA | 96.9  | 606.5  | 140.0 | 7.3 | 8.2  | 0.5 | 29.13 | 41.05 | 6.83  | 22.86 |
| Yang et al. (2013)        | R | IU | 100 | SUR | NA | 96.9  | 606.5  | 140.0 | 7.3 | 8.2  | 0.5 | 13.92 | 56.45 | 11.40 | 68.90 |
| Yang et al. (2013)        | R | IU | 200 | SUR | NA | 96.9  | 606.5  | 140.0 | 7.3 | 8.2  | 0.5 | 24.28 | 62.73 | 11.09 | 39.57 |
| Yang et al. (2013)        | R | IU | 300 | SUR | NA | 96.9  | 606.5  | 140.0 | 7.3 | 8.2  | 0.5 | 34.50 | 52.99 | 8.88  | 27.77 |
| Yang et al. (2013)        | R | U  | 100 | SUB | NA | 98.2  | 341.5  | 140.0 | 7.3 | 8.2  | 0.5 | 13.20 | 30.13 | 8.74  | 59.41 |

|                         |   |     |     |     |    |       |       |       |     |      |     |       |       |       |       |
|-------------------------|---|-----|-----|-----|----|-------|-------|-------|-----|------|-----|-------|-------|-------|-------|
| Yang et al. (2013)      | R | U   | 200 | SUB | NA | 98.2  | 341.5 | 140.0 | 7.3 | 8.2  | 0.5 | 20.84 | 44.21 | 8.55  | 32.14 |
| Yang et al. (2013)      | R | U   | 300 | SUB | NA | 98.2  | 341.5 | 140.0 | 7.3 | 8.2  | 0.5 | 28.51 | 36.55 | 6.40  | 21.59 |
| Yang et al. (2013)      | R | IU  | 100 | SUR | NA | 98.2  | 341.5 | 140.0 | 7.3 | 8.2  | 0.5 | 13.54 | 52.01 | 14.67 | 69.98 |
| Yang et al. (2013)      | R | IU  | 200 | SUR | NA | 98.2  | 341.5 | 140.0 | 7.3 | 8.2  | 0.5 | 24.18 | 59.93 | 12.21 | 39.99 |
| Yang et al. (2013)      | R | IU  | 300 | SUR | NA | 98.2  | 341.5 | 140.0 | 7.3 | 8.2  | 0.5 | 34.70 | 49.97 | 9.16  | 27.54 |
| Liu, <i>et al.</i> [78] | R | U   | 180 | SUR | NA | 101.4 | 521.4 | 108.0 | 5.2 | 20.2 | 1.6 | 15.98 | 36.65 | 8.98  | 31.94 |
| Liu et al. (2015)       | R | OCF | 180 | SUB | NA | 101.4 | 521.4 | 108.0 | 5.2 | 20.2 | 1.6 | 16.94 | 44.22 | 10.71 | 34.90 |
| Liu et al. (2015)       | R | OCF | 180 | SUB | NA | 101.4 | 521.4 | 108.0 | 5.2 | 20.2 | 1.6 | 17.38 | 52.01 | 12.42 | 37.54 |
| Liu et al. (2015)       | R | OCF | 180 | SUB | NA | 101.4 | 521.4 | 108.0 | 5.2 | 20.2 | 1.6 | 17.49 | 56.54 | 14.34 | 40.24 |
| Liu et al. (2015)       | R | OCF | 180 | SUR | NA | 101.8 | 418.8 | 108.0 | 5.2 | 20.2 | 1.6 | 15.46 | 35.23 | 8.42  | 30.88 |
| Liu et al. (2015)       | R | OCF | 180 | SUB | NA | 101.8 | 418.8 | 108.0 | 5.2 | 20.2 | 1.6 | 16.26 | 41.69 | 9.76  | 33.16 |
| Liu et al. (2015)       | R | OCF | 180 | SUB | NA | 101.8 | 418.8 | 108.0 | 5.2 | 20.2 | 1.6 | 16.95 | 44.57 | 10.87 | 35.12 |
| Liu et al. (2015)       | R | OCF | 180 | SUB | NA | 101.8 | 418.8 | 108.0 | 5.2 | 20.2 | 1.6 | 17.20 | 53.09 | 12.96 | 38.13 |
| Li, <i>et al.</i> [79]  | R | U   | 165 | SUR | NA | 87.4  | 386.1 | 95.0  | 4.9 | 32.9 | 1.4 | 20.31 | 44.84 | 11.63 | 43.08 |
| Li et al. (2018a)       | R | U   | 165 | SUR | NA | 87.4  | 386.1 | 95.0  | 4.9 | 32.9 | 1.4 | 20.50 | 48.15 | 11.09 | 42.46 |
| Li et al. (2018a)       | R | IU  | 165 | SUR | NA | 87.4  | 386.1 | 95.0  | 4.9 | 32.9 | 1.4 | 19.67 | 55.92 | 15.07 | 47.52 |
| Li et al. (2018a)       | R | IU  | 165 | SUR | NA | 87.4  | 386.1 | 95.0  | 4.9 | 32.9 | 1.4 | 19.50 | 61.93 | 15.70 | 48.26 |
| Li et al. (2018a)       | R | IU  | 165 | SUR | NA | 87.4  | 386.1 | 95.0  | 4.9 | 32.9 | 1.4 | 19.76 | 53.81 | 14.04 | 46.10 |
| Li et al. (2018a)       | R | U   | 165 | SUR | NA | 90.2  | 300.8 | 95.0  | 4.9 | 32.9 | 1.4 | 20.73 | 42.15 | 9.31  | 41.60 |
| Li et al. (2018a)       | R | U   | 165 | SUR | NA | 90.2  | 300.8 | 95.0  | 4.9 | 32.9 | 1.4 | 21.10 | 45.62 | 8.83  | 41.25 |
| Li et al. (2018a)       | R | IU  | 165 | SUR | NA | 90.2  | 300.8 | 95.0  | 4.9 | 32.9 | 1.4 | 19.63 | 55.96 | 14.24 | 47.87 |
| Li et al. (2018a)       | R | IU  | 165 | SUR | NA | 90.2  | 300.8 | 95.0  | 4.9 | 32.9 | 1.4 | 20.65 | 58.00 | 12.51 | 46.49 |
| Li et al. (2018a)       | R | IU  | 165 | SUR | NA | 90.2  | 300.8 | 95.0  | 4.9 | 32.9 | 1.4 | 20.66 | 49.44 | 10.75 | 43.76 |
| Guo, <i>et al.</i> [80] | R | U   | 195 | SUB | NA | 92.6  | 441.5 | 125.0 | 6.4 | 43.6 | 1.4 | 20.40 | 58.28 | 15.07 | 40.22 |
| Guo et al. (2019)       | R | IU  | 195 | SUR | NA | 92.6  | 441.5 | 125.0 | 6.4 | 43.6 | 1.4 | 21.32 | 74.53 | 17.74 | 44.74 |
| Guo et al. (2019)       | R | IU  | 195 | SUR | NA | 92.6  | 441.5 | 125.0 | 6.4 | 43.6 | 1.4 | 20.36 | 65.30 | 15.73 | 41.11 |
| Guo et al. (2019)       | R | IU  | 195 | SUB | NA | 92.6  | 441.5 | 125.0 | 6.4 | 43.6 | 1.4 | 20.51 | 64.74 | 15.45 | 40.84 |
| Guo et al. (2019)       | R | U   | 195 | SUB | NA | 68.4  | 399.7 | 125.0 | 6.4 | 43.6 | 1.4 | 21.07 | 53.67 | 12.91 | 37.69 |

|                         |   |     |     |     |    |       |       |       |     |      |     |       |       |       |        |
|-------------------------|---|-----|-----|-----|----|-------|-------|-------|-----|------|-----|-------|-------|-------|--------|
| Guo et al. (2019)       | R | IU  | 195 | SUR | NA | 68.4  | 399.7 | 125.0 | 6.4 | 43.6 | 1.4 | 21.73 | 70.44 | 16.06 | 42.69  |
| Guo et al. (2019)       | R | IU  | 195 | SUR | NA | 68.4  | 399.7 | 125.0 | 6.4 | 43.6 | 1.4 | 19.13 | 59.44 | 13.90 | 37.67  |
| Guo et al. (2019)       | R | IU  | 195 | SUB | NA | 68.4  | 399.7 | 125.0 | 6.4 | 43.6 | 1.4 | 20.59 | 62.71 | 14.63 | 39.76  |
| Guo et al. (2019)       | R | U   | 195 | SUB | NA | 95.6  | 520.8 | 125.0 | 6.4 | 43.6 | 1.4 | 20.86 | 55.81 | 13.87 | 38.89  |
| Guo et al. (2019)       | R | IU  | 195 | SUR | NA | 95.6  | 520.8 | 125.0 | 6.4 | 43.6 | 1.4 | 21.43 | 73.96 | 17.48 | 44.46  |
| Guo et al. (2019)       | R | IU  | 195 | SUR | NA | 95.6  | 520.8 | 125.0 | 6.4 | 43.6 | 1.4 | 21.32 | 58.16 | 12.61 | 37.46  |
| Guo et al. (2019)       | R | IU  | 195 | SUB | NA | 95.6  | 520.8 | 125.0 | 6.4 | 43.6 | 1.4 | 21.45 | 59.56 | 13.09 | 38.24  |
| Guo et al. (2019)       | R | U   | 195 | SUB | NA | 68.2  | 322.9 | 125.0 | 6.4 | 43.6 | 1.4 | 20.90 | 54.48 | 13.30 | 38.12  |
| Guo et al. (2019)       | R | IU  | 195 | SUR | NA | 68.2  | 322.9 | 125.0 | 6.4 | 43.6 | 1.4 | 21.89 | 68.93 | 15.43 | 41.93  |
| Guo et al. (2019)       | R | IU  | 195 | SUR | NA | 68.2  | 322.9 | 125.0 | 6.4 | 43.6 | 1.4 | 19.56 | 58.92 | 13.54 | 37.49  |
| Guo et al. (2019)       | R | IU  | 195 | SUB | NA | 68.2  | 322.9 | 125.0 | 6.4 | 43.6 | 1.4 | 20.11 | 62.51 | 14.74 | 39.54  |
| Liu, <i>et al.</i> [81] | R | OCF | 285 | SUR | NA | 110.2 | 916.6 | 112.0 | 5.2 | 41.5 | 2.4 | 25.38 | 48.21 | 14.21 | 29.53  |
| Liu et al. (2018)       | R | OA  | 180 | SUB | NA | 110.2 | 916.6 | 112.0 | 5.2 | 41.5 | 2.4 | 18.79 | 53.72 | 17.40 | 42.33  |
| Liu et al. (2018)       | R | OA  | 285 | SUR | NA | 110.2 | 916.6 | 112.0 | 5.2 | 41.5 | 2.4 | 24.87 | 55.85 | 16.13 | 31.82  |
| Liu et al. (2018)       | R | UIU | 285 | SUR | NA | 110.2 | 916.6 | 112.0 | 5.2 | 41.5 | 2.4 | 25.29 | 49.96 | 17.73 | 34.03  |
| Liu et al. (2018)       | R | OCF | 285 | SUR | NA | 102.8 | 761.2 | 112.0 | 5.2 | 41.5 | 2.4 | 24.78 | 45.50 | 12.90 | 28.14  |
| Liu et al. (2018)       | R | OA  | 180 | SUB | NA | 102.8 | 761.2 | 112.0 | 5.2 | 41.5 | 2.4 | 17.67 | 48.01 | 14.60 | 38.53  |
| Liu et al. (2018)       | R | OA  | 285 | SUR | NA | 102.8 | 761.2 | 112.0 | 5.2 | 41.5 | 2.4 | 25.18 | 50.76 | 13.78 | 29.41  |
| Liu et al. (2018)       | R | UIU | 285 | SUR | NA | 102.8 | 761.2 | 112.0 | 5.2 | 41.5 | 2.4 | 25.14 | 43.73 | 14.61 | 30.46  |
| Qi, <i>et al.</i> [82]  | R | U   | 50  | SUR | NA | 112.4 | 483.2 | 100.0 | 6.5 | 27.9 | 2.0 | 7.78  | 52.04 | 13.54 | 101.08 |
| Qi et al. (2012)        | R | U   | 100 | SUR | NA | 112.4 | 483.2 | 100.0 | 6.5 | 27.9 | 2.0 | 13.61 | 58.46 | 11.78 | 54.10  |
| Qi et al. (2012)        | R | U   | 50  | SUR | IA | 108.7 | 378.4 | 100.0 | 6.5 | 27.9 | 2.0 | 7.83  | 55.09 | 24.42 | 119.16 |
| Qi et al. (2012)        | R | U   | 100 | SUR | IA | 108.7 | 378.4 | 100.0 | 6.5 | 27.9 | 2.0 | 14.46 | 66.65 | 16.90 | 63.75  |
| Qi et al. (2012)        | R | OCF | 50  | SUR | NA | 112.4 | 483.2 | 100.0 | 6.5 | 27.9 | 2.0 | 8.85  | 52.85 | 12.91 | 109.28 |
| Qi et al. (2012)        | R | OCF | 100 | SUR | NA | 108.7 | 378.4 | 100.0 | 6.5 | 27.9 | 2.0 | 16.19 | 59.71 | 11.29 | 58.92  |
| Li, <i>et al.</i> [83]  | R | U   | 180 | SUB | NA | 102.2 | 432.2 | 314.0 | 5.2 | 42.3 | 2.4 | 14.20 | 56.18 | 16.24 | 49.21  |
| Li et al. (2018b)       | R | IU  | 180 | SUB | NA | 102.2 | 432.2 | 314.0 | 5.2 | 42.3 | 2.4 | 16.73 | 59.99 | 12.16 | 46.74  |
| Li et al. (2018b)       | R | OA  | 180 | SUB | NA | 102.2 | 432.2 | 314.0 | 5.2 | 42.3 | 2.4 | 12.73 | 71.26 | 21.89 | 54.85  |

|                    |   |     |     |     |    |       |       |       |      |      |     |       |       |       |       |
|--------------------|---|-----|-----|-----|----|-------|-------|-------|------|------|-----|-------|-------|-------|-------|
| Li et al. (2018b)  | R | U   | 180 | SUB | NA | 102.2 | 432.2 | 314.0 | 5.2  | 42.3 | 2.4 | 12.85 | 72.18 | 16.24 | 58.23 |
| Li et al. (2018b)  | R | IU  | 180 | SUB | NA | 102.2 | 432.2 | 314.0 | 5.2  | 42.3 | 2.4 | 15.22 | 76.87 | 10.85 | 54.96 |
| Li et al. (2018b)  | R | OA  | 180 | SUB | NA | 102.2 | 432.2 | 314.0 | 5.2  | 42.3 | 2.4 | 14.50 | 69.83 | 10.94 | 53.64 |
| Zhu, et al. [84]   | R | OCF | 150 | SUB | NA | 108.0 | 577.0 | 176.0 | 5.2  | 44.2 | 2.4 | 15.66 | 50.18 | 19.19 | 56.06 |
| Zhu et al. (2017)  | R | OCF | 150 | SUB | NA | 108.0 | 577.0 | 176.0 | 5.2  | 44.2 | 2.4 | 15.82 | 47.33 | 17.49 | 53.85 |
| Zhu et al. (2017)  | R | OCF | 150 | SUB | NA | 108.0 | 577.0 | 176.0 | 5.2  | 44.2 | 2.4 | 15.74 | 44.80 | 16.10 | 51.70 |
| Zhu et al. (2017)  | R | OCF | 150 | SUB | NA | 108.0 | 577.0 | 176.0 | 5.2  | 44.2 | 2.4 | 15.71 | 42.20 | 14.63 | 49.55 |
| Zhu et al. (2017)  | R | OCF | 150 | SUB | NA | 108.0 | 577.0 | 176.0 | 5.2  | 44.2 | 2.4 | 15.84 | 43.14 | 15.11 | 50.42 |
| Zhu et al. (2017)  | R | OCF | 150 | SUB | NA | 108.0 | 577.0 | 176.0 | 5.2  | 44.2 | 2.4 | 15.70 | 42.83 | 15.00 | 50.05 |
| Zhu et al. (2017)  | R | OCF | 150 | SUB | NA | 108.0 | 577.0 | 176.0 | 5.2  | 44.2 | 2.4 | 15.22 | 39.25 | 13.17 | 46.78 |
| Zhu et al. (2017)  | R | OCF | 150 | SUB | NA | 108.0 | 577.0 | 176.0 | 5.2  | 44.2 | 2.4 | 14.46 | 32.35 | 12.07 | 44.26 |
| Zhu et al. (2017)  | R | OCF | 150 | SUB | NA | 103.3 | 598.7 | 176.0 | 5.2  | 44.2 | 2.4 | 13.47 | 29.55 | 10.64 | 41.16 |
| Zhu et al. (2017)  | R | OCF | 150 | SUB | NA | 103.3 | 598.7 | 176.0 | 5.2  | 44.2 | 2.4 | 13.40 | 27.71 | 9.49  | 39.53 |
| Zhu et al. (2017)  | R | OCF | 150 | SUB | NA | 103.3 | 598.7 | 176.0 | 5.2  | 44.2 | 2.4 | 13.18 | 27.38 | 9.35  | 39.11 |
| Zhu et al. (2017)  | R | OCF | 150 | SUB | NA | 103.3 | 598.7 | 176.0 | 5.2  | 44.2 | 2.4 | 13.52 | 27.82 | 9.53  | 39.70 |
| Zhu et al. (2017)  | R | OCF | 150 | SUB | NA | 103.3 | 598.7 | 176.0 | 5.2  | 44.2 | 2.4 | 13.06 | 26.37 | 8.75  | 38.17 |
| Zhu et al. (2017)  | R | OCF | 150 | SUB | NA | 103.3 | 598.7 | 176.0 | 5.2  | 44.2 | 2.4 | 12.29 | 24.36 | 7.69  | 36.01 |
| Zhu et al. (2017)  | R | OCF | 150 | SUB | NA | 103.3 | 598.7 | 176.0 | 5.2  | 44.2 | 2.4 | 12.49 | 22.07 | 6.16  | 34.17 |
| Zhu et al. (2017)  | R | OCF | 150 | SUB | NA | 103.3 | 598.7 | 176.0 | 5.2  | 44.2 | 2.4 | 7.70  | 17.82 | 4.52  | 28.46 |
| Qiao, et al. [85]  | R | U   | 180 | SUR | NA | 106.3 | 533.5 | 565.0 | 28.3 | 7.2  | 2.1 | 13.38 | 36.88 | 20.65 | 38.83 |
| Qiao et al. (2021) | R | IU  | 180 | SUR | NA | 106.3 | 533.5 | 565.0 | 28.3 | 7.2  | 2.1 | 13.84 | 50.65 | 26.00 | 45.50 |
| Qiao et al. (2021) | R | IU  | 180 | SUR | NA | 106.3 | 533.5 | 565.0 | 28.3 | 7.2  | 2.1 | 14.45 | 47.48 | 24.23 | 43.77 |
| Qiao et al. (2021) | R | U   | 180 | SUR | NA | 106.3 | 533.5 | 565.0 | 28.3 | 7.2  | 2.1 | 10.82 | 29.26 | 18.98 | 36.21 |
| Qiao et al. (2021) | R | IU  | 180 | SUR | NA | 106.3 | 533.5 | 565.0 | 28.3 | 7.2  | 2.1 | 14.61 | 52.34 | 27.48 | 48.66 |
| Qiao et al. (2021) | R | IU  | 180 | SUR | NA | 106.3 | 533.5 | 565.0 | 28.3 | 7.2  | 2.1 | 12.38 | 42.90 | 22.43 | 41.11 |
| Tian, et al. [86]  | R | U   | 180 | SUR | NA | 102.2 | 676.3 | 236.0 | 5.6  | 12.5 | 1.2 | 6.06  | 42.85 | 7.47  | 41.61 |
| Tian et al. (2018) | R | IU  | 180 | SUR | NA | 102.2 | 676.3 | 236.0 | 5.6  | 12.5 | 1.2 | 8.07  | 56.74 | 14.20 | 53.17 |
| Tian et al. (2018) | R | IU  | 162 | SUR | NA | 102.2 | 676.3 | 236.0 | 5.6  | 12.5 | 1.2 | 6.95  | 48.51 | 19.07 | 62.67 |

|                           |   |    |       |     |    |       |       |       |      |      |     |       |       |       |       |
|---------------------------|---|----|-------|-----|----|-------|-------|-------|------|------|-----|-------|-------|-------|-------|
| Tian et al. (2018)        | R | IU | 144   | SUR | NA | 102.2 | 676.3 | 236.0 | 5.6  | 12.5 | 1.2 | 6.49  | 46.70 | 16.80 | 65.68 |
| Tian et al. (2018)        | R | IU | 126   | SUR | NA | 102.2 | 676.3 | 236.0 | 5.6  | 12.5 | 1.2 | 5.82  | 41.81 | 16.93 | 72.97 |
| Xu, <i>et al.</i> [87]    | R | U  | 75    | SUB | NA | 100.1 | 935.1 | 595.0 | 6.8  | 19.8 | 1.4 | 10.20 | 29.02 | 11.99 | 71.96 |
| Xu et al. (2013b)         | R | U  | 150   | SUB | NA | 100.1 | 935.1 | 595.0 | 6.8  | 19.8 | 1.4 | 12.46 | 46.35 | 15.26 | 41.21 |
| Xu et al. (2013b)         | R | IU | 75    | SUB | NA | 100.1 | 935.1 | 595.0 | 6.8  | 19.8 | 1.4 | 10.96 | 47.18 | 19.80 | 87.57 |
| Xu et al. (2013b)         | R | IU | 150   | SUB | NA | 100.1 | 935.1 | 595.0 | 6.8  | 19.8 | 1.4 | 15.43 | 66.96 | 19.66 | 50.04 |
| Xu et al. (2013b)         | R | U  | 75    | SUB | NA | 100.1 | 935.1 | 595.0 | 6.8  | 19.8 | 1.4 | 10.21 | 31.16 | 14.90 | 74.52 |
| Xu et al. (2013b)         | R | U  | 150   | SUB | NA | 100.1 | 935.1 | 595.0 | 6.8  | 19.8 | 1.4 | 13.10 | 51.09 | 18.12 | 44.76 |
| Xu et al. (2013b)         | R | IU | 75    | SUB | NA | 100.1 | 935.1 | 595.0 | 6.8  | 19.8 | 1.4 | 10.26 | 52.97 | 26.69 | 92.77 |
| Xu et al. (2013b)         | R | IU | 150   | SUB | NA | 100.1 | 935.1 | 595.0 | 6.8  | 19.8 | 1.4 | 16.67 | 77.95 | 24.61 | 57.51 |
| Xu et al. (2013b)         | R | U  | 75    | SUB | NA | 98.5  | 524.9 | 595.0 | 6.8  | 19.8 | 1.4 | 9.83  | 24.35 | 7.98  | 64.49 |
| Xu et al. (2013b)         | R | U  | 150   | SUB | NA | 98.5  | 524.9 | 595.0 | 6.8  | 19.8 | 1.4 | 12.52 | 50.82 | 17.80 | 44.49 |
| Xu et al. (2013b)         | R | IU | 75    | SUB | NA | 98.5  | 524.9 | 595.0 | 6.8  | 19.8 | 1.4 | 10.27 | 52.42 | 25.15 | 92.65 |
| Xu et al. (2013b)         | R | IU | 150   | SUB | NA | 98.5  | 524.9 | 595.0 | 6.8  | 19.8 | 1.4 | 16.44 | 71.43 | 21.13 | 53.30 |
| Xu et al. (2013b)         | R | U  | 75    | SUB | NA | 98.5  | 524.9 | 595.0 | 6.8  | 19.8 | 1.4 | 9.92  | 27.98 | 10.63 | 70.33 |
| Xu et al. (2013b)         | R | U  | 150   | SUB | NA | 98.5  | 524.9 | 595.0 | 6.8  | 19.8 | 1.4 | 12.92 | 51.46 | 17.52 | 45.23 |
| Xu et al. (2013b)         | R | IU | 75    | SUB | NA | 98.5  | 524.9 | 595.0 | 6.8  | 19.8 | 1.4 | 10.01 | 53.86 | 25.93 | 94.30 |
| Xu et al. (2013b)         | R | IU | 150   | SUB | NA | 98.5  | 524.9 | 595.0 | 6.8  | 19.8 | 1.4 | 17.02 | 75.84 | 22.23 | 56.56 |
| Huang, <i>et al.</i> [88] | R | U  | 90    | SUB | NA | 108.0 | 577.0 | 584.0 | 5.8  | 27.6 | 1.6 | 10.49 | 24.77 | 11.36 | 58.64 |
| Huang et al. (2017b)      | R | U  | 90    | SUB | BA | 108.0 | 577.0 | 584.0 | 5.8  | 27.6 | 1.6 | 9.28  | 32.93 | 14.36 | 59.91 |
| Huang et al. (2017b)      | R | U  | 90    | SUB | BA | 108.0 | 577.0 | 584.0 | 5.8  | 27.6 | 1.6 | 8.20  | 39.60 | 15.91 | 59.45 |
| Lin, <i>et al.</i> [89]   | R | U  | 112.5 | SUR | NA | 98.5  | 729.5 | 202.0 | 7.9  | 10.6 | 0.6 | 9.16  | 66.13 | 10.84 | 77.24 |
| Lin et al. (2015)         | R | U  | 150   | SUR | NA | 98.5  | 729.5 | 202.0 | 7.9  | 10.6 | 0.6 | 11.56 | 67.25 | 9.45  | 57.70 |
| Lin et al. (2015)         | R | U  | 187.5 | SUR | NA | 98.5  | 729.5 | 202.0 | 7.9  | 10.6 | 0.6 | 15.33 | 66.44 | 6.44  | 45.62 |
| Lin et al. (2015)         | R | U  | 225   | SUR | NA | 98.5  | 729.5 | 202.0 | 7.9  | 10.6 | 0.6 | 18.11 | 59.07 | 5.59  | 37.89 |
| Lin et al. (2015)         | R | U  | 300   | SUR | NA | 98.5  | 729.5 | 202.0 | 7.9  | 10.6 | 0.6 | 23.64 | 46.69 | 4.29  | 28.11 |
| Li, <i>et al.</i> [90]    | R | U  | 180   | SUB | NA | 104.3 | 439.7 | 312.0 | 11.1 | 7.7  | 1.4 | 21.07 | 44.38 | 12.76 | 39.96 |
| Li et al. (2020b)         | R | U  | 144   | SUB | NA | 104.3 | 439.7 | 312.0 | 11.1 | 7.7  | 1.4 | 17.18 | 38.64 | 14.60 | 48.67 |



|                                     |   |    |     |     |    |       |       |       |      |      |     |       |       |       |       |
|-------------------------------------|---|----|-----|-----|----|-------|-------|-------|------|------|-----|-------|-------|-------|-------|
| Li et al. (2020b)                   | R | IU | 180 | SUB | NA | 104.3 | 439.7 | 312.0 | 11.1 | 7.7  | 1.4 | 18.20 | 66.35 | 19.94 | 47.46 |
| Li et al. (2020b)                   | R | IU | 144 | SUB | NA | 104.3 | 439.7 | 312.0 | 11.1 | 7.7  | 1.4 | 14.64 | 52.61 | 20.99 | 54.30 |
| Li, et al. [91]                     | R | U  | 90  | SUB | NA | 107.4 | 345.2 | 417.0 | 7.1  | 23.9 | 2.6 | 12.29 | 50.80 | 10.67 | 70.44 |
| Li et al. (2008)                    | R | U  | 180 | SUB | NA | 107.4 | 345.2 | 417.0 | 7.1  | 23.9 | 2.6 | 20.93 | 56.42 | 10.85 | 39.78 |
| Li et al. (2008)                    | R | U  | 270 | SUB | NA | 107.4 | 345.2 | 417.0 | 7.1  | 23.9 | 2.6 | 28.64 | 52.30 | 10.15 | 29.46 |
| Li et al. (2008)                    | R | U  | 360 | SUB | NA | 107.4 | 345.2 | 417.0 | 7.1  | 23.9 | 2.6 | 30.51 | 49.01 | 10.38 | 23.94 |
| Li et al. (2008)                    | R | U  | 90  | SUB | NA | 107.4 | 345.2 | 417.0 | 7.1  | 23.9 | 2.6 | 12.37 | 33.04 | 6.49  | 68.00 |
| Li et al. (2008)                    | R | U  | 180 | SUB | NA | 107.4 | 345.2 | 417.0 | 7.1  | 23.9 | 2.6 | 21.21 | 45.54 | 8.38  | 38.00 |
| Li et al. (2008)                    | R | U  | 270 | SUB | NA | 107.4 | 345.2 | 417.0 | 7.1  | 23.9 | 2.6 | 29.24 | 43.04 | 7.96  | 27.60 |
| Li et al. (2008)                    | R | U  | 360 | SUB | NA | 107.4 | 345.2 | 417.0 | 7.1  | 23.9 | 2.6 | 31.17 | 41.91 | 8.79  | 22.66 |
| Li et al. (2008)                    | R | U  | 90  | SUB | NA | 107.4 | 345.2 | 417.0 | 7.1  | 23.9 | 2.6 | 12.00 | 65.19 | 17.41 | 73.23 |
| Li et al. (2008)                    | R | U  | 180 | SUB | NA | 107.4 | 345.2 | 417.0 | 7.1  | 23.9 | 2.6 | 20.71 | 65.66 | 14.35 | 41.68 |
| Li et al. (2008)                    | R | U  | 270 | SUB | NA | 107.4 | 345.2 | 417.0 | 7.1  | 23.9 | 2.6 | 27.86 | 59.43 | 12.70 | 30.79 |
| Li et al. (2008)                    | R | U  | 360 | SUB | NA | 107.4 | 345.2 | 417.0 | 7.1  | 23.9 | 2.6 | 30.97 | 54.31 | 11.96 | 24.86 |
| Li et al. (2008)                    | R | U  | 90  | SUB | NA | 112.8 | 460.1 | 417.0 | 7.1  | 23.9 | 2.6 | 12.48 | 48.10 | 9.23  | 67.86 |
| Li et al. (2008)                    | R | U  | 180 | SUB | NA | 112.8 | 460.1 | 417.0 | 7.1  | 23.9 | 2.6 | 20.72 | 55.22 | 10.66 | 38.91 |
| Li et al. (2008)                    | R | U  | 270 | SUB | NA | 112.8 | 460.1 | 417.0 | 7.1  | 23.9 | 2.6 | 28.62 | 51.29 | 9.94  | 28.89 |
| Li et al. (2008)                    | R | U  | 360 | SUB | NA | 112.8 | 460.1 | 417.0 | 7.1  | 23.9 | 2.6 | 31.66 | 49.05 | 10.33 | 23.99 |
| Li et al. (2008)                    | R | U  | 90  | SUB | NA | 112.8 | 460.1 | 417.0 | 7.1  | 23.9 | 2.6 | 12.04 | 44.36 | 16.60 | 73.55 |
| Li et al. (2008)                    | R | U  | 180 | SUB | NA | 112.8 | 460.1 | 417.0 | 7.1  | 23.9 | 2.6 | 20.59 | 55.10 | 14.69 | 42.79 |
| Li et al. (2008)                    | R | U  | 270 | SUB | NA | 112.8 | 460.1 | 417.0 | 7.1  | 23.9 | 2.6 | 28.28 | 51.24 | 12.30 | 30.90 |
| Li et al. (2008)                    | R | U  | 360 | SUB | NA | 112.8 | 460.1 | 417.0 | 7.1  | 23.9 | 2.6 | 31.31 | 49.64 | 12.30 | 25.71 |
| Li et al. (2008)                    | R | U  | 90  | SUB | NA | 112.8 | 460.1 | 417.0 | 7.1  | 23.9 | 2.6 | 10.52 | 75.98 | 24.31 | 80.75 |
| Li et al. (2008)                    | R | U  | 180 | SUB | NA | 112.8 | 460.1 | 417.0 | 7.1  | 23.9 | 2.6 | 20.85 | 64.39 | 13.30 | 41.34 |
| Li et al. (2008)                    | R | U  | 270 | SUB | NA | 112.8 | 460.1 | 417.0 | 7.1  | 23.9 | 2.6 | 28.21 | 56.63 | 11.35 | 29.72 |
| Li et al. (2008)                    | R | U  | 360 | SUB | NA | 112.8 | 460.1 | 417.0 | 7.1  | 23.9 | 2.6 | 31.06 | 54.73 | 11.83 | 25.15 |
| Sun, Wu, Ma , Liu<br>and Xiong [28] | R | U  | 250 | SUB | NA | 107.0 | 728.5 | 205.0 | 5.7  | 25.2 | 2.5 | 22.00 | 58.97 | 14.85 | 33.63 |

|                           |   |     |     |     |    |       |       |       |     |      |     |       |       |       |       |
|---------------------------|---|-----|-----|-----|----|-------|-------|-------|-----|------|-----|-------|-------|-------|-------|
| Sun et al. (2018b)        | R | OA  | 250 | SUB | MA | 107.0 | 728.5 | 205.0 | 5.7 | 25.2 | 2.5 | 21.62 | 60.17 | 14.16 | 32.56 |
| Sun et al. (2018b)        | R | OA  | 250 | SUB | MA | 107.0 | 728.5 | 205.0 | 5.7 | 25.2 | 2.5 | 21.74 | 55.84 | 12.56 | 30.53 |
| <b>Tian, Cai, Cao and</b> |   |     |     |     |    |       |       |       |     |      |     |       |       |       |       |
| <b>Li [29]</b>            | R | OA  | 100 | SUB | NA | 105.0 | 401.0 | 275.0 | 6.3 | 9.9  | 0.7 | 22.90 | 29.44 | 9.31  | 39.16 |
| Tian et al. (2001)        | R | OA  | 200 | SUB | NA | 105.0 | 401.0 | 275.0 | 6.3 | 9.9  | 0.7 | 41.14 | 43.66 | 6.92  | 21.79 |
| Tian et al. (2001)        | R | OA  | 300 | SUB | NA | 105.0 | 401.0 | 275.0 | 6.3 | 9.9  | 0.7 | 52.44 | 58.69 | 7.30  | 17.24 |
| Tian et al. (2001)        | R | U   | 200 | SUB | NA | 105.0 | 401.0 | 275.0 | 6.3 | 9.9  | 0.7 | 35.41 | 50.21 | 10.44 | 25.31 |
| Tian et al. (2001)        | R | OA  | 100 | SUB | NA | 103.5 | 712.7 | 275.0 | 6.3 | 9.9  | 0.7 | 21.04 | 24.34 | 6.91  | 37.40 |
| Tian et al. (2001)        | R | OA  | 200 | SUB | NA | 103.5 | 712.7 | 275.0 | 6.3 | 9.9  | 0.7 | 40.45 | 40.20 | 5.58  | 21.15 |
| Tian et al. (2001)        | R | OA  | 300 | SUB | NA | 103.5 | 712.7 | 275.0 | 6.3 | 9.9  | 0.7 | 51.53 | 52.28 | 5.77  | 15.89 |
| Tian et al. (2001)        | R | U   | 200 | SUB | NA | 103.5 | 712.7 | 275.0 | 6.3 | 9.9  | 0.7 | 35.40 | 43.58 | 8.11  | 23.48 |
| <b>Xu, et al. [92]</b>    | R | U   | 60  | SUR | NA | 103.9 | 558.4 | 205.0 | 6.9 | 13.2 | 1.5 | 5.64  | 44.10 | 13.30 | 83.64 |
| Xu et al. (2013a)         | R | OCF | 60  | SUR | NA | 103.9 | 558.4 | 205.0 | 6.9 | 13.2 | 1.5 | 3.88  | 28.27 | 9.13  | 69.86 |
| Xu et al. (2013a)         | R | IU  | 60  | SUR | NA | 103.9 | 558.4 | 205.0 | 6.9 | 13.2 | 1.5 | 6.29  | 62.26 | 18.56 | 94.83 |
| Xu et al. (2013a)         | R | U   | 60  | SUB | NA | 103.9 | 558.4 | 205.0 | 6.9 | 13.2 | 1.5 | 6.25  | 59.92 | 17.09 | 92.51 |
| Xu et al. (2013a)         | R | OCF | 60  | SUB | NA | 103.9 | 558.4 | 205.0 | 6.9 | 13.2 | 1.5 | 5.14  | 41.73 | 12.32 | 79.68 |
| Xu et al. (2013a)         | R | IU  | 60  | SUB | NA | 103.9 | 558.4 | 205.0 | 6.9 | 13.2 | 1.5 | 6.66  | 68.15 | 15.53 | 92.88 |
| <b>Sun, et al. [93]</b>   | R | U   | 180 | SUR | NA | 105.3 | 284.8 | 280.0 | 6.3 | 25.0 | 1.6 | 19.69 | 62.10 | 15.35 | 45.29 |
| Sun et al. (2015)         | R | U   | 180 | SUR | IA | 105.3 | 284.8 | 280.0 | 6.3 | 25.0 | 1.6 | 17.91 | 68.50 | 16.97 | 45.77 |
| Sun et al. (2015)         | R | U   | 240 | SUR | NA | 105.3 | 284.8 | 280.0 | 6.3 | 25.0 | 1.6 | 23.03 | 61.46 | 15.61 | 37.67 |
| Sun et al. (2015)         | R | U   | 240 | SUR | IA | 105.3 | 284.8 | 280.0 | 6.3 | 25.0 | 1.6 | 21.28 | 64.81 | 16.00 | 37.15 |
| Sun et al. (2015)         | R | U   | 180 | SUB | NA | 109.2 | 584.7 | 280.0 | 6.3 | 25.0 | 1.6 | 18.94 | 55.41 | 12.89 | 41.01 |
| Sun et al. (2015)         | R | U   | 180 | SUB | IA | 109.2 | 584.7 | 280.0 | 6.3 | 25.0 | 1.6 | 16.30 | 56.49 | 12.78 | 38.56 |
| Sun et al. (2015)         | R | U   | 240 | SUB | NA | 109.2 | 584.7 | 280.0 | 6.3 | 25.0 | 1.6 | 19.80 | 47.87 | 11.15 | 29.96 |
| Sun et al. (2015)         | R | U   | 240 | SUB | IA | 109.2 | 584.7 | 280.0 | 6.3 | 25.0 | 1.6 | 17.68 | 46.83 | 10.09 | 27.68 |
| <b>He, et al. [94]</b>    | R | U   | 300 | SUB | NA | 100.2 | 623.3 | 260.0 | 5.3 | 25.2 | 1.8 | 26.28 | 63.57 | 14.06 | 30.78 |
| He et al. (2018b)         | R | U   | 300 | SUB | BA | 100.2 | 623.3 | 260.0 | 5.3 | 25.2 | 1.8 | 26.45 | 63.73 | 13.11 | 29.58 |
| He et al. (2018b)         | R | U   | 300 | SUB | BA | 100.2 | 623.3 | 260.0 | 5.3 | 25.2 | 1.8 | 26.24 | 71.79 | 14.69 | 31.60 |

|                   |   |     |     |     |    |       |        |       |     |      |     |       |       |       |       |
|-------------------|---|-----|-----|-----|----|-------|--------|-------|-----|------|-----|-------|-------|-------|-------|
| He et al. (2018b) | R | U   | 300 | SUB | IA | 100.2 | 623.3  | 260.0 | 5.3 | 25.2 | 1.8 | 26.26 | 58.85 | 11.61 | 27.54 |
| He et al. (2018b) | R | U   | 300 | SUB | IA | 100.2 | 623.3  | 260.0 | 5.3 | 25.2 | 1.8 | 26.44 | 68.02 | 13.51 | 30.11 |
| He et al. (2018b) | R | U   | 300 | SUB | NA | 101.4 | 1170.5 | 260.0 | 5.3 | 25.2 | 1.8 | 25.33 | 53.66 | 12.01 | 25.91 |
| He et al. (2018b) | R | U   | 300 | SUR | BA | 101.4 | 1170.5 | 260.0 | 5.3 | 25.2 | 1.8 | 24.99 | 59.08 | 12.98 | 27.05 |
| He et al. (2018b) | R | U   | 300 | SUR | BA | 101.4 | 1170.5 | 260.0 | 5.3 | 25.2 | 1.8 | 25.55 | 65.18 | 13.95 | 28.44 |
| He et al. (2018b) | R | U   | 300 | SUR | IA | 101.4 | 1170.5 | 260.0 | 5.3 | 25.2 | 1.8 | 24.44 | 53.92 | 11.39 | 24.89 |
| He et al. (2018b) | R | U   | 300 | SUR | IA | 101.4 | 1170.5 | 260.0 | 5.3 | 25.2 | 1.8 | 26.10 | 62.49 | 13.01 | 27.41 |
| Xu, et al. [95]   | R | OCF | 403 | SUB | NA | 103.9 | 558.4  | 302.0 | 7.4 | 30.3 | 1.8 | 24.86 | 41.17 | 8.35  | 19.16 |
| Xu et al. (2012)  | R | OCF | 162 | SUB | NA | 103.9 | 558.4  | 302.0 | 7.4 | 30.3 | 1.8 | 16.45 | 42.83 | 11.06 | 42.48 |
| Xu et al. (2012)  | R | OCF | 403 | SUB | NA | 103.9 | 558.4  | 302.0 | 7.4 | 30.3 | 1.8 | 26.52 | 45.38 | 8.90  | 20.14 |
| Xu et al. (2012)  | R | OCF | 162 | SUB | NA | 103.9 | 558.4  | 302.0 | 7.4 | 30.3 | 1.8 | 16.18 | 43.85 | 9.64  | 40.16 |
| Xu et al. (2012)  | R | IU  | 180 | SUB | NA | 103.9 | 558.4  | 302.0 | 7.4 | 30.3 | 1.8 | 18.08 | 60.09 | 14.33 | 44.21 |
| Cao, et al. [96]  | R | U   | 300 | SUR | NA | 105.2 | 859.7  | 285.0 | 7.4 | 35.0 | 2.1 | 24.78 | 62.44 | 13.66 | 28.62 |
| Cao et al. (2013) | R | U   | 370 | SUR | NA | 105.2 | 859.7  | 285.0 | 7.4 | 35.0 | 2.1 | 32.94 | 63.12 | 13.08 | 26.33 |
| Cao et al. (2013) | R | OA  | 375 | SUR | NA | 105.2 | 859.7  | 285.0 | 7.4 | 35.0 | 2.1 | 31.38 | 51.10 | 11.25 | 23.39 |
| Cao et al. (2013) | R | U   | 300 | SUB | NA | 107.0 | 728.5  | 285.0 | 7.4 | 35.0 | 2.1 | 24.56 | 64.26 | 12.97 | 29.35 |
| Cao et al. (2013) | R | U   | 370 | SUB | NA | 107.0 | 728.5  | 285.0 | 7.4 | 35.0 | 2.1 | 32.28 | 63.58 | 12.16 | 26.47 |
| Cao et al. (2013) | R | OA  | 375 | SUB | NA | 107.0 | 728.5  | 285.0 | 7.4 | 35.0 | 2.1 | 30.58 | 48.00 | 9.32  | 22.07 |
| Lin, et al. [97]  | R | U   | 100 | SUB | NA | 106.0 | 1035.9 | 285.0 | 5.4 | 24.6 | 1.6 | 13.36 | 55.51 | 14.13 | 63.15 |
| Lin et al. (2007) | R | U   | 200 | SUB | NA | 106.0 | 1035.9 | 285.0 | 5.4 | 24.6 | 1.6 | 23.19 | 60.53 | 12.00 | 36.38 |
| Lin et al. (2007) | R | U   | 300 | SUB | NA | 106.0 | 1035.9 | 285.0 | 5.4 | 24.6 | 1.6 | 26.19 | 53.74 | 12.31 | 27.44 |
| Lin et al. (2007) | R | U   | 350 | SUB | NA | 106.0 | 1035.9 | 285.0 | 5.4 | 24.6 | 1.6 | 29.02 | 55.10 | 13.00 | 26.30 |
| Xu, et al. [98]   | R | U   | 240 | SUB | MA | 101.4 | 1170.5 | 225.0 | 5.6 | 17.2 | 1.6 | 16.74 | 56.54 | 12.27 | 31.15 |
| Xu et al. (2017)  | R | U   | 240 | SUB | MA | 101.4 | 1170.5 | 225.0 | 5.6 | 17.2 | 1.6 | 13.75 | 50.30 | 10.68 | 27.84 |
| Xu et al. (2017)  | R | U   | 240 | SUB | NA | 101.4 | 1170.5 | 225.0 | 5.6 | 17.2 | 1.6 | 20.51 | 61.03 | 14.08 | 35.54 |
| Xu et al. (2017)  | R | U   | 240 | SUB | NA | 101.4 | 1170.5 | 225.0 | 5.6 | 17.2 | 1.6 | 18.63 | 57.96 | 13.49 | 33.69 |
| Xu et al. (2017)  | R | U   | 240 | SUB | MA | 106.1 | 929.6  | 225.0 | 5.6 | 17.2 | 1.6 | 17.05 | 59.54 | 13.16 | 32.68 |
| Xu et al. (2017)  | R | U   | 240 | SUB | MA | 106.1 | 929.6  | 225.0 | 5.6 | 17.2 | 1.6 | 14.66 | 52.44 | 11.15 | 29.01 |

|                           |   |    |     |     |    |       |       |       |     |      |     |       |       |       |       |
|---------------------------|---|----|-----|-----|----|-------|-------|-------|-----|------|-----|-------|-------|-------|-------|
| Xu et al. (2017)          | R | U  | 240 | SUB | NA | 106.1 | 929.6 | 225.0 | 5.6 | 17.2 | 1.6 | 20.08 | 60.20 | 13.76 | 35.13 |
| Xu et al. (2017)          | R | U  | 240 | SUB | NA | 106.1 | 929.6 | 225.0 | 5.6 | 17.2 | 1.6 | 18.63 | 58.12 | 13.41 | 33.85 |
| Feng, <i>et al.</i> [99]  | R | U  | 240 | SUR | NA | 100.2 | 623.3 | 285.0 | 6.4 | 22.8 | 1.6 | 22.42 | 70.83 | 17.85 | 38.74 |
| Feng et al. (2017)        | R | U  | 240 | SUR | BA | 100.2 | 623.3 | 285.0 | 6.4 | 22.8 | 1.6 | 22.63 | 66.94 | 16.39 | 36.91 |
| Feng et al. (2017)        | R | U  | 240 | SUR | BA | 100.2 | 623.3 | 285.0 | 6.4 | 22.8 | 1.6 | 22.09 | 59.93 | 15.28 | 35.14 |
| Feng et al. (2017)        | R | U  | 240 | SUR | BA | 100.2 | 623.3 | 285.0 | 6.4 | 22.8 | 1.6 | 22.52 | 69.16 | 17.22 | 37.96 |
| Feng et al. (2017)        | R | U  | 240 | SUR | BA | 100.2 | 623.3 | 285.0 | 6.4 | 22.8 | 1.6 | 22.29 | 66.26 | 16.24 | 36.52 |
| Wang, <i>et al.</i> [100] | R | U  | 180 | SUB | NA | 105.2 | 859.7 | 302.0 | 7.2 | 38.8 | 2.2 | 16.64 | 59.74 | 22.68 | 39.14 |
| Wang et al. (2012)        | R | U  | 240 | SUB | NA | 105.2 | 859.7 | 302.0 | 7.2 | 38.8 | 2.2 | 19.11 | 55.13 | 19.14 | 31.01 |
| Wang et al. (2012)        | R | U  | 180 | SUB | MA | 105.2 | 859.7 | 302.0 | 7.2 | 38.8 | 2.2 | 15.66 | 55.13 | 20.77 | 36.43 |
| Wang et al. (2012)        | R | U  | 240 | SUB | MA | 105.2 | 859.7 | 302.0 | 7.2 | 38.8 | 2.2 | 17.56 | 46.84 | 17.06 | 28.20 |
| Wang et al. (2012)        | R | U  | 180 | SUB | NA | 105.2 | 859.7 | 302.0 | 7.2 | 38.8 | 2.2 | 18.30 | 68.55 | 25.90 | 44.38 |
| Wang et al. (2012)        | R | U  | 240 | SUB | NA | 105.2 | 859.7 | 302.0 | 7.2 | 38.8 | 2.2 | 21.46 | 61.68 | 21.25 | 34.52 |
| Wang et al. (2012)        | R | U  | 180 | SUB | MA | 105.2 | 859.7 | 302.0 | 7.2 | 38.8 | 2.2 | 17.87 | 63.32 | 23.68 | 41.43 |
| Wang et al. (2012)        | R | U  | 240 | SUB | MA | 105.2 | 859.7 | 302.0 | 7.2 | 38.8 | 2.2 | 21.17 | 54.95 | 19.89 | 32.81 |
| Sun, <i>et al.</i> [101]  | R | U  | 225 | SUB | NA | 102.9 | 887.8 | 280.0 | 6.3 | 22.8 | 1.6 | 23.34 | 63.24 | 13.63 | 37.38 |
| Sun et al. (2016a)        | R | IU | 225 | SUB | NA | 102.9 | 887.8 | 280.0 | 6.3 | 22.8 | 1.6 | 23.22 | 70.32 | 14.82 | 38.98 |
| Sun et al. (2016a)        | R | U  | 225 | SUB | NA | 102.9 | 887.8 | 280.0 | 6.3 | 22.8 | 1.6 | 24.12 | 67.13 | 14.75 | 39.52 |
| Sun et al. (2016a)        | R | U  | 225 | SUB | NA | 102.9 | 887.8 | 280.0 | 6.3 | 22.8 | 1.6 | 23.33 | 67.63 | 13.86 | 37.70 |
| Sun et al. (2016a)        | R | U  | 225 | SUB | NA | 102.9 | 887.8 | 280.0 | 6.3 | 22.8 | 1.6 | 23.67 | 70.71 | 14.79 | 39.25 |
| Sun, <i>et al.</i> [102]  | R | U  | 225 | SUB | NA | 100.2 | 623.3 | 280.0 | 6.3 | 22.5 | 1.6 | 23.02 | 66.93 | 17.06 | 38.06 |
| Sun et al. (2018a)        | R | U  | 225 | SUB | BA | 100.2 | 623.3 | 280.0 | 6.3 | 22.5 | 1.6 | 23.17 | 69.48 | 16.58 | 37.48 |
| Sun et al. (2018a)        | R | U  | 225 | SUB | BA | 100.2 | 623.3 | 280.0 | 6.3 | 22.5 | 1.6 | 22.65 | 65.87 | 15.44 | 35.68 |
| Lin, <i>et al.</i> [103]  | R | U  | 100 | SUR | NA | 103.9 | 558.4 | 505.0 | 7.2 | 9.8  | 0.8 | 13.83 | 50.64 | 12.73 | 57.80 |
| Lin et al. (2012)         | R | U  | 200 | SUR | NA | 103.9 | 558.4 | 505.0 | 7.2 | 9.8  | 0.8 | 19.03 | 52.88 | 15.52 | 36.79 |
| Lin et al. (2012)         | R | U  | 300 | SUR | NA | 103.9 | 558.4 | 505.0 | 7.2 | 9.8  | 0.8 | 23.26 | 53.05 | 13.10 | 26.60 |
| Lin et al. (2012)         | R | U  | 400 | SUR | NA | 103.9 | 558.4 | 505.0 | 7.2 | 9.8  | 0.8 | 28.55 | 43.93 | 10.80 | 20.76 |
| Lin et al. (2012)         | R | U  | 100 | SUB | NA | 105.2 | 859.7 | 505.0 | 7.2 | 9.8  | 0.8 | 13.40 | 51.84 | 8.06  | 64.85 |

|                                                                 |   |    |       |     |    |       |        |       |     |      |     |       |       |       |       |
|-----------------------------------------------------------------|---|----|-------|-----|----|-------|--------|-------|-----|------|-----|-------|-------|-------|-------|
| Lin et al. (2012)                                               | R | U  | 200   | SUB | NA | 105.2 | 859.7  | 505.0 | 7.2 | 9.8  | 0.8 | 19.27 | 55.63 | 13.97 | 40.41 |
| Lin et al. (2012)                                               | R | U  | 300   | SUB | NA | 105.2 | 859.7  | 505.0 | 7.2 | 9.8  | 0.8 | 24.18 | 56.61 | 12.40 | 29.18 |
| Lin et al. (2012)                                               | R | U  | 400   | SUB | NA | 105.2 | 859.7  | 505.0 | 7.2 | 9.8  | 0.8 | 29.69 | 45.33 | 9.86  | 22.02 |
| <b>Sun, Zhang, Xiao, Shi, Muller, Van Zwieten and Wang [32]</b> |   |    |       |     |    |       |        |       |     |      |     |       |       |       |       |
| Sun et al. (2019a)                                              | R | U  | 200   | SUB | BA | 106.8 | 802.2  | 268.0 | 7.3 | 5.7  | 1.5 | 21.37 | 61.73 | 17.93 | 43.08 |
| Sun et al. (2019a)                                              | R | U  | 200   | SUB | BA | 106.8 | 802.2  | 268.0 | 7.3 | 5.7  | 1.5 | 21.65 | 54.47 | 16.48 | 41.29 |
| Sun et al. (2019a)                                              | R | U  | 200   | SUB | BA | 106.8 | 802.2  | 268.0 | 7.3 | 5.7  | 1.5 | 21.70 | 52.70 | 15.66 | 40.17 |
| Tang, <i>et al.</i> [104]                                       | R | U  | 225   | SUB | NA | 109.2 | 584.7  | 275.0 | 6.6 | 22.8 | 1.4 | 14.13 | 46.76 | 12.11 | 28.52 |
| Tang et al. (2018)                                              | R | U  | 157.5 | SUB | NA | 109.2 | 584.7  | 275.0 | 6.6 | 22.8 | 1.4 | 12.21 | 45.06 | 10.03 | 33.66 |
| Tang et al. (2018)                                              | R | IU | 225   | SUB | NA | 109.2 | 584.7  | 275.0 | 6.6 | 22.8 | 1.4 | 17.50 | 58.87 | 14.95 | 33.51 |
| Tang et al. (2018)                                              | R | IU | 157.5 | SUB | NA | 109.2 | 584.7  | 275.0 | 6.6 | 22.8 | 1.4 | 14.75 | 62.18 | 14.83 | 41.93 |
| Tang et al. (2018)                                              | R | U  | 225   | SUB | NA | 100.2 | 623.3  | 275.0 | 6.6 | 22.8 | 1.4 | 21.64 | 61.75 | 16.39 | 37.41 |
| Tang et al. (2018)                                              | R | U  | 157.5 | SUB | NA | 100.2 | 623.3  | 275.0 | 6.6 | 22.8 | 1.4 | 18.40 | 59.91 | 14.07 | 44.24 |
| Tang et al. (2018)                                              | R | IU | 225   | SUB | NA | 100.2 | 623.3  | 275.0 | 6.6 | 22.8 | 1.4 | 22.44 | 73.27 | 19.03 | 41.46 |
| Tang et al. (2018)                                              | R | IU | 157.5 | SUB | NA | 100.2 | 623.3  | 275.0 | 6.6 | 22.8 | 1.4 | 18.05 | 76.85 | 19.22 | 51.23 |
| Sun, <i>et al.</i> [105]                                        | R | U  | 270   | SUR | NA | 103.4 | 1069.3 | 205.0 | 5.4 | 68.0 | 3.5 | 22.29 | 59.49 | 13.91 | 30.23 |
| Sun et al. (2019b)                                              | R | U  | 270   | SUB | MA | 103.4 | 1069.3 | 205.0 | 5.4 | 68.0 | 3.5 | 21.78 | 61.87 | 13.80 | 29.90 |
| Sun et al. (2019b)                                              | R | U  | 270   | SUR | BA | 103.4 | 1069.3 | 205.0 | 5.4 | 68.0 | 3.5 | 22.64 | 65.27 | 14.76 | 31.45 |
| Sun et al. (2019b)                                              | R | U  | 270   | SUB | BA | 103.4 | 1069.3 | 205.0 | 5.4 | 68.0 | 3.5 | 22.61 | 69.24 | 15.03 | 31.79 |
| Li, <i>et al.</i> [106]                                         | R | OA | 135   | SUR | NA | 108.0 | 703.7  | 114.0 | 6.8 | 13.7 | 0.5 | 17.66 | 42.09 | 13.55 | 52.08 |
| Li et al. (2015d)                                               | R | OA | 180   | SUR | NA | 108.0 | 703.7  | 114.0 | 6.8 | 13.7 | 0.5 | 20.13 | 72.45 | 16.73 | 45.44 |
| Li et al. (2015d)                                               | R | OA | 225   | SUR | NA | 108.0 | 703.7  | 114.0 | 6.8 | 13.7 | 0.5 | 24.18 | 68.84 | 14.97 | 37.91 |
| Li et al. (2015d)                                               | R | OA | 270   | SUR | NA | 108.0 | 703.7  | 114.0 | 6.8 | 13.7 | 0.5 | 26.84 | 70.33 | 15.13 | 34.25 |
| Li et al. (2015d)                                               | R | OA | 360   | SUR | NA | 108.0 | 703.7  | 114.0 | 6.8 | 13.7 | 0.5 | 32.91 | 59.81 | 13.19 | 27.37 |
| Li et al. (2015d)                                               | R | OA | 135   | SUB | NA | 113.4 | 605.2  | 114.0 | 6.8 | 13.7 | 0.5 | 16.04 | 36.92 | 12.08 | 45.42 |
| Li et al. (2015d)                                               | R | OA | 180   | SUB | NA | 113.4 | 605.2  | 114.0 | 6.8 | 13.7 | 0.5 | 18.44 | 63.92 | 14.93 | 39.98 |

|                     |   |     |     |     |    |       |        |       |     |      |     |       |       |       |       |
|---------------------|---|-----|-----|-----|----|-------|--------|-------|-----|------|-----|-------|-------|-------|-------|
| Li et al. (2015d)   | R | OA  | 225 | SUB | NA | 113.4 | 605.2  | 114.0 | 6.8 | 13.7 | 0.5 | 22.31 | 60.20 | 13.11 | 33.14 |
| Li et al. (2015d)   | R | OA  | 270 | SUB | NA | 113.4 | 605.2  | 114.0 | 6.8 | 13.7 | 0.5 | 24.86 | 60.69 | 12.96 | 29.60 |
| Li et al. (2015d)   | R | OA  | 360 | SUB | NA | 113.4 | 605.2  | 114.0 | 6.8 | 13.7 | 0.5 | 31.32 | 50.97 | 10.98 | 23.43 |
| Li et al. (2015d)   | R | OA  | 135 | SUR | NA | 104.4 | 748.7  | 114.0 | 6.8 | 13.7 | 0.5 | 10.85 | 58.93 | 27.79 | 61.17 |
| Li et al. (2015d)   | R | OA  | 180 | SUR | NA | 104.4 | 748.7  | 114.0 | 6.8 | 13.7 | 0.5 | 18.09 | 57.71 | 11.98 | 37.02 |
| Li et al. (2015d)   | R | OA  | 225 | SUR | NA | 104.4 | 748.7  | 114.0 | 6.8 | 13.7 | 0.5 | 21.55 | 53.47 | 10.37 | 30.11 |
| Li et al. (2015d)   | R | OA  | 270 | SUR | NA | 104.4 | 748.7  | 114.0 | 6.8 | 13.7 | 0.5 | 23.67 | 55.19 | 10.92 | 27.33 |
| Li et al. (2015d)   | R | OA  | 360 | SUR | NA | 104.4 | 748.7  | 114.0 | 6.8 | 13.7 | 0.5 | 29.77 | 46.42 | 9.37  | 21.63 |
| Zhao, et al. [107]  | R | U   | 80  | SUR | NA | 109.9 | 427.5  | 314.0 | 6.8 | 11.2 | 1.0 | 10.68 | 49.25 | 20.70 | 81.72 |
| Zhao et al. (2010a) | R | U   | 160 | SUR | NA | 109.9 | 427.5  | 314.0 | 6.8 | 11.2 | 1.0 | 19.02 | 60.23 | 16.42 | 47.10 |
| Zhao et al. (2010a) | R | U   | 240 | SUR | NA | 109.9 | 427.5  | 314.0 | 6.8 | 11.2 | 1.0 | 23.77 | 67.26 | 17.53 | 38.03 |
| Zhao et al. (2010a) | R | U   | 80  | SUB | NA | 109.9 | 427.5  | 314.0 | 6.8 | 11.2 | 1.0 | 10.53 | 44.80 | 17.81 | 80.84 |
| Zhao et al. (2010a) | R | U   | 160 | SUB | NA | 109.9 | 427.5  | 314.0 | 6.8 | 11.2 | 1.0 | 19.20 | 55.30 | 13.94 | 45.54 |
| Zhao et al. (2010a) | R | U   | 240 | SUB | NA | 109.9 | 427.5  | 314.0 | 6.8 | 11.2 | 1.0 | 23.96 | 62.73 | 15.80 | 36.91 |
| Cai, et al. [108]   | R | OCF | 90  | SUR | NA | 83.9  | 916.5  | 423.0 | 5.4 | 14.8 | 1.7 | 10.75 | 32.57 | 23.04 | 70.73 |
| Cai et al. (1986)   | R | OCF | 90  | SUB | NA | 83.9  | 916.5  | 423.0 | 5.4 | 14.8 | 1.7 | 10.77 | 40.33 | 23.58 | 71.55 |
| Cai et al. (1986)   | R | OCF | 90  | SUB | NA | 83.6  | 1263.2 | 423.0 | 5.4 | 14.8 | 1.7 | 11.38 | 44.05 | 26.18 | 77.02 |
| Cai et al. (1986)   | R | OCF | 90  | SUB | NA | 83.6  | 1263.2 | 423.0 | 5.4 | 14.8 | 1.7 | 10.67 | 44.69 | 27.21 | 76.40 |
| Cai et al. (1986)   | R | IU  | 90  | SUR | NA | 83.6  | 1263.2 | 423.0 | 5.4 | 14.8 | 1.7 | 11.28 | 57.90 | 30.74 | 83.28 |
| Cai et al. (1986)   | R | IU  | 90  | SUB | NA | 83.6  | 1263.2 | 423.0 | 5.4 | 14.8 | 1.7 | 11.18 | 59.52 | 32.01 | 84.78 |
| Cai et al. (1986)   | R | IU  | 90  | SUB | NA | 83.6  | 1263.2 | 423.0 | 5.4 | 14.8 | 1.7 | 11.10 | 60.24 | 32.61 | 85.38 |
| Liao, et al. [109]  | R | U   | 330 | SUR | NA | 105.7 | 645.6  | 355.0 | 6.9 | 13.2 | 1.5 | 26.31 | 56.40 | 11.81 | 26.08 |
| Liao et al. (2015)  | R | U   | 330 | SUR | NA | 105.7 | 645.6  | 355.0 | 6.9 | 13.2 | 1.5 | 26.43 | 51.41 | 11.00 | 25.07 |
| Liao et al. (2015)  | R | IU  | 240 | SUB | NA | 105.7 | 645.6  | 355.0 | 6.9 | 13.2 | 1.5 | 21.04 | 68.27 | 16.15 | 36.90 |
| Liao et al. (2015)  | R | IU  | 240 | SUB | NA | 105.7 | 645.6  | 355.0 | 6.9 | 13.2 | 1.5 | 21.70 | 75.09 | 17.01 | 38.43 |
| Li, et al. [110]    | R | U   | 180 | SUR | NA | 112.8 | 460.1  | 517.0 | 6.8 | 35.0 | 2.7 | 20.49 | 63.79 | 15.79 | 42.63 |
| Li et al. (2009)    | R | U   | 180 | SUR | IA | 112.8 | 460.1  | 517.0 | 6.8 | 35.0 | 2.7 | 20.05 | 73.82 | 16.53 | 43.28 |
| Li et al. (2009)    | R | U   | 180 | SUB | NA | 112.8 | 460.1  | 517.0 | 6.8 | 35.0 | 2.7 | 20.09 | 54.54 | 13.45 | 39.80 |

|                                                               |   |     |     |     |    |       |       |       |      |      |     |       |       |       |       |
|---------------------------------------------------------------|---|-----|-----|-----|----|-------|-------|-------|------|------|-----|-------|-------|-------|-------|
| Li et al. (2009)                                              | R | U   | 180 | SUB | IA | 112.8 | 460.1 | 517.0 | 6.8  | 35.0 | 2.7 | 19.41 | 65.01 | 14.68 | 40.97 |
| Jiang, Fan, Pang,<br>Zhang, Li, Jiang<br>and Wu [35]          | R | OCF | 270 | SUR | NA | 119.1 | 655.3 | 280.0 | 6.1  | 31.7 | 2.1 | 25.19 | 61.54 | 13.99 | 33.56 |
| Jiang et al. (2018)                                           | R | OCF | 270 | SUR | NA | 119.1 | 655.3 | 280.0 | 6.1  | 31.7 | 2.1 | 25.35 | 55.69 | 13.03 | 32.33 |
| Jiang et al. (2018)                                           | R | IU  | 270 | SUB | NA | 119.1 | 655.3 | 280.0 | 6.1  | 31.7 | 2.1 | 25.51 | 66.59 | 14.48 | 34.38 |
| Jiang et al. (2018)                                           | R | IU  | 270 | SUB | NA | 119.1 | 655.3 | 280.0 | 6.1  | 31.7 | 2.1 | 25.44 | 67.95 | 14.95 | 34.99 |
| Jiang et al. (2018)                                           | R | IU  | 270 | SUB | NA | 119.1 | 655.3 | 280.0 | 6.1  | 31.7 | 2.1 | 25.54 | 69.16 | 15.33 | 35.56 |
| Jiang et al. (2018)                                           | R | OA  | 270 | SUB | NA | 119.1 | 655.3 | 280.0 | 6.1  | 31.7 | 2.1 | 25.01 | 64.19 | 13.80 | 33.22 |
| He, Liu, Yuan, Ni,<br>Zaman, Luo,<br>Lindsey and Ding<br>[94] | R | U   | 300 | SUR | NA | 122.3 | 611.4 | 260.0 | 22.3 | 5.3  | 1.8 | 30.54 | 18.64 | 4.87  | 24.79 |
| He et al. (2018b)                                             | R | U   | 300 | SUR | BA | 122.3 | 611.4 | 260.0 | 22.3 | 5.3  | 1.8 | 27.19 | 23.26 | 7.21  | 26.80 |
| He et al. (2018b)                                             | R | U   | 300 | SUR | BA | 122.3 | 611.4 | 260.0 | 22.3 | 5.3  | 1.8 | 28.97 | 28.21 | 7.12  | 27.47 |
| He et al. (2018b)                                             | R | U   | 300 | SUR | IA | 122.3 | 611.4 | 260.0 | 22.3 | 5.3  | 1.8 | 31.81 | 24.34 | 6.29  | 27.56 |
| He et al. (2018b)                                             | R | U   | 300 | SUR | IA | 122.3 | 611.4 | 260.0 | 22.3 | 5.3  | 1.8 | 28.54 | 31.51 | 9.62  | 30.96 |
| He et al. (2018b)                                             | R | U   | 300 | SUR | BA | 122.3 | 611.4 | 260.0 | 22.3 | 5.3  | 1.8 | 28.59 | 27.22 | 6.55  | 25.68 |
| He et al. (2018b)                                             | R | U   | 300 | SUR | BA | 122.3 | 611.4 | 260.0 | 22.3 | 5.3  | 1.8 | 28.57 | 36.87 | 8.92  | 29.14 |
| He et al. (2018b)                                             | R | U   | 300 | SUR | IA | 122.3 | 611.4 | 260.0 | 22.3 | 5.3  | 1.8 | 28.42 | 41.58 | 10.21 | 30.94 |
| He et al. (2018b)                                             | R | U   | 300 | SUR | IA | 122.3 | 611.4 | 260.0 | 22.3 | 5.3  | 1.8 | 28.83 | 36.48 | 9.92  | 30.71 |
| He et al. (2018b)                                             | R | U   | 300 | SUR | IA | 122.3 | 611.4 | 260.0 | 22.3 | 5.3  | 1.8 | 29.25 | 40.97 | 9.55  | 30.39 |
| Yang, <i>et al.</i> [111]                                     | R | U   | 270 | SUR | NA | 122.3 | 611.4 | 195.5 | 16.6 | 7.5  | 0.9 | 25.72 | 57.38 | 14.39 | 32.77 |
| Yang et al. (2020)                                            | R | U   | 270 | SUB | NA | 122.3 | 611.4 | 195.5 | 16.6 | 7.5  | 0.9 | 24.06 | 67.90 | 17.38 | 35.99 |
| Yang et al. (2020)                                            | R | U   | 270 | SUR | IA | 122.3 | 611.4 | 195.5 | 16.6 | 7.5  | 0.9 | 24.34 | 70.87 | 17.09 | 35.74 |
| Yang et al. (2020)                                            | R | U   | 270 | SUB | IA | 122.3 | 611.4 | 195.5 | 16.6 | 7.5  | 0.9 | 21.59 | 84.99 | 22.77 | 41.73 |
| Yang et al. (2020)                                            | R | U   | 270 | SUR | NA | 122.3 | 611.4 | 195.5 | 16.6 | 7.5  | 0.9 | 26.84 | 58.07 | 13.39 | 31.57 |
| Yang et al. (2020)                                            | R | U   | 270 | SUB | NA | 122.3 | 611.4 | 195.5 | 16.6 | 7.5  | 0.9 | 25.97 | 66.53 | 15.39 | 33.89 |

---

|                                                |   |   |     |     |    |       |       |       |      |     |     |       |       |       |       |
|------------------------------------------------|---|---|-----|-----|----|-------|-------|-------|------|-----|-----|-------|-------|-------|-------|
| <b>Yang et al. (2020)</b>                      | R | U | 270 | SUR | IA | 122.3 | 611.4 | 195.5 | 16.6 | 7.5 | 0.9 | 26.54 | 70.42 | 15.40 | 34.17 |
| <b>Yang et al. (2020)</b>                      | R | U | 270 | SUB | IA | 122.3 | 611.4 | 195.5 | 16.6 | 7.5 | 0.9 | 23.65 | 82.59 | 20.15 | 39.10 |
| <b>Zhao, Xie, Xiong,<br/>Yan, Xing and Zhu</b> |   |   |     |     |    |       |       |       |      |     |     |       |       |       |       |
| <b>[36]</b>                                    | R | U | 100 | SUB | NA | 119.5 | 623.0 | 266.0 | 27.8 | 6.1 | 1.8 | 18.36 | 40.54 | 11.56 | 50.66 |
| <b>Zhao et al. (2009b)</b>                     | R | U | 300 | SUB | NA | 119.5 | 623.0 | 266.0 | 27.8 | 6.1 | 1.8 | 28.87 | 39.07 | 18.50 | 31.37 |

---



## References

1. Roelcke, M.; Li, S.X.; Tian, X.H.; Gao, Y.J.; Richter, J. In situ comparisons of ammonia volatilization from N fertilizers in Chinese loess soils. *Nutr. Cycl. Agroecosys.* **2002**, *62*, 73–88, doi:10.1023/A:1015186605419.
2. Li, Q.Q.; Yang, A.L.; Wang, Z.H.; Roelcke, M.; Chen, X.P.; Zhang, F.S.; Pasda, G.; Zerulla, W.; Wissemeier, A.H.; Liu, X.J. Effect of a new urease inhibitor on ammonia volatilization and nitrogen utilization in wheat in north and northwest China. *Field Crop Res.* **2015**, *175*, 96–105, doi:10.1016/j.fcr.2015.02.005.
3. Jing, J.Y.; Sun, X.; Yang, Y.; Li, N.; Tian, X.X.; Lu, S.Q.; Wang, L.Q. Ammonia volatilization of winter wheat canopy under different nitrogen rates. *J. Agro-Environ. Sci.* **2017**, *36*, 401–408.
4. Wu, Y.J.; Sun, Y.J.; Guo, X.Y.; Huang, K.Q.; Zhang, H.Z.; Zhang, S.L. Impact of wheat straw and tobacco straw biochar on nitrification of nitrogenous fertilizer and emission of N<sub>2</sub>O and NH<sub>3</sub>. *J. Northwest AF Univ.* **2019**, *47*, 60–66.
5. Yang, Y.; Na, L.; Wang, L.; Zhao, Y.; Wang, W.J. Effects of Ridge Tillage Practices on Reducing Ammonia Volatilization from Winter Wheat Fields in Southern Loess Plateau of China. *Research of Environmental Sciences*. **2015**, *28*, 431–439.
6. ShangGuan, Y.X.; Shi, R.P.; Han, K.; Wang, L.Q. The dynamics of ammonia volatilization in winter wheat field with furrow planting system and ridge with plastic film mulching. *Agric. Res. Arid. Areas* **2011**, *29*, 163–168.
7. ShangGuan, Y.X.; Shi, R.P.; Li, N.; Han, K.; Li, H.K.; Wang, L.Q. Factors influencing ammonia volatilization in a winter wheat field with plastic film mulched ridges and unmulched furrows. *Environ. Sci.* **2012**, *33*, 1987–1993.
8. Fu, X.W.; Liu, W.; Xu, W.X.; Zhang, Y.J.; She, X.J.; K., R.X.; Fang, Y.F. Response of Soil Ammonia Volatilization to Nitrogen Fertilizer in Winter Wheat-Summer Soybean Rotation System in Ili River Valley. *J. Xinjiang Agric. Univ.* **2018**, *41*, 79–85.
9. Xu, W.L.; Liu, H.; Zhang, Y.S.; Wang, X.H.; Liao, Z.W. In Situ monitoring of ammonia volatilization from grey desert soil under different in Xinjiang. *Acta Ecol. Sin.* **2009**, *29*, 4565–4571.
10. Wang, H.Y.; Zhang, Y.T.; Chen, A.Q.; Liu, H.B.; Zhai, L.M.; Lei, B.K.; Ren, T.Z. An optimal regional nitrogen application threshold for wheat in the North China Plain considering yield and environmental effects. *Field Crop Res.* **2017**, *207*, 52–61, doi:10.1016/j.fcr.2017.03.002.
11. Wang, Z.H.; Liu, X.J.; Ju, X.T.; Zhang, F.S.; Malhi, S.S. Ammonia Volatilization Loss from Surface-Broadcast Urea: Comparison of Vented- and Closed-Chamber Methods and Loss in Winter Wheat-Summer Maize Rotation in North China Plain. *Commun. Soil Sci. Plant Anal.* **2004**, *35*, 2917–2939.
12. Liu, X.; Ju, X.; Zhang, F.; Pan, J.; Christie, P. Nitrogen dynamics and budgets in a winter wheat-maize cropping system in the North China Plain. *Field Crop Res.* **2003**, *83*, 111–124.
13. Yang, Q.L.; Liu, P.; Dong, S.T.; Zhang, J.W.; Zhao, B. Effects of fertilizer type and rate on summer maize grain yield and ammonia volatilization loss in northern China. *J. Soil Sediment* **2019**, *19*, 2200–2211, doi:10.1007/s11368-019-02254-1.
14. Shan, N.; Zhao, T.K.; Bi, X.Q.; An, Z.Z.; Zhao, L.P.; Du, F.L. Ammonia Volatilization from Wheat Soil Under Different Nitrogen Rates. *J. Agro-Environ. Sci.* **2014**, *16*, 1858–1865.
15. Shan, N.; Bi, X.Q.; Du, F.L.; An, Z.Z.; Zhao, L.P.; Zhao, T.K. Effect of basal nitrogen fertilization on cornfield ammonia volatilization loss ahead of winter in-site conditions. *Soils Fertil. Sci. China* **2013**, *47*–51, doi/10.13930/j.cnki.cjea.210133
16. Wang, L.; Dong, S.T.; Liu, P.; Zhang, J.W.; Zhao, B.; Zheng, F.X. The interactive effects of water and nitrogen addition on ammonia volatilization loss and yield of winter wheat. *Chin. J. Appl. Ecol.* **2018**, *29*, 1919–1927, doi:10.13287/j.1001-9332.201806.026.
17. Zheng, F.X.; Dong, S.T.; Liu, P.; Zhang, J.W.; Zhao, B. Effects of combined application of manure and chemical fertilizers on ammonia volatilization loss and yield of winter wheat. *Plant Nutr. Fertil. Sci.* **2017**, *23*, 567–577.
18. Xiao, J.; Fan, J.L.; Ye, G.P.; Liu, D.Y.; Yan, J.; Luo, J.F.; Houlbrooke, D.J.; Ding, W.X. Ammonia volatilization from fluvo-aquic clay soil and its influencing factors during wheat growing season under different fertilization. *J. Agro-Environ. Sci.* **2016**, *35*, 2011–2018.
19. Zhou, L.P.; Yang, L.P.; Bai, Y.L.; Lu, Y.L.; Wang, L.; Ni, L. Comparison of several slow-released nitrogen fertilizers in ammonia volatilization and nitrogen utilization in summer maize field. *J. Plant Nutr. Fertil.* **2016**, *22*, 1449–1457.
20. Ji, Y.Z.; Ju, X.T.; Liu, X.Y.; Zhang, L.J.; Li, X.; Liu, N. Ampact of Different Nitrogen Application on Nitrogen Movement and Gaseous Loss of Winter Wheat Fields. *J. Soil Water Conserv.* **2010**, *24*, 113–118.
21. Ma, Y.L.; Ji, Y.Z.; Li, X.; Zhang, L.; Ju, X.T.; Zhang, L.J. Effects of N fertilization rates on the NH<sub>3</sub> volatilization and N<sub>2</sub>O emissions from the wheat-maize rotation system in North China Plain. *Ecol. Environ. Sci.* **2012**, *21*, 225–230.
22. Wang, X.B.; Liang, G.Q.; Zhou, W.; Sun, J.W.; Pei, X.X.; Xia, W.J. Effect of optimized nitrogen application on denitrification losses and N<sub>2</sub>O emissions from soil in winter wheat/summer corn rotation system in North China. *J. Plant Nutr. Fertil.* **2009**, *15*, 48–54.
23. Li, H.J.; Zhao, T.K.; Sun, M.; Li, Z.S.; ZHong, Z.W.; Zhang, Y.P. Effects of Different Nitrogen Fertilizer Application on Winter Wheat Yield and Soil Ammonia Volatilization in Fluvio-Aquic Soil Region. *Shandong Agric. Sci.* **2020**, *52*, 51–55.
24. Meng, Y.; Wang, W.H.; Pang, R.Y.; Zou, X.X. Effects of Water,Fertilizer and Straw Co-Management on Soil Ammonia Volatilization and Crop Yield in Wheat-Maize Rotation System. *Shandong Agric. Sci.* **2021**, *53*, 79–85.

25. Huang, J.; Duan, Y.H.; Xu, M.G.; Zhai, L.M.; Zhang, X.B.; Wang, B.R.; Zhang, Y.Z.; Gao, S.D.; Sun, N. Nitrogen mobility, ammonia volatilization, and estimated leaching loss from long-term manure incorporation in red soil. *J. Integr. Agr.* **2017**, *16*, 2082–2092, doi:10.1016/S2095-3119(16)61498-3.
26. Li, X.X.; Yang, J.; Wang, C.Q.; Bai, G.C.; You, L.Y.; Yi, Y.L.; Huang, F.; Li, B.; Zeng, P.Y. Effects of Pig Manure Applications on Ammonia Volatilization in Soil During Rice Season in Chengdu Plain. *J. Agro-Environ. Sci.* **2015**, *34*, 2236–2244.
27. Zhang, C.; Han, X.Y.; Li, X.Q.; Huang, B.X.; Zhu, B.; Su, F.; Ju, X.T. Ammonia volatilization in winter wheat/summer maize rotation system of purple soil in hilly area of Central Sichuan Basin. *Chin. J. Eco-Agric.* **2015**, 1359–1366.
28. Sun, L.Y.; Wu, Z.; Ma, Y.L.; Liu, Y.L.; Xiong, Z.Q. Ammonia volatilization and atmospheric N deposition following straw and urea application from a rice-wheat rotation in southeastern China. *Atmos. Environ.* **2018**, *181*, 97–105.
29. Tian, G.; Cai, Z.; Cao, J.; Li, X. Factors affecting ammonia volatilization from a rice–wheat rotation system. *Chemosphere* **2001**, *42*, 123–129.
30. He, T.H.; Liu, D.Y.; Yuan, J.J.; Luo, J.F.; Lindsey, S.; Bolan, N.; Ding, W. Effects of application of inhibitors and biochar to fertilizer on gaseous nitrogen emissions from an intensively managed wheat field. *Sci. Total Environ.* **2018**, *628/629*, 121–130, doi:10.1016/j.scitotenv.2018.02.048.
31. Tian, G.M.; Cao, J.L.; Cai, Z.C.; Ren, L.T. Ammonia Volatilization from Winter Wheat Field Top Dressed with Urea. *Pedosphere* **1998**, *8*, 331–336.
32. Sun, H.J.; Zhang, H.L.; Xiao, H.D.; Shi, W.M.; Muller, K.; Van Zwieten, L.; Wang, H.L. Wheat straw biochar application increases ammonia volatilization from an urban compacted soil giving a short-term reduction in fertilizer nitrogen use efficiency. *J. Soil Sediment* **2019**, *19*, 1624–1631, doi:10.1007/s11368-018-2169-y.
33. Pacholski, A.; Cai, G.; Nieder, R.; Richter, J.; Fan, X.; Zhu, Z.; Roelcke, M. Calibration of a simple method for determining ammonia volatilization in the field—Comparative measurements in Henan Province, China. *Nutr. Cycl. Agroecosys.* **2006**, *74*, 259–273.
34. Huang, P.; Zhang, J.B.; Zhu, A.N.; Xin, X.L.; Zhang, C.Z.; Ma, D.H.; Yang, S.; Mirza, Z.; Wu, S.J. Coupled water and nitrogen (N) management as a key strategy for the mitigation of gaseous N losses in the Huang-Huai-Hai Plain. *Biol. Fert. Soils* **2015**, *51*, 333–342, doi:10.1007/s00374-014-0981-0.
35. Jiang, J.; Fan, H.; Pang, B.; Zhang, J.; Li, Z.; Jiang, S.; Wu, J. Assessment of reactive nitrogen mitigation potential of different nitrogen treatments under direct-seeded rice and wheat cropping system. *Environ. Sci. Pollut. Res.* **2018**, *25*, 20241–20254, doi:10.1007/s11356-018-2104-1.
36. Zhao, X.; Xie, Y.X.; Xiong, Z.Q.; Yan, X.Y.; Xing, G.X.; Zhu, Z.L. Nitrogen fate and environmental consequence in paddy soil under rice-wheat rotation in the Taihu lake region, China. *Plant Soil* **2009**, *319*, 225–234, doi:10.1007/s11104-008-9865-0.
37. Han, K.; Zhou, C.J.; Wang, L.Q. Reducing Ammonia Volatilization from Maize Fields with Separation of Nitrogen Fertilizer and Water in an Alternating Furrow Irrigation System. *J. Integr. Agr.* **2014**, *13*, 1099–1112, doi:10.1016/S2095-3119(13)60493-1.
38. Zhang, T.; Liu, H.; Luo, J.; Wang, H.; Zhai, L.; Geng, Y.; Zhang, Y.; Li, J.; Lei, Q.; Bashir, M.A.; et al. Long-term manure application increased greenhouse gas emissions but had no effect on ammonia volatilization in a Northern China upland field. *Sci. Total Environ.* **2018**, *633*, 230–239, doi:10.1016/j.scitotenv.2018.03.069.
39. Li, Q.Q.; Li, Y.F.; Gao, Q.; Li, S.Q.; Chen, X.P.; Zhang, F.S.; Liu, X.J. Effect of conventional and optimized nitrogen fertilization on spring maize yield, ammonia volatilization and nitrogen balance in soil-maize system. *J. Plant Nutr. Fertil.* **2015**, *21*, 571–579.
40. Lei, Y.L.; Wang, L.Q.; Xue, L.; Li, Z.J.; Shang, H.B. Effect of alternative irrigation and fertilization on soil ammonia volatilization of summer maize. *Trans. Chin. Soc. Agric. Eng.* **2009**, *25*, 41–46.
41. Han, K.; Zhang, J.T.; ShangGuan, Y.-x.; Shi, R.P.; Li, Z.J.; Wang, L.Q. Effects of Water and Nitrogen Coupling on Soil Gaseous Nitrogen Emission Under Alternate Irrigation & N Placement. *Chin. J. Environ. Sci.* **2011**, *32*, 1557–1563.
42. Li, H.M.; Guan, C.L.; Zhou, H.P.; Yang, Z.P.; Xie, W.Y. Effect of fertilization on soil ammonia volatilization in spring corn fields. *Chin. J. Eco-Agric.* **2007**, *15*, 76–79.
43. Yan, L.; Wang, Y.; Feng, G.Z.; Du, X.Q.; Liu, S.R.; Cao, M.Y.; Gao, Q. Effect of different fertilization management on nitrogen loss in black soils in Northeast China. *J. Agro-Environ. Sci.* **2016**, *35*, 1816–1823.
44. Han, W.J.; Wang, Y.; H.X., C.; Zou, C.Y.; Gao, Q. Study on the Effect of New-type Fertilizer Application on Spring Maize Production and Its Environmental Impact in Black Soil Area. *J. Soil Water Conserv.* **2016**, *30*, 307–311.
45. Song, Z.X.; Li, H.; Li, J.Z.; Yin, C.X.; Wang, L.G. Effect of controlled-release fertilizer on the yield and soil ammonia volatilization of spring maize in northeast China. *J. Agro-Environ. Sci.* **2018**, *37*, 2342–2349.
46. Li, Y.F.; Jia, K.; Wang, J.Y.; Feng, G.Z.; Yan, L.; Deng, C.; Li, H.; Gao, Q. Ammonia volatilization characteristics of different kinds of high-nitrogen compound fertilizers and their effects on nitrogen balance. *J. Plant Nutr. Fertil. Sci.* **2015**, *21*, 615–623.
47. Wang, L.J.; Liu, Z.J.; Wang, J.H. Ammonia Volatilization of Corn Farmland Ecosystem under Various Proportions of Nitrogen and Phosphorus in Black Soil. *J. Northeast. For. Univ.* **2009**, *37*, 87–90.
48. Chen, A.Q.; Lei, B.K.; Hu, W.L.; Lu, Y.; Mao, Y.T.; Duan, Z.Y.; Shi, Z.S. Characteristics of ammonia volatilization on rice grown under different nitrogen application rates and its quantitative predictions in Erhai Lake Watershed, China. *Nutr. Cycl. Agroecosys.* **2015**, *101*, 139–152, doi:10.1007/s10705-014-9660-7.
49. Ji, Y.G.; Sun, J.W.; Zhou, W.; Liang, G.Q.; He, P.; Ma, X.F.; Wei, D.; Wu, Y. In situ study of ammonia volatilization from black soil with maize monoculture system. *Plant Nutr. Fertil. Sci.* **2009**, *15*, 1044–1050.
50. Zhao, W.; Wang, H.Y.; Yu, J.; Liao, S.; Song, W.J. Effects of Manure and Chemical Fertilizers Application on Nitrogen Cycling and Balance in Agricultural Ecosystem of Black Soil. *J. Soil Water Conserv.* **2010**, *24*, 155–158.

51. Ba, C.; Yang, M.; Zou, H.T.; Jiang, Y.F.; Wang, D.L.; Chen, S.L.; Yu, N.; Zhang, Y.L. Combined effects of coating/inhibitors on N<sub>2</sub>O emission and ammonia volatilization in farmland soil. *J. Agro-Environ. Sci.* **2018**, *37*, 1291–1299.
52. Cheng, X.Y.; Liu, X.L.; Meng, J.; Lan, Y.; Liu, Z.Q.; Yang, X.; Huang, Y.W.; Huang, T.; Chen, W.F. Effects of biochar on NH<sub>3</sub> volatilization, N<sub>2</sub>O emission and nitrogen fertilizer use efficiency in brown soil. *J. Agro-Environ. Sci.* **2016**, *35*, 801–807, doi:10.11654/jaes.2016.04.026.
53. Jiang, Y.F.; Ba, C.; Wang, D.L.; Chen, S.L.; Yang, M.; Zou, H.T.; Zhang, Y.L. Effect of Mixed Polymer-Coated Urea Reduction on Soil NH<sub>3</sub> Volatilization and N<sub>2</sub>O Emission. *Res. Environ. Sci.* **2019**, *32*, 159–165.
54. Yang, X.Y.; Yang, H.D. The ammonia volatilization of anthropogenic-alluvial soil in summer maize farmland under different fertilization methods in Gansu Province. *Agric. Res. Arid. Areas* **2017**, *35*, 79–88.
55. Yang, Y.; Zhou, C.J.; Li, N.; Han, K.; Meng, Y.; Tian, X.X.; Wang, L.Q. Effects of conservation tillage practices on ammonia emissions from Loess Plateau rain-fed winter wheat fields. *Atmos. Environ.* **2015**, *104*, 59–68, doi:10.1016/j.atmosenv.2015.01.007.
56. Lin, L.; Hu, K.L.; Li, G.D.; Wang, H.Y. Evaluation of Nitrogen Loss Way in Summer Maize System Under Different Fertilizer N Managements. *Chin. J. Environ. Sci.* **2011**, *32*, 2617–2624.
57. Yang, Q.L.; Liu, P.; Dong, S.T.; Zhang, J.W.; Zhao, B.; Rongfa, L.I.; Ren, H.; Ren, H.; Han, X.F.J.S.A.S. Effects of Combined Application of Manure and Chemical Fertilizers on Loss of Gaseous Nitrogen and Yield of Summer Maize. *Sci. Agric. Sin.* **2018**, *51*, 2476–2488.
58. Lu, Y.Y.; Song, F.M.; Zhao, J.; Gao, Y. Effects of Controlled-Release Urea on Ammonia Volatilization and Inorganic Nitrogen of Soil and Nitrogen Use Efficiency in Maize. *J. Soil Water Conserv.* **2010**, *24*, 79–82.
59. Liu, M.; Zhang, C.; He, Y.F.; Gao, B.; Su, F.; Jiang, R.F.; Ju, X.T. Impact of fertilization method on soil nitrous oxide emissions and ammonia volatilization during summer maize growth period. *J. Plant Nutr. Fertil.* **2016**, *22*, 19–29.
60. Zhao, B.; Dong, S.T.; Wang, K.J.; Zhang, J.W.; Liu, P. Effects of controlled-release fertilizers on summer maize grain yield, field ammonia volatilization, and fertilizer nitrogen use efficiency. *Chin. J. Appl. Ecol.* **2009**, *20*, 2678–2684.
61. An, B.W.; Sun, Y.X.; Li, Z.T.; Wang, J.Q.; Zou, G.Y.; Yang, J.G. Effects of different slow/controlled release fertilizers on yield, quality of fresh maize and ammonia emissions. *J. Appl. Ecol.* **2020**, *31*, 2422–2430.
62. Shan, N.; Zhao, T.K.; Du, L.F.; An, Z.Z.; He, Y.J.; Hao, Y.C.; Sun, X.J.; Chuan, L.M. Ammonia volatilization from maize cropland under different N applications at a rural area of central Northern China Plain. *Soils Fertil. Sci. China* **2020**, *32–40*, doi:10.11838/sfsc.1673-6257.19311.
63. Liu, W.; Zhou, J.X.; Xie, Y.Y.; Xue, X.X.; Xiong, H.F.; Xu, F.S.; Yuan, J.F.; Xiong, Y.S. Ammonia volatilization and nitrogen use efficiency in the field of fresh edible maize as affected by different band fertilization depths of controlled-release urea. *Chin. J. Appl. Ecol.* **2019**, *30*, 1295–1302.
64. Yan, W.; Liu, Q.; Zhang, Y.P.; Gong, R.; Wang, X.X.; Liu, L.F. Ammonia Volatilization Features of the Soil Applied with Controlled-release Urea in Summer Maize Field. *Guizhou Agric. Sci.* **2014**, *136–140*, doi:10.3969/j.issn.1001-3601.2014.04.035.
65. Xie, Y.; Rong, X.M.; Zhang, Y.P.; Xin, H.E.; Shi, D.J.; Liu, Q. Effects of reduced CRNF applications on N<sub>2</sub>O emissions and ammonia volatilization in spring maize soil. *J. Agro-Environ. Sci.* **2016**, *35*, 596–603.
66. Zhang, X.; Wang, Q.; Xu, J.; Gilliam, F.S.; Tremblay, N.; Li, C. In situ nitrogen mineralization, nitrification, and ammonia volatilization in maize field fertilized with urea in Huanghuaihai region of northern China. *PLoS ONE* **2015**, *10*, e0115649, doi:10.1371/journal.pone.0115649.
67. Li, Y.Y.; Huang, L.H.; Zhang, H.; Wang, M.M.; Liang, Z.W. Assessment of Ammonia Volatilization Losses and Nitrogen Utilization during the Rice Growing Season in Alkaline Salt-Affected Soils. *Sustainability* **2017**, *9*, 132, doi:ARTN 132.10.3390/su9010132.
68. Han, X.Z.; Wang, S.Y.; Song, C.Y.; Qiao, Y.F. Fate of fertilizer nitrogen in paddy field of black soil region. *Chin. J. Appl. Ecol.* **2003**, *14*, 1859–1862.
69. Sun, Y.D.; Xia, G.M.; He, Z.L.; Wu, Q.; Zheng, J.L.; Li, Y.H.; Wang, Y.Z.; Chen, T.T.; Chi, D.C. Zeolite amendment coupled with alternate wetting and drying to reduce nitrogen loss and enhance rice production. *Field Crop Res.* **2019**, *235*, 95–103, doi:10.1016/j.fcr.2019.03.004.
70. Sun, X.X.; Li, D.P.; Wu, Z.J.; Cui, Y.L.; Han, M.; Li, Y.H.; Yang, F.; Cui, Y.K. Characteristics of ammonia volatilization and nitrous oxide emission from a paddy soil under continuous application of different slow/controlled release urea. *Chin. J. Appl. Ecol.* **2016**, *27*, 1901–1909, doi:10.13287/j.1001-9332.201606.039.
71. Wang, A.; Ma, X.Z.; Yu, Y.Q.; Xu, J.; Lu, W.Q. Ammonia volatilization from rice-crab culture systems in northern China. *Acta Agric. Zhejiangensis* **2018**, *30*, 622–631.
72. Wang, A.; Dai, D.C.; Ma, X.Z.; Mou, Q.; Yu, Y.Q.; Lu, W.Q. Effects of rice-crab culture on nitrogen leaching in rice fields in the north of China. *J. Zhejiang Univ.* **2019**, *45*, 332–342.
73. Liang, K.M.; Zhong, X.H.; Huang, N.R.; Lampayan, R.M.; Liu, Y.Z.; Pan, J.F.; Peng, B.L.; Hu, X.Y.; Fu, Y.Q. Nitrogen losses and greenhouse gas emissions under different N and water management in a subtropical double-season rice cropping system. *Sci. Total Environ.* **2017**, *609*, 46–57, doi:10.1016/j.scitotenv.2017.07.118.
74. Shi, Z.S.; Xu, Y.B.; Lei, B.K.; Liu, H.B. Ammonia Volatilization under Different Nitrogen Application Rates in Paddy Soil in the Northern Erhai Lake Area. *Chin. J. Soil Sci.* **2014**, *45*, 672–678.
75. Xue, X.X.; Wu, X.P.; Zhang, Y.F.; Luo, X.H.; Zou, B.X.; Wang, D.P.; Wang, W.B. Effects of loss-controlled urea on ammonia volatilization, N translocation and utilization efficiency in paddy rice. *Chin. J. Appl. Ecol.* **2018**, *29*, 133–140.

76. Ahmed, M.; Yu, W.J.; Lei, M.; Raza, S.; Zhou, J.B. Mitigation of ammonia volatilization with application of urease and nitrification inhibitors from summer maize at the Loess Plateau. *Plant Soil Environ.* **2018**, *64*, 164–172, doi:10.17221/46/2018-Pse.
77. Yang, Y.; Zhang, M.; Li, Y.; Fan, X.; Geng, Y. Controlled-release urea commingled with rice seeds reduced emission of ammonia and nitrous oxide in rice paddy soil. *J. Environ. Qual.* **2013**, *42*, 1661–1673, doi:10.2134/jeq2013.06.0255.
78. Liu, T.Q.; Fan, D.J.; Zhang, X.X.; Chen, J.; Li, C.F.; Cao, C.G. Deep placement of nitrogen fertilizers reduces ammonia volatilization and increases nitrogen utilization efficiency in no-tillage paddy fields in central China. *Field Crops Res.* **2015**, *184*, 80–90, doi:https://doi.org/10.1016/j.fcr.2015.09.011.
79. Li, P.F.; Lu, J.W.; Wang, Y.; Wang, S.; Hussain, S.; Ren, T.; Cong, R.H.; Li, X.K. Nitrogen losses, use efficiency, and productivity of early rice under controlled-release urea. *Agr. Ecosyst. Environ.* **2018**, *251*, 78–87, doi:10.1016/j.agee.2017.09.020.
80. Guo, C.; Ren, T.; Li, P.F.; Wang, B.; Zou, J.L.; Hussain, S.; Cong, R.H.; Wu, L.S.; Lu, J.W.; Li, X.K. Producing more grain yield of rice with less ammonia volatilization and greenhouse gases emission using slow/controlled-release urea. *Environ. Sci. Pollut. Res.* **2019**, *26*, 2569–2579, doi:10.1007/s11356-018-3792-2.
81. Liu, T.; Huang, J.; Chai, K.; Cao, C.; Li, C. Effects of N Fertilizer Sources and Tillage Practices on NH<sub>3</sub> Volatilization, Grain Yield, and N Use Efficiency of Rice Fields in Central China. *Front Plant Sci.* **2018**, *9*, 385, doi:10.3389/fpls.2018.00385.
82. Qi, X.; Wu, W.; Shah, F.; Peng, S.; Huang, J.; Cui, K.; Liu, H.; Nie, L. Ammonia volatilization from urea-application influenced germination and early seedling growth of dry direct-seeded rice. *Sci. World J.* **2012**, *2012*, 1–7, doi:10.1100/2012/857472.
83. Li, S.H.; Liu, T.Q.; Ma, Y.H.; Li, C.F. Effects of tillage practices and nitrogen sources on NH<sub>3</sub> volatilization, nitrogen use efficiency and yield in paddy fields in central China. *J. Agric. Resour. Environ.* **2018**, *35*, 447–454.
84. Zhu, J.; Peng, H.; Li, C.J.; Cai, J.P.; Ji, X.H. Application of Quick Lime to Promoting Ammonia Volatilization Loss in Acidic DoubleCropping Rice Field. *Hunan Agric. Sci.* **2017**, *32–36*, doi:10.16498/j.cnki.hnnykx.2017.007.010.
85. Qiao, Y.; Zhu, J.Q.; Wu, Q.X.; Xie, C.J.; Li, M.H.; Huang, S.Q. Nitrogen Loss from Surface Runoff and Ammonia Volatilization from Paddy Field as Impacted by Different Fertilizers and Planting Methods. *J. Irrig. Drain.* **2021**, *40*, 32–41.
86. Tian, C.; Zhou, X.; Xie, G.X.; Liu, Q.; Rong, X.M.; Zhang, Y.P.; Tan, L.Z.; Peng, J.W. Ammonia Volatilization Loss and Nitrogen Use Efficiency in Double-cropping Rice Field as Affected by Decreasing Controlled-release Urea Application Level. *Chin. J. Rice Sci.* **2018**, *32*, 387–397.
87. Xu, M.G.; Li, D.C.; Li, J.M.; Qin, D.Z.; Hosen, Y.; Shen, H.P.; Cong, R.H.; He, X.H. Polyolefin-Coated Urea Decreases Ammonia Volatilization in a Double Rice System of Southern China. *Agron. J.* **2013**, *105*, 277–284, doi:10.2134/agronj2012.0222.
88. Huang, M.; Zhou, X.F.; Chen, J.N.; Cao, F.B.; Jiang, L.G.; Zou, Y.B. Interaction of Changes in pH and Urease Activity Induced by Biochar Addition Affects Ammonia Volatilization on an Acid Paddy Soil Following Application of Urea. *Commun. Soil Sci. Plant Anal.* **2017**, *48*, 107–112.
89. Lin, C.W.; Luo, F.X.; Zhu, B.; Huang, J.J.; Zhu, Y.Q.; Pang, L.Y.; Zhang, H. Ammonia Volatilization Loss and Its Influencing Factors of Paddy Soil in Sichuan Basin. *Southwest China J. Agric. Sci.* **2015**, *28*, 226–231.
90. Li, R.; Cai, W.W.; Ai, T.C.; Shen, H.P.; Wu, H.L.; Wang, B.; Li, R.N. Responses of ammonia volatilization and grain yield under different water and fertilizer practices in a rice paddy. *Soils Fertil. Sci. China* **2020**, *47–54*.
91. Li, H.; Liang, X.Q.; Chen, Y.X.; Tian, G.M.; Zhang, Z.J. Ammonia volatilization from urea in rice fields with zero-drainage water management. *Agr. Water Manag.* **2008**, *95*, 887–894, doi:10.1016/j.agwat.2007.05.016.
92. Xu, J.Z.; Liao, L.X.; Tan, J.Y.; Shao, X.H. Ammonia volatilization in gemmiparous and early seedling stages from direct seeding rice fields with different nitrogen management strategies: A pots experiment. *Soil Till Res.* **2013**, *126*, 169–176, doi:10.1016/j.still.2012.07.005.
93. Sun, H.J.; Zhang, H.L.; Powlson, D.; Min, J.; Shi, W.M. Rice production, nitrous oxide emission and ammonia volatilization as impacted by the nitrification inhibitor 2-chloro-6-(trichloromethyl)-pyridine. *Field Crop Res.* **2015**, *173*, 1–7, doi:10.1016/j.fcr.2014.12.012.
94. He, T.H.; Liu, D.Y.; Yuan, J.J.; Ni, K.; Zaman, M.; Luo, J.F.; Lindsey, S.; Ding, W.X. A two years study on the combined effects of biochar and inhibitors on ammonia volatilization in an intensively managed rice field. *Agr. Ecosyst. Environ.* **2018**, *264*, 44–53, doi:10.1016/j.agee.2018.05.010.
95. Xu, J.Z.; Peng, S.Z.; Yang, S.H.; Wang, W.G. Ammonia volatilization losses from a rice paddy with different irrigation and nitrogen managements. *Agr. Water Manag.* **2012**, *104*, 184–192, doi:10.1016/j.agwat.2011.12.013.
96. Cao, Y.S.; Tian, Y.H.; Yin, B.; Zhu, Z.L. Assessment of ammonia volatilization from paddy fields under crop management practices aimed to increase grain yield and N efficiency. *Field Crop Res.* **2013**, *147*, 23–31, doi:10.1016/j.fcr.2013.03.015.
97. Lin, D.X.; Fan, X.H.; Hu, F.; Zhao, H.T.; Luo, J.F. Ammonia volatilization and nitrogen utilization efficiency in response to urea application in rice fields of the Taihu Lake region, China. *Pedosphere* **2007**, *17*, 639–645, doi:10.1016/S1002-0160(07)60076-9.
98. Xu, S.S.; Hou, P.F.; Xue, L.H.; Wang, S.H.; Yang, L.Z. Treated domestic sewage irrigation significantly decreased the CH<sub>4</sub>, N<sub>2</sub>O and NH<sub>3</sub> emissions from paddy fields with straw incorporation. *Atmos. Environ.* **2017**, *169*, 1–10, doi:10.1016/j.atmosenv.2017.09.009.
99. Feng, Y.; Sun, H.; Xue, L.; Liu, Y.; Gao, Q.; Lu, K.; Yang, L. Biochar applied at an appropriate rate can avoid increasing NH<sub>3</sub> volatilization dramatically in rice paddy soil. *Chemosphere* **2017**, *168*, 1277–1284, doi:10.1016/j.chemosphere.2016.11.151.
100. Wang, J.; Wang, D.J.; Zhang, G.; Wang, C. Effect of wheat straw application on ammonia volatilization from urea applied to a paddy field. *Nutr. Cycl. Agroecosys.* **2012**, *94*, 73–84, doi:10.1007/s10705-012-9527-8.

101. Sun, H.J.; Zhang, H.L.; Min, J.; Feng, Y.F.; Shi, W.M. Controlled-release fertilizer, floating duckweed, and biochar affect ammonia volatilization and nitrous oxide emission from rice paddy fields irrigated with nitrogen-rich wastewater. *Paddy Water Environ.* **2016**, *14*, 105–111, doi:10.1007/s10333-015-0482-2.
102. Sun, H.; Min, J.; Zhang, H.; Feng, Y.; Lu, K.; Shi, W.; Yu, M.; Li, X. Biochar application mode influences nitrogen leaching and NH<sub>3</sub> volatilization losses in a rice paddy soil irrigated with N-rich wastewater. *Environ. Technol.* **2018**, *39*, 2090–2096, doi:10.1080/09593330.2017.1349839.
103. Lin, Z.C.; Dai, Q.G.; Ye, S.C.; Wu, F.G.; Jia, Y.S.; Chen, J.D.; Xu, L.S.; Zhang, H.C.; Huo, Z.Y.; Xu, K. Effects of Nitrogen Application Levels on Ammonia Volatilization and Nitrogen Utilization during Rice Growing Season. *Rice Sci.* **2012**, *19*, 125–134.
104. Tang, Y.; Li, X.; Shen, W.Z.; Duan, Z.Q. Effect of the Slow-Release Nitrogen Fertilizer Oxamide on Ammonia Volatilization and Nitrogen Use Efficiency in Paddy Soil. *Agronomy* **2018**, *8*, 53, doi:10.3390/agronomy8040053.
105. Sun, X.; Zhong, T.; Zhang, L.; Zhang, K.; Wu, W. Reducing ammonia volatilization from paddy field with rice straw derived biochar. *Sci. Total Environ.* **2019**, *660*, 512–518, doi:10.1016/j.scitotenv.2018.12.450.
106. Li, Y.; Chen, Y.; Wu, C.Y.; Tang, X.; Ji, X.J. Determination of optimum nitrogen application rates in Zhejiang Province, China, based on rice yields and ecological security. *J. Integr. Agr.* **2015**, *14*, 2426–2433, doi:10.1016/S2095-3119(15)61168-6.
107. Zhao, L.M.; Wu, L.H.; Dong, C.J.; Li, Y.S. Rice yield, nitrogen utilization and ammonia volatilization as influenced by modified rice cultivation at varying nitrogen rates. *Agric. Sci.* **2010**, *1*, 10–16.
108. Cai, G.X.; Zhu, Z.L.; Trevitt, A.; Freney, J.R.; Simpson, J.R. Nitrogen loss from ammonium bicarbonate and urea fertilizers applied to flooded rice. *Fertil. Res.* **1986**, *10*, 203–215.
109. Liao, L.X.; Shao, X.H.; Ji, R.J.; Wen, T.; Xu, J.Z. Ammonia Volatilization from Direct Seeded Later-rice Fields as Affected by Irrigation and Nitrogen Managements. *Int. J. Agric. Biol.* **2015**, *17*, 582–588, doi:10.17957/Ijab/17.3.14.636.
110. Li, H.; Chen, Y.; Liang, X.; Lian, Y.; Li, W. Mineral-nitrogen Leaching and Ammonia Volatilization from a Rice–Rapeseed System as Affected by 3,4-Dimethylpyrazole Phosphate. *J. Environ. Qual.* **2009**, *38*, 2131–2137.
111. Yang, G.Y.; Ji, H.T.; Sheng, J.; Zhang, Y.F.; Feng, Y.F.; Guo, Z.; Chen, L.G. Combining Azolla and urease inhibitor to reduce ammonia volatilization and increase nitrogen use efficiency and grain yield of rice. *Sci. Total Environ.* **2020**, *743*, 140799–140808, doi:10.1016/j.scitotenv.2020.140799.
