# Supplementary material
Source: MDPI journal article supplement (https://www.mdpi.com/2073-4395/11/12/2593)
Supplement: s1 [file s1]

Archive with 3 entries (3 files):
- agronomy-1478287 -supplementary/agronomy-1478287 -FigureS1.pdf
- agronomy-1478287 -supplementary/agronomy-1478287-Table S2 .pdf
- agronomy-1478287 -supplementary/Table S1  new.pdf
